# Supplementary material for: The phosphoproteome of rice leaves responds to water and nitrogen supply
Source: Royal Society of Chemistry journal article supplement (doi:10.1039/d1mo00137j), 2021-07-16
Supplement: d1mo00137j1.xlsx [file d1mo00137j1.xlsx]

## Sheet: Legends
Column header	Explanation
Row number
UniProt ID	Single UniProt (http://www.uniprot.org) identifier of the protein to which the peptide maps
Protein Name	Name of protein to which the peptide maps
Phosphorylated amino acid	Phosphorylated amino acid residue (S, T, Y)
Position	The position where amino acid residue is phosphorylated
Sequence window	Sequence window of ±15 amino acids with S,T,Y in the center
Motifs	Binding motifs, where phosphorylation has occurred
Localization probability	Probabilities of site/peptide spectrum match where phosphorylation has been identified
Log2-LFQ intensity	Log-transformed label-free quantification intensity
	Note: NaN indicates Not a Number- no value reported

## Sheet: Phosphopeptides-all
			Phosphopeptides identified in at least two replicates in one or more of the four treatments
Row	UniProt ID	Protein name	Phosphorylated amino acid	Position	Sequence window	Motifs	Localization probability	Log2 LFQ Intensity_WW/N750-1	Log2 LFQ Intensity_WW/N750-2	Log2 LFQ Intensity_WW/N750-3	Log2 LFQ Intensity_WW/N250-1	Log2 LFQ Intensity_WW/N250-2	Log2 LFQ Intensity_WW/N250-3	Log2 LFQ Intensity_WD/N750-1	Log2 LFQ Intensity_WD/N750-2	Log2 LFQ Intensity_WD/N750-3	Log2 LFQ Intensity_WD/N250-1	Log2 LFQ Intensity_WD/N250-2	Log2 LFQ Intensity_WD/N250-3
1	A0A0N7KG25	Os02g0739100 protein	S	201	YRAERRQDAHESSAPSPPRSRKNRIDQEPLI	Cdc2 kinase substrate motif;CDK kinase substrate motif;CDK1,2,4,6 kinase substrate motif;DNA dependent Protein kinase substrate motif;ERK1,2 kinase substrate motif;G protein-coupled receptor kinase 1 substrate motif;GSK3 kinase substrate motif;GSK-3, ERK1, ERK2, CDK5 substrate motif;MAPKAPK2 kinase substrate motif;WW domain binding motif	0.815558	22.521	24.9163	24.9078	NaN	NaN	24.5877	NaN	NaN	22.7895	24.3047	NaN	NaN
2	P48599	Eukaryotic translation initiation factor 4E-1 (eIF-4E-1)	S	17	AEEHETRPPSAGRPPSSGRGRADDADEREEG	14-3-3 domain binding motif;Calmodulin-dependent protein kinase II substrate motif;CLK1 kinase substrate motif;DNA dependent Protein kinase substrate motif;PKA kinase substrate motif;PKC kinase substrate motif	0.854857	NaN	22.339	27.3209	NaN	NaN	22.429	NaN	NaN	NaN	NaN	NaN	NaN
3	A0A0P0VS53	Os03g0114300 protein (Fragment)	S	197	SGPLALPTRASANSLSAPIRSSGGYVGSLGD		0.992449	NaN	NaN	NaN	NaN	NaN	NaN	NaN	24.0096	24.8333	NaN	23.6524	NaN
4	A0A0P0VTB1	Os03g0157600 protein	S	10	______MAAAAAAATSPRNYTDFVPPHQLVE	ERK1,2 kinase substrate motif;Growth associated histone HI kinase substrate motif;GSK-3, ERK1, ERK2, CDK5 substrate motif;PKA kinase substrate motif;PKC kinase substrate motif;WW domain binding motif	0.871847	28.1444	27.7349	27.2594	28.195	27.5881	28.4887	27.4939	26.9505	26.3144	27.5531	27.0509	28.0371
5	A0A0P0VVR4	Os03g0265700 protein (Fragment)	S	510	EEPPSYSTSVLQKRESFENPLAGRGGRSFGS	b-Adrenergic Receptor kinase substrate motif;Calmodulin-dependent protein kinase II substrate motif;Casein kinase II substrate motif;Chk1 kinase substrate motif;G protein-coupled receptor kinase 1 substrate motif;PAK2 kinase substrate motif;PKA kinase substrate motif;PKC kinase substrate motif	1	25.2693	25.4034	NaN	26.395	25.3796	25.5941	25.3271	NaN	NaN	25.6598	25.7074	NaN
6	A0A0P0VVR4	Os03g0265700 protein (Fragment)	S	522	KRESFENPLAGRGGRSFGSHEDEDRSSGNPQ	Casein kinase II substrate motif	0.999795	26.9277	26.5288	25.6995	NaN	26.0028	26.8829	26.3696	27.5615	26.1701	26.2009	26.1724	27.0443
7	A0A0P0VVR4	Os03g0265700 protein (Fragment)	S	525	SFENPLAGRGGRSFGSHEDEDRSSGNPQSGK	Casein kinase II substrate motif;Pyruvate dehydrogenase kinase substrate motif	0.996639	25.4719	NaN	26.5748	27.3461	NaN	26.9966	NaN	NaN	NaN	NaN	24.6758	26.7722
8	A0A0P0W1J8	Os03g0686300 protein (Fragment)	S	1077	MESENKVLRQQAVAISPTAKSLAAYPKSPFQ	Casein kinase II substrate motif;ERK1,2 kinase substrate motif;GSK-3, ERK1, ERK2, CDK5 substrate motif;WW domain binding motif	0.827868	24.7063	24.9242	24.203	NaN	25.5837	24.9073	NaN	NaN	NaN	NaN	NaN	NaN
9	A0A0P0W9D5	Os04g0382300 protein (Fragment)	S	55	SAVGSPVANLVSRLGSFTFRRTSSGRVETTT	14-3-3 domain binding motif;Calmodulin-dependent protein kinase II alpha substrate motif;Calmodulin-dependent protein kinase II substrate motif;Calmodulin-dependent protein kinase IV substrate motif;Casein kinase II substrate motif;Chk1 kinase substrate motif;MAPKAPK2 kinase substrate motif;PKA kinase substrate motif;PKC kinase substrate motif	0.998966	23.9561	23.9098	24.0323	NaN	24.0245	NaN	NaN	NaN	23.2252	22.9082	NaN	23.2509
10	A0A0P0WAD7	Os04g0423600 protein	S	13	___MADEYDRSSYRRSGADDEEGGYNKTNTG	Casein kinase II substrate motif;MAPKAPK2 kinase substrate motif;PKA kinase substrate motif;PKC kinase substrate motif;Pyruvate dehydrogenase kinase substrate motif	0.999999	24.3077	22.6227	23.3855	NaN	21.9367	NaN	NaN	21.4036	NaN	22.9257	22.1794	23.849
11	A0A0P0WAI0	Os04g0440000 protein (Fragment)	S	147	QDAKTSKVGAEVSDRSPKHKRDSGEGAETAN	ERK1,2 kinase substrate motif;Growth associated histone HI kinase substrate motif;GSK-3, ERK1, ERK2, CDK5 substrate motif;PKA kinase substrate motif;PKC kinase substrate motif;WW domain binding motif	0.986881	26.7633	25.3506	24.7323	NaN	NaN	24.7523	NaN	NaN	25.3052	25.4378	25.0292	25.1303
12	Q5NB69	Os01g0231700 protein (cDNA clone:002-128-C07, full insert sequence)	S	109	EAPKAEEKKEEEKEESEDDLGFSLFD_____	b-Adrenergic Receptor kinase substrate motif;Casein kinase II substrate motif;G protein-coupled receptor kinase 1 substrate motif;PKA kinase substrate motif;PKC kinase substrate motif;Pyruvate dehydrogenase kinase substrate motif	0.914864	29.2323	27.8393	26.3909	28.9262	23.0055	NaN	NaN	25.8242	29.3796	22.7469	25.6034	23.8711
13	A0A0P0WC02	Os04g0501600 protein (Fragment)	S	289	GRATRRLAKDDDIKSSFKKTGEGESSKKKQK	G protein-coupled receptor kinase 1 substrate motif;MDC1 BRCT domain binding motif;PKA kinase substrate motif;PKC kinase substrate motif;Plk1 PBD domain binding motif	0.85952	23.8939	NaN	24.4669	25.3589	NaN	NaN	25.9998	25.7974	NaN	NaN	NaN	25.2683
14	A0A0P0WEC1	Glucose-6-phosphate 1-epimerase (EC 5.1.3.15)	S	12	____MATASWPPTPRSPRPQAPSVERAKGPS	ERK1,2 kinase substrate motif;Growth associated histone HI kinase substrate motif;GSK-3, ERK1, ERK2, CDK5 substrate motif;PKA kinase substrate motif;PKC kinase substrate motif;WW domain binding motif	0.999998	25.3604	25.615	25.109	26.4682	25.4032	NaN	25.4173	NaN	NaN	25.4909	24.493	24.9316
15	A0A0P0WJI6	Os05g0232200 protein (Fragment)	S	183	FSAIIVDPQMKDTKESPEQSGSNSAVQKMIS	b-Adrenergic Receptor kinase substrate motif;Casein kinase II substrate motif;ERK1,2 kinase substrate motif;G protein-coupled receptor kinase 1 substrate motif;GSK3 kinase substrate motif;GSK-3, ERK1, ERK2, CDK5 substrate motif;PKA kinase substrate motif;PKC kinase substrate motif;WW domain binding motif	0.909809	26.125	25.1731	25.3642	NaN	NaN	NaN	NaN	25.5018	NaN	25.2351	24.8346	24.9978
16	A0A0P0WMY2	Os05g0445500 protein (Fragment)	S	129	AEEAKKEEKVEEKEESDDDMGFSLFD_____	b-Adrenergic Receptor kinase substrate motif;Casein kinase II substrate motif;PKA kinase substrate motif;PKC kinase substrate motif;Pyruvate dehydrogenase kinase substrate motif	1	29.6853	28.6464	28.4266	27.8747	28.5823	28.8044	29.0189	28.0983	27.8351	29.4608	27.8291	29.3977
17	A0A0P0WQC3	Os05g0542732 protein	S	69	GYRAAGRVQPALDPPSPRVAVCGFCRFFGGS	Casein kinase I substrate motif;DNA dependent Protein kinase substrate motif;ERK1,2 kinase substrate motif;G protein-coupled receptor kinase 1 substrate motif;Growth associated histone HI kinase substrate motif;GSK-3, ERK1, ERK2, CDK5 substrate motif;PKA kinase substrate motif;PKC kinase substrate motif;WW domain binding motif	1	NaN	NaN	NaN	24.9093	NaN	25.1189	NaN	NaN	NaN	NaN	NaN	NaN
18	A0A0P0X2K2	Os07g0137900 protein (Fragment)	S	471	REQERRSAVAQQQPPSPTPAKVSINQRNHAN	Casein kinase II substrate motif;DNA dependent Protein kinase substrate motif;ERK1,2 kinase substrate motif;G protein-coupled receptor kinase 1 substrate motif;GSK-3, ERK1, ERK2, CDK5 substrate motif;WW domain binding motif	0.923746	26.0828	26.0533	25.2415	26.6242	NaN	NaN	25.9049	26.9522	NaN	NaN	25.6313	NaN
19	P93431	Ribulose bisphosphate carboxylase/oxygenase activase, chloroplastic (RA) (RuBisCO activase)	S	163	VPLILGIWGGKGQGKSFQCELVFAKMGINPI		1	23.8849	NaN	NaN	NaN	NaN	24.0256	22.9022	NaN	NaN	21.8211	23.2143	22.809
20	A0A0P0X4N7	Os07g0243150 protein (Fragment)	S	26	PPPPSARVARPSATKSVTAAAATEEKGLFDA	Casein kinase II substrate motif;G protein-coupled receptor kinase 1 substrate motif;MAPKAPK2 kinase substrate motif	0.996484	27.9443	27.7788	26.6482	23.3271	26.3419	26.7733	27.6482	26.8017	24.9127	27.5624	26.4337	28.7068
21	A0A0P0X7D6	Os07g0546100 protein (Fragment)	S	13	___GIERSVAPVRPASHEGRVGEARGLEVQE	14-3-3 domain binding motif;Calmodulin-dependent protein kinase II substrate motif;Casein kinase II substrate motif;PKA kinase substrate motif;PKC kinase substrate motif	0.999954	25.4537	NaN	27.7389	NaN	26.8347	NaN	28.1416	28.1037	22.5422	NaN	26.7196	24.4701
22	A0A0P0XAR8	Os07g0685400 protein (Fragment)	S	148	QGKTVQLGKITETVQSPVKAKPEVAFQPPAF	Cdc2 kinase substrate motif;CDK kinase substrate motif;CDK1,2,4,6 kinase substrate motif;ERK1,2 kinase substrate motif;G protein-coupled receptor kinase 1 substrate motif;GSK-3, ERK1, ERK2, CDK5 substrate motif;WW domain binding motif	0.996454	23.495	23.7057	NaN	25.0518	NaN	NaN	22.3823	NaN	NaN	22.6316	22.2494	21.674
23	A0A0P0XB22	Os08g0110800 protein	S	230	ERLIKNVIAEADAGGSPALIARGFGSGQSGS	ERK1,2 kinase substrate motif;GSK-3, ERK1, ERK2, CDK5 substrate motif;WW domain binding motif	1	NaN	23.835	24.2797	NaN	24.2458	25.1043	NaN	NaN	22.4117	23.6667	23.2255	NaN
24	A0A0P0XJK1	Os08g0549950 protein (Fragment)	S	5	___________LGLPSAADRRRGGVDLGDRA	Casein kinase II substrate motif;DNA dependent Protein kinase substrate motif;Pyruvate dehydrogenase kinase substrate motif	1	24.0682	24.2413	23.7551	NaN	24.2032	NaN	NaN	NaN	25.1165	NaN	24.1964	NaN
25	A0A0P0XKG8	Os09g0345600 protein	S	103	FGEVDDRLHHLTKLGSIMWKGVMPHACFPKV	Calmodulin-dependent protein kinase II substrate motif;Chk1 kinase substrate motif;Phosphorylase kinase substrate motif;PKA kinase substrate motif;PKC kinase substrate motif	1	28.5092	29.1144	30.2571	29.5296	26.7833	NaN	28.0431	NaN	NaN	NaN	30.6775	NaN
26	A0A0P0XLG1	Phosphoenolpyruvate carboxylase (EC 4.1.1.31)	S	21	AAGGGGGVGKVERLSSIDAQLRQLVPAKLSE	14-3-3 domain binding motif;Calmodulin-dependent protein kinase II alpha substrate motif;Calmodulin-dependent protein kinase II substrate motif;Calmodulin-dependent protein kinase IV substrate motif;Chk1 kinase substrate motif;MDC1 BRCT domain binding motif;Phosphorylase kinase substrate motif;PKA kinase substrate motif;PKC kinase substrate motif;Plk1 PBD domain binding motif	0.999773	26.7595	24.0007	25.9918	25.5574	24.5532	NaN	22.3761	25.6414	NaN	NaN	NaN	23.4488
27	A0A0P0XLN5	Os09g0279000 protein (Fragment)	S	473	QEQSLIDAIARLAEASDGESDEHNRVRRNAP	Casein kinase II substrate motif;G protein-coupled receptor kinase 1 substrate motif;GSK3 kinase substrate motif	0.998702	26.2523	24.9556	24.1751	25.4026	NaN	NaN	NaN	25.2661	25.8573	24.6412	25.2832	26.4581
28	A0A0P0XLN5	Os09g0279000 protein (Fragment)	S	477	LIDAIARLAEASDGESDEHNRVRRNAPYAGS	b-Adrenergic Receptor kinase substrate motif;Casein kinase I substrate motif;Casein kinase II substrate motif;MAPKAPK2 kinase substrate motif	0.911699	NaN	NaN	NaN	NaN	NaN	NaN	24.6628	25.3047	NaN	NaN	NaN	NaN
29	A0A0P0XNX3	Os09g0473966 protein (Fragment)	S	106	PVNFFRDKNSHERSDSPSLTADSAAKNNSPR	14-3-3 domain binding motif;b-Adrenergic Receptor kinase substrate motif;Calmodulin-dependent protein kinase II substrate motif;Casein kinase II substrate motif;ERK1,2 kinase substrate motif;G protein-coupled receptor kinase 1 substrate motif;GSK-3, ERK1, ERK2, CDK5 substrate motif;PKA kinase substrate motif;PKC kinase substrate motif;WW domain binding motif	0.96905	24.9403	23.8559	NaN	24.4269	24.3005	24.5198	23.503	NaN	23.8108	23.4291	NaN	24.4078
30	A0A0P0XWP1	Os10g0539900 protein (Fragment)	S	316	YGSDHGGDDIEDSLQSPLISRQATSVEGKEI	ERK1,2 kinase substrate motif;G protein-coupled receptor kinase 1 substrate motif;GSK3 kinase substrate motif;GSK-3, ERK1, ERK2, CDK5 substrate motif;WW domain binding motif	0.99549	26.0259	26.8874	NaN	26.5099	NaN	27.4436	NaN	27.9963	NaN	NaN	26.7369	27.1609
31	A0A0P0XZL7	Os11g0158832 protein	S	218	KSPASVKKKEDSEGVSGGGTEDGGGAKSGGA	Casein kinase I substrate motif;G protein-coupled receptor kinase 1 substrate motif;MAPKAPK2 kinase substrate motif	0.799127	21.4625	20.6189	NaN	NaN	NaN	19.7009	23.9885	NaN	NaN	25.9784	NaN	NaN
32	A0A0P0Y1Y5	Adenosylhomocysteinase (EC 3.3.1.1) (Fragment)	S	50	WRRPRRGGSFKVKDLSQADFGRLEIELAEVE	AMP-activated protein kinase substrate motif;ATM kinase substrate motif;Casein kinase II substrate motif;DNA dependent Protein kinase substrate motif;HMGCoA Reductase kinase substrate motif;PKA kinase substrate motif;PKC kinase substrate motif;Pyruvate dehydrogenase kinase substrate motif	1	NaN	23.7387	23.3373	NaN	23.078	NaN	23.7697	NaN	NaN	NaN	24.3748	NaN
33	A0A0P0Y290	Os11g0481400 protein	S	124	RKGGGCGDGRRDGGGSEGARQRWAVAAAA__	G protein-coupled receptor kinase 1 substrate motif	1	27.9932	27.2404	28.0631	NaN	NaN	NaN	26.1274	NaN	NaN	27.3823	NaN	27.1909
34	A0A0P0Y502	Sodium/hydrogen exchanger (Fragment)	S	452	ARHLNRESSALSDPPSPKSFLDPLILNGSDV	Casein kinase I substrate motif;Casein kinase II substrate motif;DNA dependent Protein kinase substrate motif;ERK1,2 kinase substrate motif;Growth associated histone HI kinase substrate motif;GSK-3, ERK1, ERK2, CDK5 substrate motif;MAPKAPK2 kinase substrate motif;PKA kinase substrate motif;PKC kinase substrate motif;WW domain binding motif	0.999963	24.943	25.3583	24.5073	NaN	22.0853	25.5593	23.5633	NaN	NaN	24.235	24.2169	24.6794
35	A0A0P0Y9G9	Os12g0407500 protein (Fragment)	S	251	VSNKESARNDKDDVFSDSEAEDGSSKGRREK	Casein kinase I substrate motif;Casein kinase II substrate motif;G protein-coupled receptor kinase 1 substrate motif	0.818999	25.0539	25.0985	24.6292	NaN	NaN	NaN	NaN	24.8341	NaN	NaN	NaN	NaN
36	Q2QNN5	Lipoxygenase (EC 1.13.11.-)	S	286	PRRCRTGRRRCRTDPSSESPPAKDGAGIYVP	Casein kinase II substrate motif;DNA dependent Protein kinase substrate motif;G protein-coupled receptor kinase 1 substrate motif	0.83636	21.4862	22.7607	24.7463	NaN	NaN	25.2253	NaN	24.8381	NaN	20.8718	22.4783	NaN
37	Q2QNN5	Lipoxygenase (EC 1.13.11.-)	S	287	RRCRTGRRRCRTDPSSESPPAKDGAGIYVPR	Casein kinase I substrate motif;Casein kinase II substrate motif;G protein-coupled receptor kinase 1 substrate motif;MDC1 BRCT domain binding motif;Plk1 PBD domain binding motif	0.861022	NaN	24.0895	25.211	22.823	NaN	26.2986	25.464	25.669	23.8874	NaN	NaN	21.6921
38	A0A0P0YBW6	Os12g0596800 protein (Fragment)	S	32	DEQLARALQESLNADSPPRQNIPVENVPSEP	b-Adrenergic Receptor kinase substrate motif;Cdc2 kinase substrate motif;CDK kinase substrate motif;CDK1,2,4,6 kinase substrate motif;ERK1,2 kinase substrate motif;GSK-3, ERK1, ERK2, CDK5 substrate motif;WW domain binding motif	0.993044	24.6293	25.2829	25.109	25.8946	NaN	24.6539	NaN	25.8358	23.0537	NaN	NaN	24.882
39	B7E741	Os05g0589000 protein (cDNA clone:001-043-A08, full insert sequence) (cDNA clone:J023099O12, full insert sequence)	S	90	STGSTQPSGPEVRSSSFSSSENVRARSSGSS	14-3-3 domain binding motif;Calmodulin-dependent protein kinase II substrate motif;Casein kinase II substrate motif;G protein-coupled receptor kinase 1 substrate motif;GSK3 kinase substrate motif;MDC1 BRCT domain binding motif;PKA kinase substrate motif;PKC kinase substrate motif;Plk1 PBD domain binding motif	0.998876	26.2785	26.6924	25.9135	27.6702	25.8751	26.4369	26.7851	27.1577	26.5976	25.9724	25.9256	26.8044
40	B7F8F5	Os05g0109600 protein (cDNA, clone: J065036M21, full insert sequence)	S	209	HTYASLLGSSLSRSASPDPELVRRVPSPCLP	14-3-3 domain binding motif;Calmodulin-dependent protein kinase II substrate motif;Calmodulin-dependent protein kinase IV substrate motif;Chk1 kinase substrate motif;ERK1,2 kinase substrate motif;GSK-3, ERK1, ERK2, CDK5 substrate motif;MAPKAPK2 kinase substrate motif;PKA kinase substrate motif;PKC kinase substrate motif;WW domain binding motif	0.987817	24.4663	23.765	24.6437	NaN	NaN	24.2135	23.8569	NaN	NaN	23.4671	NaN	NaN
41	B7FAA5	Os04g0480100 protein (cDNA, clone: J100060F14, full insert sequence)	S	463	TIELDDKVRFGQRPGSGAGRVSAVPPAIAEE	14-3-3 domain binding motif;Calmodulin-dependent protein kinase II substrate motif;PKA kinase substrate motif;PKC kinase substrate motif	1	28.4354	27.4402	28.221	28.4241	NaN	NaN	25.8366	NaN	NaN	27.8008	26.4956	28.2088
42	B7FAK7	Os01g0595100 protein (cDNA, clone: J100082C16, full insert sequence)	S	662	SSSVPSRESIANKGASPPRNDIVNEEVDQRQ	Cdc2 kinase substrate motif;CDK kinase substrate motif;CDK1,2,4,6 kinase substrate motif;ERK1,2 kinase substrate motif;GSK-3, ERK1, ERK2, CDK5 substrate motif;PKA kinase substrate motif;PKC kinase substrate motif;WW domain binding motif	1	25.8597	25.1356	NaN	NaN	24.6229	25.329	NaN	24.5508	NaN	25.3432	23.856	24.9243
43	B9GBE2	Os11g0105750 protein	S	440	DESRLASPTQFFTSDSPKSASQKPKGPLEAL	b-Adrenergic Receptor kinase substrate motif;Casein kinase II substrate motif;ERK1,2 kinase substrate motif;G protein-coupled receptor kinase 1 substrate motif;Growth associated histone HI kinase substrate motif;GSK-3, ERK1, ERK2, CDK5 substrate motif;PKA kinase substrate motif;PKC kinase substrate motif;WW domain binding motif	0.99181	26.0307	25.8632	NaN	NaN	26.2508	NaN	25.1358	NaN	26.37	NaN	24.423	24.4078
44	Q0D4F7	Os07g0628700 protein	S	583	MKTITEMVDPYLRSDSSSLDEILRCIHVGLV	14-3-3 domain binding motif;b-Adrenergic Receptor kinase substrate motif;Calmodulin-dependent protein kinase II substrate motif;Calmodulin-dependent protein kinase IV substrate motif;Casein kinase II substrate motif;PKA kinase substrate motif;PKC kinase substrate motif	0.982301	25.5341	25.1845	25.3642	25.896	25.82	25.3924	NaN	NaN	NaN	NaN	25.2285	25.3241
45	Q0DEU8	Transketolase (EC 2.2.1.1) (Fragment)	S	366	LPAGWADALPKYTPESPADATRNLSQQCLNA	b-Adrenergic Receptor kinase substrate motif;Casein kinase II substrate motif;ERK1,2 kinase substrate motif;G protein-coupled receptor kinase 1 substrate motif;GSK-3, ERK1, ERK2, CDK5 substrate motif;Pyruvate dehydrogenase kinase substrate motif;WW domain binding motif	0.993971	24.7323	24.3655	24.0273	24.2288	NaN	NaN	23.9705	NaN	NaN	23.6751	23.5464	23.0892
46	Q0DG76	Os05g0549100 protein	S	538	SVLRVQRKVVRTINESMDELSSQSKSIWWSR	b-Adrenergic Receptor kinase substrate motif;Casein kinase II substrate motif	0.999976	25.5951	25.9922	26.2987	NaN	23.5548	26.0616	27.0182	26.2433	26.8261	26.5508	26.6601	25.5931
47	Q0DI98	Os05g0406000 protein (Fragment)	S	71	SPPRSFASISPPRRHSISITSRNLFDDRSSA	14-3-3 domain binding motif;Aurora-A kinase substrate motif;Calmodulin-dependent protein kinase II substrate motif;Casein kinase II substrate motif;G protein-coupled receptor kinase 1 substrate motif;PAK2 kinase substrate motif;Phosphorylase kinase substrate motif;PKA kinase substrate motif;PKC epsilon kinase substrate motif;PKC kinase substrate motif	0.895538	NaN	NaN	NaN	24.1728	22.3384	NaN	21.5922	NaN	25.5678	NaN	22.9935	22.9441
48	Q0DI98	Os05g0406000 protein (Fragment)	S	63	TPRVTPPDSPPRSFASISPPRRHSISITSRN	Casein kinase II substrate motif;G protein-coupled receptor kinase 1 substrate motif	0.889835	26.8316	25.8257	NaN	NaN	NaN	26.7748	25.0544	26.7281	28.1314	NaN	NaN	NaN
49	Q0DI98	Os05g0406000 protein (Fragment)	S	65	RVTPPDSPPRSFASISPPRRHSISITSRNLF	Cdc2 kinase substrate motif;CDK kinase substrate motif;CDK1,2,4,6 kinase substrate motif;ERK1,2 kinase substrate motif;GSK-3, ERK1, ERK2, CDK5 substrate motif;WW domain binding motif	0.99715	27.1343	26.723	27.8785	27.3296	25.4244	26.5967	25.741	25.7717	NaN	25.834	25.5833	26.3255
50	Q75IQ9	Os05g0164100 protein	S	284	DHNNCNKDNVALPSDSFKKLQVSGIVESKSV	b-Adrenergic Receptor kinase substrate motif;PKA kinase substrate motif;PKC kinase substrate motif	0.994997	27.4517	26.9749	26.5347	27.4543	25.9209	NaN	27.1639	26.6388	25.8581	26.4729	26.337	26.2811
51	Q0J4P2	Heat shock protein 81-1 (HSP81-1) (Heat shock protein 82)	S	220	YPISLWTEKTTEKEISDDEDEEEKKDAEEGK	BARD1 BRCT domain binding motif;Casein kinase II substrate motif;PKA kinase substrate motif;PKC kinase substrate motif	1	25.7927	25.6268	25.2587	27.8038	25.6315	27.1132	26.1558	26.0654	20.5529	25.5528	24.9829	25.7504
52	Q75IQ9	Os05g0164100 protein	S	330	FVDRGVGSTKFGKSSSACSLASGLNFGTGKA	Calmodulin-dependent protein kinase II substrate motif;Casein kinase II substrate motif;MDC1 BRCT domain binding motif;PKA kinase substrate motif;PKC kinase substrate motif;Plk1 PBD domain binding motif	0.778348	NaN	24.9881	NaN	27.7459	NaN	27.3594	26.5181	NaN	NaN	NaN	NaN	22.3884
53	Q75IQ9	Os05g0164100 protein	S	298	DSFKKLQVSGIVESKSVDTLTTLQKQDGQKG	Casein kinase I substrate motif;Casein kinase II substrate motif	0.99999	27.1189	28.0578	28.0526	NaN	26.4433	28.3325	27.7254	26.8516	NaN	27.6676	27.1466	27.4167
54	Q0DP22	Os03g0721200 protein (Fragment)	S	454	FKVAGTSGKAILEGGSDDEGASTEAHGRAII	BARD1 BRCT domain binding motif;Casein kinase I substrate motif;Casein kinase II substrate motif	0.999961	25.5813	26.8294	26.4337	27.7351	26.9944	27.3767	24.4787	27.5395	27.8988	26.5163	26.8875	26.9202
55	Q0DP22	Os03g0721200 protein (Fragment)	S	1249	MTGLEVRKIAKLPEESDGSESSDDDKRK___	b-Adrenergic Receptor kinase substrate motif;Casein kinase II substrate motif	0.891435	27.4949	25.9294	26.3796	NaN	NaN	26.3823	NaN	27.9647	27.2727	26.3327	23.8704	27.3029
56	Q0DPW6	Os03g0656100 protein (Fragment)	S	29	RRAPAPAPAPLTPALSQRFLAERRPAPVPEP	ATM kinase substrate motif;DNA dependent Protein kinase substrate motif;PKA kinase substrate motif;PKC kinase substrate motif	0.986873	24.6294	23.9887	23.6862	NaN	NaN	24.4681	23.9465	NaN	NaN	NaN	NaN	NaN
57	Q0DRS5	Os03g0359000 protein (Fragment)	S	198	GHWDTEHDIEYRFAQSPTARTATTEDAIAQL	Casein kinase II substrate motif;ERK1,2 kinase substrate motif;GSK-3, ERK1, ERK2, CDK5 substrate motif;WW domain binding motif	0.977174	25.041	24.543	24.3487	NaN	23.7662	24.9974	NaN	NaN	25.5379	23.9425	22.8388	24.3043
58	Q0E0T0	Os02g0525600 protein	S	41	TGAAASSPRTMRRSFSNASSGSHGGGGGAKC	14-3-3 domain binding motif;Calmodulin-dependent protein kinase II substrate motif;Calmodulin-dependent protein kinase IV substrate motif;Casein kinase II substrate motif;Chk1 kinase substrate motif;G protein-coupled receptor kinase 1 substrate motif;GSK3 kinase substrate motif;PKA kinase substrate motif;PKC kinase substrate motif;ZIP kinase substrate motif	0.978069	22.7966	26.5753	NaN	NaN	NaN	NaN	26.1735	NaN	NaN	26.1581	26.5832	26.8787
59	Q0E4T3	Os02g0101700 protein (Fragment)	S	368	SSSPSDTGMQIDRSASPDDDLAAKELSSDLP	14-3-3 domain binding motif;Calmodulin-dependent protein kinase II substrate motif;Calmodulin-dependent protein kinase IV substrate motif;Casein kinase II substrate motif;Chk1 kinase substrate motif;ERK1,2 kinase substrate motif;GSK-3, ERK1, ERK2, CDK5 substrate motif;PKA kinase substrate motif;PKC kinase substrate motif;Pyruvate dehydrogenase kinase substrate motif;WW domain binding motif	0.990419	25.9203	25.9532	25.5865	26.2667	25.2051	26.006	25.1424	25.6328	NaN	25.4761	24.6904	26.0883
60	Q0IRF0	Os11g0641300 protein	S	222	NINEKSSSFIEERKKSFGGGGAGAGGKPEK_	14-3-3 domain binding motif;Calmodulin-dependent protein kinase II substrate motif;PKA kinase substrate motif;PKC epsilon kinase substrate motif;PKC kinase substrate motif	1	NaN	23.0217	23.3224	25.0897	NaN	23.6386	NaN	23.388	25.1399	23.3899	23.062	24.5879
61	Q7FAH2	Glyceraldehyde-3-phosphate dehydrogenase 2, cytosolic (EC 1.2.1.12)	S	205	VDGPSMKDWRGGRAASFNIIPSSTGAAKAVG;VDGPSSKDWRGGRAASFNIIPSSTGAAKAVG	14-3-3 domain binding motif;14-3-3 domain binding motif;Calmodulin-dependent protein kinase II substrate motif;Calmodulin-dependent protein kinase II substrate motif;PKA kinase substrate motif;PKA kinase substrate motif;PKC kinase substrate motif;PKC kinase substrate motif	0.998875	22.3363	NaN	23.9607	24.158	23.9905	NaN	NaN	NaN	25.4124	NaN	NaN	23.0053
62	Q0IZR7	Os09g0553900 protein (cDNA clone:J013042N12, full insert sequence)	S	429	EEAKEEKAAAEEAPTSAAGDEVVKEVVHDSA		0.871878	26.4316	25.9905	25.1839	26.1089	NaN	25.9275	NaN	NaN	26.273	26.078	25.1299	25.663
63	Q0IZR7	Os09g0553900 protein (cDNA clone:J013042N12, full insert sequence)	S	135	GEKKGIWGWKPIRALSHIGMNRLGCLFSVEV	14-3-3 domain binding motif;AMP-activated protein kinase substrate motif;Calmodulin-dependent protein kinase II substrate motif;HMGCoA Reductase kinase substrate motif;PKA kinase substrate motif;PKC kinase substrate motif	1	NaN	NaN	NaN	26.6376	NaN	NaN	NaN	NaN	NaN	23.7819	23.6593	24.4524
64	Q0IZR7	Os09g0553900 protein (cDNA clone:J013042N12, full insert sequence)	S	327	SLFARKQSKLSFSITSPKVSRSEPKLTPTKG	ERK1,2 kinase substrate motif;G protein-coupled receptor kinase 1 substrate motif;Growth associated histone HI kinase substrate motif;GSK3 kinase substrate motif;GSK-3, ERK1, ERK2, CDK5 substrate motif;PKA kinase substrate motif;PKC kinase substrate motif;WW domain binding motif	0.873513	NaN	NaN	27.0185	26.721	NaN	NaN	25.5334	26.3892	NaN	NaN	NaN	NaN
65	Q0IZR7	Os09g0553900 protein (cDNA clone:J013042N12, full insert sequence)	S	104	DDGDKGARRAPSKSQSFAAVTTPGGEAAAVA	MAPKAPK2 kinase substrate motif;PKA kinase substrate motif;PKC kinase substrate motif	0.982869	29.6038	29.0697	29.0562	29.7005	28.9403	29.1761	29.0189	26.1389	28.718	NaN	29.2713	28.8272
66	Q0IZR7	Os09g0553900 protein (cDNA clone:J013042N12, full insert sequence)	S	33	LSHTLYQAHTNRRTASLALPRSASEVNGGGA	14-3-3 domain binding motif;Calmodulin-dependent protein kinase II substrate motif;G protein-coupled receptor kinase 1 substrate motif;MAPKAPK2 kinase substrate motif;Phosphorylase kinase substrate motif;PKA kinase substrate motif;PKC kinase substrate motif;ZIP kinase substrate motif	0.999943	26.1711	25.5051	25.3234	26.5927	25.7559	25.4545	25.5943	NaN	NaN	NaN	NaN	25.4715
67	Q0IZV2	Os09g0547300 protein (cDNA clone:J023110J21, full insert sequence)	S	144	DDDSDSEGGGHIKFHSDDEGDAPAHRRPEIV	BARD1 BRCT domain binding motif;Casein kinase II substrate motif;PKA kinase substrate motif;PKC kinase substrate motif	1	24.9866	23.7734	24.3004	NaN	NaN	24.3324	25.887	NaN	26.7305	21.5392	24.6501	25.3025
68	Q0JCA4	Os04g0482800 protein	S	9	_______MAAEEGARSPTRMLAEGHLRVATG	Casein kinase II substrate motif;Cdc2 kinase substrate motif;CDK kinase substrate motif;CDK1,2,4,6 kinase substrate motif;ERK1,2 kinase substrate motif;Growth associated histone HI kinase substrate motif;GSK-3, ERK1, ERK2, CDK5 substrate motif;WW domain binding motif	0.998227	22.8275	27.3228	27.5622	27.9046	NaN	27.7819	NaN	27.5406	27.9144	NaN	27.0801	27.0746
69	Q0JFH5	Eukaryotic translation initiation factor 3 subunit M (eIF3m)	S	407	SAINTIQANKVTDDGSQGIQGLMIR______	ATM kinase substrate motif;Casein kinase I substrate motif;DNA dependent Protein kinase substrate motif	0.870927	24.6906	23.262	25.3509	25.5556	24.9121	NaN	22.4319	NaN	NaN	NaN	NaN	24.1335
70	Q0JHK4	Os01g0858500 protein	S	300	AANQKNQTPKPPATGSP______________	ERK1,2 kinase substrate motif;GSK-3, ERK1, ERK2, CDK5 substrate motif;WW domain binding motif	0.956135	24.5869	24.1498	23.6963	25.3879	24.4751	NaN	25.2996	24.4963	25.6165	NaN	24.3146	NaN
71	Q108X7	CrcB-like protein, expressed (Os10g0567000 protein) (cDNA clone:J033127B07, full insert sequence)	S	23	SNTSERNRVDYARSVSMDSAGHSLGARSASI	14-3-3 domain binding motif;Calmodulin-dependent protein kinase II alpha substrate motif;Calmodulin-dependent protein kinase II substrate motif;Calmodulin-dependent protein kinase IV substrate motif;Casein kinase II substrate motif;G protein-coupled receptor kinase 1 substrate motif;PKA kinase substrate motif;PKC kinase substrate motif	0.867839	25.2622	23.1898	23.9425	NaN	22.6256	NaN	NaN	23.3065	NaN	NaN	NaN	22.7832
72	Q10DD6	Homeodomain protein JUBEL1, putative, expressed (Os03g0732100 protein)	S	426	PNSSKAAASSSGAAQSPSSASKEPPQLSPAD	Casein kinase II substrate motif;ERK1,2 kinase substrate motif;G protein-coupled receptor kinase 1 substrate motif;GSK-3, ERK1, ERK2, CDK5 substrate motif;WW domain binding motif	0.760642	NaN	NaN	NaN	NaN	NaN	NaN	NaN	NaN	NaN	26.4115	NaN	23.5353
73	Q10DR8	Adenylyl cyclase-associated protein	S	325	TAAPAAAPEKTSRAGSFSFKSGPPKLELQMG	14-3-3 domain binding motif;Calmodulin-dependent protein kinase II substrate motif;Casein kinase II substrate motif;MAPKAPK2 kinase substrate motif;PKA kinase substrate motif;PKC kinase substrate motif	0.991936	NaN	27.2332	26.652	27.6822	25.7203	NaN	NaN	NaN	23.6543	NaN	NaN	25.0774
74	Q10KI0	Os03g0383800 protein (SAP domain containing protein, expressed)	S	380	GSPEKLNLDRSSGDESMEEDVMEIKQVESNI	b-Adrenergic Receptor kinase substrate motif;Casein kinase II substrate motif;MAPKAPK2 kinase substrate motif;Plk1 kinase substrate motif	0.952935	24.6272	24.0423	25.3625	NaN	NaN	24.9982	21.5735	NaN	NaN	NaN	24.5745	25.2481
75	Q10KX6	Peptidylprolyl isomerase (EC 5.2.1.8)	S	598	ADRDTDAKEAIPRADSGLAFEEERPGLLARI	14-3-3 domain binding motif;b-Adrenergic Receptor kinase substrate motif;Calmodulin-dependent protein kinase I substrate motif;Calmodulin-dependent protein kinase II substrate motif;Calmodulin-dependent protein kinase IV substrate motif;Chk1 kinase substrate motif;PKA kinase substrate motif;PKC kinase substrate motif	1	24.3223	24.0488	NaN	NaN	NaN	25.9273	NaN	23.8907	NaN	24.4985	24.4309	24.1204
76	Q0JGK4	Probable sucrose-phosphate synthase 1 (EC 2.4.1.14) (Sucrose phosphate synthase 1F) (OsSPS1F) (UDP-glucose-fructose-phosphate glucosyltransferase)	S	179	AQQDTPMKKKFQRNFSELTVSWSDENKEKKL	14-3-3 domain binding motif;Calmodulin-dependent protein kinase I substrate motif;Calmodulin-dependent protein kinase II substrate motif;Calmodulin-dependent protein kinase IV substrate motif;Casein kinase II substrate motif;G protein-coupled receptor kinase 1 substrate motif;PKA kinase substrate motif;PKC kinase substrate motif	1	25.8337	25.6242	25.7979	26.1345	26.1133	26.03	25.4329	25.4781	24.6713	25.8889	25.9355	25.7314
77	Q10N88	ARF GAP-like zinc finger-containing protein ZIGA2, putative, expressed (Os03g0278400 protein) (cDNA clone:J023040P09, full insert sequence)	S	173	DDWDDDFRPDMRRNQSVGSFGESGAESGRQP	14-3-3 domain binding motif;AMP-activated protein kinase substrate motif;Calmodulin-dependent protein kinase I substrate motif;Calmodulin-dependent protein kinase II alpha substrate motif;Calmodulin-dependent protein kinase II substrate motif;Calmodulin-dependent protein kinase IV substrate motif;Casein kinase II substrate motif;Chk1 kinase substrate motif;Doublecortin kinase-1 kinase substrate m…	0.998104	24.3433	24.8658	NaN	NaN	NaN	NaN	24.4354	NaN	NaN	NaN	NaN	25.4042
78	Q10N88	ARF GAP-like zinc finger-containing protein ZIGA2, putative, expressed (Os03g0278400 protein) (cDNA clone:J023040P09, full insert sequence)	S	193	GESGAESGRQPPRSKSTQDMYTRQQLEASAA	14-3-3 domain binding motif;Calmodulin-dependent protein kinase II substrate motif;Casein kinase II substrate motif;PKA kinase substrate motif;PKC kinase substrate motif;Pyruvate dehydrogenase kinase substrate motif	0.964234	NaN	NaN	24.3715	NaN	NaN	24.6545	NaN	NaN	NaN	24.0898	24.3322	24.3095
79	Q10PQ6	Nup133 nucleoporin family protein, expressed (Os03g0225500 protein)	S	729	ELQNALSHQRSSIHLSPQSKNQTTGALWNLI	Casein kinase II substrate motif;ERK1,2 kinase substrate motif;GSK-3, ERK1, ERK2, CDK5 substrate motif;MAPKAPK2 kinase substrate motif;WW domain binding motif	0.994222	25.0676	25.0695	24.9992	NaN	24.5959	25.4467	NaN	25.2852	25.8459	24.7428	24.9555	24.8847
80	Q10Q61	ADP-glucose pyrophosphorylase (ADP-glucose pyrophosphorylase family protein, putative, expressed) (Os03g0208900 protein) (cDNA clone:J023072C15, full insert sequence)	S	216	DVLKQKKDRANLRRVSSFEALHSATKALPAD	14-3-3 domain binding motif;Calmodulin-dependent protein kinase II substrate motif;Casein kinase II substrate motif;G protein-coupled receptor kinase 1 substrate motif;MAPKAPK2 kinase substrate motif;PAK2 kinase substrate motif;PKA kinase substrate motif;PKC epsilon kinase substrate motif;PKC kinase substrate motif	0.757442	27.6296	NaN	27.7278	27.1661	27.0182	NaN	26.715	27.6733	27.4911	NaN	26.5592	NaN
81	Q10Q61	ADP-glucose pyrophosphorylase (ADP-glucose pyrophosphorylase family protein, putative, expressed) (Os03g0208900 protein) (cDNA clone:J023072C15, full insert sequence)	S	217	VLKQKKDRANLRRVSSFEALHSATKALPADY	14-3-3 domain binding motif;AMP-activated protein kinase substrate motif;Calmodulin-dependent protein kinase I substrate motif;Calmodulin-dependent protein kinase II alpha substrate motif;Calmodulin-dependent protein kinase II substrate motif;Calmodulin-dependent protein kinase IV substrate motif;Casein kinase II substrate motif;Chk1 kinase substrate motif;Doublecortin kinase-1 kinase substrate m…	0.998804	25.0152	26.8818	27.1215	26.8737	25.9662	26.7105	26.6179	26.7029	26.9184	26.4323	26.2391	25.9879
82	Q10QF7	Expressed protein (Os03g0198300 protein) (cDNA clone:J013020D08, full insert sequence) (cDNA clone:J013089P22, full insert sequence)	S	339	TKHNTNNAKNNVLGASPSSKSSRSPSGEKSR	Casein kinase II substrate motif;ERK1,2 kinase substrate motif;GSK-3, ERK1, ERK2, CDK5 substrate motif;WW domain binding motif	0.858299	25.2739	25.1639	24.9194	26.2462	24.9873	25.6639	25.7737	25.8162	25.0593	25.1039	25.0312	NaN
83	Q10QG5	Mannitol transporter, putative, expressed (Os03g0197100 protein) (cDNA clone:J023048F11, full insert sequence)	S	250	RLLDIKKAVGIPEDASDGEDVVAIVRANKAS	Casein kinase I substrate motif;Casein kinase II substrate motif	1	24.0031	24.1424	NaN	26.1144	25.634	25.778	NaN	23.9111	NaN	22.4082	NaN	NaN
84	B9FS74	Kinesin-like protein KIN-14L	S	1081	QMRTDTVLLTKEEGGSPIRNPPTAAEDARLA	Casein kinase I substrate motif;Cdc2 kinase substrate motif;CDK kinase substrate motif;CDK1,2,4,6 kinase substrate motif;ERK1,2 kinase substrate motif;GSK-3, ERK1, ERK2, CDK5 substrate motif;WW domain binding motif	0.999997	29.1465	29.2586	28.7658	29.4658	28.8633	29.5726	25.3334	28.8264	28.3432	22.7052	24.5196	28.4811
85	Q10S67	Os03g0132800 protein (Protein kinase family protein, putative, expressed) (cDNA clone:J033117I10, full insert sequence)	S	523	EKRQERLWSKDASAQSPLRLKGLC_______	Cdc2 kinase substrate motif;CDK kinase substrate motif;CDK1,2,4,6 kinase substrate motif;ERK1,2 kinase substrate motif;GSK-3, ERK1, ERK2, CDK5 substrate motif;WW domain binding motif	0.999963	25.8379	26.0461	24.6736	26.7967	24.9839	26.0848	NaN	25.5426	NaN	26.1607	NaN	25.4662
86	Q10S92	EF hand family protein, expressed (Os03g0130500 protein)	S	1032	DSINNSKGENVTGFDSPKSSTNFGRFDSFDD	b-Adrenergic Receptor kinase substrate motif;Casein kinase II substrate motif;ERK1,2 kinase substrate motif;G protein-coupled receptor kinase 1 substrate motif;Growth associated histone HI kinase substrate motif;GSK3 kinase substrate motif;GSK-3, ERK1, ERK2, CDK5 substrate motif;PKA kinase substrate motif;PKC kinase substrate motif;WW domain binding motif	0.999652	25.6711	25.0578	NaN	25.6724	25.4745	25.7689	23.9741	NaN	19.7317	24.8074	23.3504	24.7474
87	Q10S92	EF hand family protein, expressed (Os03g0130500 protein)	S	948	FFGSDDFGVNPVRVGSPSGASTYGKKKSSFF	14-3-3 domain binding motif;Calmodulin-dependent protein kinase II substrate motif;Casein kinase II substrate motif;ERK1,2 kinase substrate motif;G protein-coupled receptor kinase 1 substrate motif;GSK-3, ERK1, ERK2, CDK5 substrate motif;PKA kinase substrate motif;PKC kinase substrate motif;WW domain binding motif	0.998258	23.7613	25.3807	25.2642	25.9045	25.005	NaN	NaN	26.2233	26.773	NaN	25.0512	NaN
88	Q2QN51	Leo1, expressed (Os12g0579000 protein) (cDNA clone:002-108-C04, full insert sequence)	S	642	ASASQRRKEIDSDDDSPPRKQQAVHRRKAVV	b-Adrenergic Receptor kinase substrate motif;Casein kinase I substrate motif;Cdc2 kinase substrate motif;CDK kinase substrate motif;CDK1,2,4,6 kinase substrate motif;ERK1,2 kinase substrate motif;GSK-3, ERK1, ERK2, CDK5 substrate motif;MAPKAPK2 kinase substrate motif;WW domain binding motif	0.999974	NaN	22.5944	NaN	NaN	22.3897	NaN	23.7375	24.5123	24.7751	NaN	22.126	22.8103
89	Q84ZK1	Eukaryotic translation initiation factor 5A (eIF-5A)	S	2	______________MSDSEEHHFESKADAGA	Casein kinase II substrate motif	1	30.8537	31.0819	30.8381	31.4937	30.4688	NaN	30.6831	31.3976	30.4806	30.3008	29.0495	31.4337
90	Q84ZK1	Eukaryotic translation initiation factor 5A (eIF-5A)	S	4	____________MSDSEEHHFESKADAGASK	b-Adrenergic Receptor kinase substrate motif;Casein kinase II substrate motif;G protein-coupled receptor kinase 1 substrate motif	1	30.8537	31.0819	30.6414	NaN	30.2954	NaN	30.6831	31.3976	28.9144	NaN	31.0003	32.0877
91	Q2QX49	CBS domain-containing protein, putative, expressed (Os12g0169400 protein)	S	46	AAAANGNGKASSKPTSPGQLTGERTVRKLRL	ERK1,2 kinase substrate motif;GSK-3, ERK1, ERK2, CDK5 substrate motif;MAPKAPK2 kinase substrate motif;PKA kinase substrate motif;PKC kinase substrate motif;WW domain binding motif	0.840635	26.4018	26.7696	26.3318	26.6859	NaN	NaN	25.7339	26.7629	27.0384	NaN	NaN	26.0417
92	Q10BX9	FAD synthetase, chloroplastic (EC 2.7.7.2) (FAD pyrophosphorylase) (FMN adenylyltransferase) (Flavin adenine dinucleotide synthase)	S	202	PYCKNVVPIEYQVEFSKVRYLTPRQFVERLS		0.999992	NaN	24.6327	NaN	NaN	NaN	NaN	26.4143	NaN	NaN	19.7091	25.099	NaN
93	Q5JJM4	Os01g0367300 protein	S	307	PVGRSPRTHSPKELDSPRPENEVGKLATSQN	b-Adrenergic Receptor kinase substrate motif;Casein kinase I substrate motif;ERK1,2 kinase substrate motif;Growth associated histone HI kinase substrate motif;GSK-3, ERK1, ERK2, CDK5 substrate motif;PKA kinase substrate motif;PKC kinase substrate motif;WW domain binding motif	1	26.3756	25.6484	25.0128	NaN	NaN	25.56	NaN	25.8474	NaN	NaN	25.2534	25.639
94	Q5JJM4	Os01g0367300 protein	S	323	PRPENEVGKLATSQNSPVRRRSRSPGKHETN	Cdc2 kinase substrate motif;CDK kinase substrate motif;CDK1,2,4,6 kinase substrate motif;ERK1,2 kinase substrate motif;GSK-3, ERK1, ERK2, CDK5 substrate motif;WW domain binding motif	0.996856	26.3605	25.275	26.0823	27.4376	NaN	25.6481	NaN	26.5324	26.5271	25.9304	24.9247	23.1897
95	Q5JJM4	Os01g0367300 protein	S	86	QIPCNTMKSASTSPASPLKQADDHHVHIDSD	Cdc2 kinase substrate motif;CDK kinase substrate motif;CDK1,2,4,6 kinase substrate motif;ERK1,2 kinase substrate motif;GSK-3, ERK1, ERK2, CDK5 substrate motif;WW domain binding motif	0.996183	NaN	NaN	NaN	NaN	NaN	NaN	22.9381	NaN	NaN	23.3491	23.1827	24.8045
96	Q5JKH1	Os01g0924900 protein (cDNA clone:J013128L13, full insert sequence)	S	9	_______MASDAKPDSPPAGVDPPPPKEEAK	b-Adrenergic Receptor kinase substrate motif;ERK1,2 kinase substrate motif;GSK-3, ERK1, ERK2, CDK5 substrate motif;PKA kinase substrate motif;PKC kinase substrate motif;WW domain binding motif	0.994968	28.7685	28.7598	26.548	29.1622	28.3355	29.0691	28.3448	28.3753	27.9998	28.3587	27.8615	28.5804
97	Q5JLH8	Os01g0534900 protein (cDNA clone:J033133I03, full insert sequence)	S	50	DRVYFPKWYLKGARESPSHGGAFVRKFVNLD	b-Adrenergic Receptor kinase substrate motif;Casein kinase II substrate motif;ERK1,2 kinase substrate motif;GSK-3, ERK1, ERK2, CDK5 substrate motif;PKA kinase substrate motif;PKC kinase substrate motif;WW domain binding motif	0.9868	NaN	NaN	NaN	27.4708	NaN	NaN	NaN	26.3868	NaN	25.1052	25.3179	NaN
98	Q5JN45	Os01g0959000 protein (cDNA clone:J023048A15, full insert sequence)	S	101	PSPPPPKKASPPRKASPAPESVVLHIDHLSR	14-3-3 domain binding motif;Calmodulin-dependent protein kinase II substrate motif;ERK1,2 kinase substrate motif;GSK-3, ERK1, ERK2, CDK5 substrate motif;PKA kinase substrate motif;PKC epsilon kinase substrate motif;PKC kinase substrate motif;WW domain binding motif	0.99916	27.5083	NaN	27.0298	26.2639	24.8805	NaN	26.2309	26.6425	27.1452	NaN	NaN	NaN
99	Q5N770	Os01g0813900 protein	S	254	DTGYSSPSIHHSRNVSSENPPSHRHPNATSQ	14-3-3 domain binding motif;Calmodulin-dependent protein kinase II substrate motif;Casein kinase II substrate motif;G protein-coupled receptor kinase 1 substrate motif;MAPKAPK2 kinase substrate motif;PKA kinase substrate motif;PKC kinase substrate motif	0.993973	23.9288	23.9239	24.2159	24.3162	NaN	21.9473	NaN	NaN	21.4556	24.9433	23.625	NaN
100	Q5N8I8	Os01g0700000 protein (cDNA clone:001-206-B10, full insert sequence) (cDNA clone:006-310-F01, full insert sequence) (cDNA clone:J023119M09, full insert sequence)	S	88	SMESSEEMVTPRAAASEADEEERKAATSEVP	Casein kinase II substrate motif;G protein-coupled receptor kinase 1 substrate motif;Pyruvate dehydrogenase kinase substrate motif	1	24.4793	27.8355	27.6058	26.6087	27.8952	27.8159	27.6093	28.5833	28.8062	27.7487	28.0605	28.857
101	Q5N8I8	Os01g0700000 protein (cDNA clone:001-206-B10, full insert sequence) (cDNA clone:006-310-F01, full insert sequence) (cDNA clone:J023119M09, full insert sequence)	S	219	KSGGVLVKDVVEVSRSLGAADTTEVARGPAV	G protein-coupled receptor kinase 1 substrate motif	1	23.8275	23.9741	NaN	24.4661	23.8114	23.9869	23.7067	NaN	NaN	23.5151	NaN	24.7808
102	Q5QMK7	Phosphoglycerate mutase (2,3-diphosphoglycerate-independent) (EC 5.4.2.12)	S	81	HGTAVGLPSEDDMGNSEVGHNALGAGRIFAQ	G protein-coupled receptor kinase 1 substrate motif	0.999958	26.1918	26.6003	27.1416	27.9597	26.3221	27.0545	NaN	28.045	NaN	NaN	27.1213	NaN
103	Q5TKQ1	Os05g0540900 protein (cDNA clone:001-015-C07, full insert sequence)	S	107	LYAPPPAPAPLARTSSVLDRLRSFGLYRFRS	14-3-3 domain binding motif;Calmodulin-dependent protein kinase II alpha substrate motif;Calmodulin-dependent protein kinase II substrate motif;Calmodulin-dependent protein kinase IV substrate motif;Casein kinase II substrate motif;Chk1 kinase substrate motif;MDC1 BRCT domain binding motif;Phosphorylase kinase substrate motif;PKA kinase substrate motif;PKC kinase substrate motif;Plk1 PBD domain b…	0.999318	25.5916	25.315	25.861	27.3667	24.8989	25.6163	25.7793	NaN	23.7154	24.6488	25.0292	NaN
104	A0A0P0YD65	Serine/threonine-protein phosphatase (EC 3.1.3.16) (Fragment)	S	618	AAETGGALGGMVRQLSIDQFENEGRRVIYGT	14-3-3 domain binding motif;AMP-activated protein kinase substrate motif;Calmodulin-dependent protein kinase I substrate motif;Calmodulin-dependent protein kinase II alpha substrate motif;Calmodulin-dependent protein kinase II substrate motif;Calmodulin-dependent protein kinase IV substrate motif;Chk1 kinase substrate motif;HMGCoA Reductase kinase substrate motif;Phosphorylase kinase substrate mo…	1	24.1219	23.913	23.9323	NaN	NaN	24.2823	23.9871	NaN	NaN	NaN	NaN	24.1476
105	Q5W6H1	Os05g0350500 protein (cDNA clone:001-037-G08, full insert sequence) (cDNA clone:J033112P14, full insert sequence)	S	3	_____________MSSDDEVREEKELDLSSS	BARD1 BRCT domain binding motif;Casein kinase II substrate motif;MDC1 BRCT domain binding motif;Plk1 PBD domain binding motif	0.857176	26.7465	28.9554	28.9351	30.3156	28.4924	29.4309	28.7359	29.1879	28.0344	29.4458	28.5083	28.8951
106	Q5Z4U6	Os06g0698859 protein	S	25	TEAPRARRPPPPPPDSPEGRSPPLPPPPPGG	b-Adrenergic Receptor kinase substrate motif;Casein kinase II substrate motif;ERK1,2 kinase substrate motif;GSK-3, ERK1, ERK2, CDK5 substrate motif;WW domain binding motif	1	25.2908	NaN	22.7274	25.638	NaN	23.7844	NaN	NaN	25.5858	NaN	NaN	24.4305
107	Q5Z7N3	HMG protein (High mobility group protein) (Os06g0728000 protein) (cDNA clone:001-047-C12, full insert sequence)	S	133	KKAPAKEEEEDDEEESDKSKSEVNDEDDDEG	b-Adrenergic Receptor kinase substrate motif;Casein kinase I substrate motif;Casein kinase II substrate motif;PKA kinase substrate motif;PKC kinase substrate motif	0.991907	NaN	26.5555	24.5954	27.0331	27.2697	25.9582	27.5508	27.8774	NaN	27.1914	27.2598	28.6438
108	Q5Z7T2	Os06g0714200 protein	S	382	YILLCGSRPFWARTESGIFRSVLRADPNFDD	14-3-3 domain binding motif;b-Adrenergic Receptor kinase substrate motif;Calmodulin-dependent protein kinase II substrate motif;PKA kinase substrate motif;PKC kinase substrate motif	0.999987	NaN	25.8946	24.6272	25.7711	NaN	NaN	25.497	25.3644	NaN	25.8292	25.309	25.3899
109	Q5Z9N4	Os06g0717300 protein	S	86	HNAPADVPDEPIEGLSDDEGDAPAKNPPKKP	BARD1 BRCT domain binding motif;Casein kinase I substrate motif;Casein kinase II substrate motif	1	26.9506	26.3952	25.3056	NaN	25.1269	NaN	26.2669	25.4372	NaN	25.3289	25.4614	26.6364
110	Q5ZA31	Os06g0300800 protein	S	691	SRSADGSVSTLLKHPSGAGDENTVSEAPEKT	Calmodulin-dependent protein kinase II substrate motif;Chk1 kinase substrate motif;DNA dependent Protein kinase substrate motif;PKA kinase substrate motif;PKC kinase substrate motif	0.99749	27.0991	NaN	26.8625	27.0803	NaN	27.6615	NaN	27.4398	NaN	NaN	NaN	27.4036
111	Q5ZA31	Os06g0300800 protein	S	585	DSDGASGQGSFGRKDSFGKEEPRGSQGDGVL	14-3-3 domain binding motif;b-Adrenergic Receptor kinase substrate motif;Calmodulin-dependent protein kinase II alpha substrate motif;Calmodulin-dependent protein kinase II substrate motif;Calmodulin-dependent protein kinase IV substrate motif;PKA kinase substrate motif;PKC epsilon kinase substrate motif;PKC kinase substrate motif	1	NaN	27.8427	23.0107	NaN	NaN	27.9447	26.4728	28.089	NaN	27.8509	27.4938	28.1978
112	Q5ZDX8	Os01g0614500 protein	S	430	YPLPGPGFRGQEGGMSPGPGGRAPMYPNVPP	ERK1,2 kinase substrate motif;GSK-3, ERK1, ERK2, CDK5 substrate motif;WW domain binding motif	1	27.6299	27.275	27.8557	27.3072	26.9138	28.1348	27.1138	27.3828	26.9889	28.5634	27.3493	28.3453
113	Q2QS13	UDP-glucose 6-dehydrogenase 5 (UDP-Glc dehydrogenase 5) (UDP-GlcDH 5) (UDPGDH 5) (EC 1.1.1.22) (Os-UGD5)	S	393	MAKFDWDHPRHLQPTSPTAFKQVSVVWDAYE	Casein kinase II substrate motif;ERK1,2 kinase substrate motif;GSK-3, ERK1, ERK2, CDK5 substrate motif;WW domain binding motif	0.895516	NaN	24.9562	24.0435	26.0703	NaN	25.8524	NaN	26.3342	25.301	NaN	NaN	24.5015
114	Q60EJ0	Os05g0501700 protein (cDNA clone:001-007-C02, full insert sequence)	S	7	_________MATHPASPVAGGEKATPPSTPP	ERK1,2 kinase substrate motif;GSK-3, ERK1, ERK2, CDK5 substrate motif;WW domain binding motif	0.999942	25.3492	26.2522	26.3342	27.2953	26.4229	26.9134	26.0033	27.44	27.283	26.5165	26.3388	25.7243
115	Q60EJ0	Os05g0501700 protein (cDNA clone:001-007-C02, full insert sequence)	S	38	PVRLAGGAAAAIQPNSPRFFFSSLAAASASA	ERK1,2 kinase substrate motif;Growth associated histone HI kinase substrate motif;GSK-3, ERK1, ERK2, CDK5 substrate motif;PKA kinase substrate motif;PKC kinase substrate motif;WW domain binding motif	1	28.1587	27.7935	27.4696	NaN	28.0925	28.5988	27.4895	27.7008	28.5564	28.031	NaN	27.1336
116	Q652G4	Os06g0256300 protein	S	367	KPTTPPAQQKMERLQSFEEEHKNALERAKTL	14-3-3 domain binding motif;Calmodulin-dependent protein kinase II alpha substrate motif;Calmodulin-dependent protein kinase II substrate motif;Calmodulin-dependent protein kinase IV substrate motif;Casein kinase II substrate motif;Chk1 kinase substrate motif;PKA kinase substrate motif;PKC kinase substrate motif	1	24.5386	24.3844	23.4087	25.6512	24.564	NaN	NaN	NaN	26.1217	23.1339	NaN	NaN
117	Q65X46	Os05g0543700 protein (cDNA clone:001-010-C07, full insert sequence) (cDNA clone:J023077E11, full insert sequence)	S	323	GTIFQGAKSLYHRENSLQVETSPRQGAATSN	14-3-3 domain binding motif;Calmodulin-dependent protein kinase II alpha substrate motif;Calmodulin-dependent protein kinase II substrate motif;Calmodulin-dependent protein kinase IV substrate motif;Phosphorylase kinase substrate motif;PKA kinase substrate motif;PKC epsilon kinase substrate motif;PKC kinase substrate motif	1	26.5745	26.2837	25.4013	27.1416	25.7095	26.0494	25.9548	26.2055	24.1324	25.6227	25.5591	26.5397
118	Q69MM2	HMG type nucleosome/chromatin assembly factor (Os09g0551600 protein) (cDNA clone:J013071N11, full insert sequence)	S	115	QAGGPATSGDSDKSKSEVNDEDEGSGDE___	G protein-coupled receptor kinase 1 substrate motif;PKA kinase substrate motif;PKC kinase substrate motif	0.883402	22.4844	24.5009	24.2248	NaN	21.2973	25.7361	26.7408	27.0392	NaN	NaN	NaN	24.6398
119	Q69MX3	Os09g0407900 protein (cDNA clone:J023074K10, full insert sequence)	S	8	________MAADDLSSPARKRGRDEEEEEEE	Casein kinase I substrate motif;Cdc2 kinase substrate motif;CDK kinase substrate motif;CDK1,2,4,6 kinase substrate motif;ERK1,2 kinase substrate motif;Growth associated histone HI kinase substrate motif;GSK-3, ERK1, ERK2, CDK5 substrate motif;MDC1 BRCT domain binding motif;Plk1 PBD domain binding motif;WW domain binding motif	0.96178	26.215	25.6686	26.2074	26.7401	25.869	26.3983	26.3713	NaN	26.9534	NaN	26.1129	25.6496
120	Q69P92	Os09g0439400 protein (cDNA clone:J023132L13, full insert sequence)	S	31	ASSPRAAASSASVASSPRAGGVGGRHHHRRW	ERK1,2 kinase substrate motif;Growth associated histone HI kinase substrate motif;GSK-3, ERK1, ERK2, CDK5 substrate motif;MAPKAPK2 kinase substrate motif;MDC1 BRCT domain binding motif;PKA kinase substrate motif;PKC kinase substrate motif;Plk1 PBD domain binding motif;WW domain binding motif	0.841997	18.7935	24.7853	24.6461	25.9999	NaN	25.867	NaN	23.9704	25.2488	NaN	NaN	24.684
121	Q2QSB9	Putative leucine aminopeptidase 1 (EC 3.4.11.1) (Leucyl aminopeptidase 1) (LAP 1) (Proline aminopeptidase 1) (EC 3.4.11.5) (Prolyl aminopeptidase 1)	S	159	VQGEDLRLNAAAAVASGVVLGLHEDRRYKSD		1	27.469	22.6488	NaN	NaN	NaN	NaN	NaN	NaN	NaN	NaN	NaN	NaN
122	Q69UI8	Os08g0116500 protein (cDNA clone:001-011-G09, full insert sequence)	S	100	AAPAAEEKKEEAKEESDDDMGFSLFD_____	b-Adrenergic Receptor kinase substrate motif;Casein kinase II substrate motif;PKA kinase substrate motif;PKC kinase substrate motif;Pyruvate dehydrogenase kinase substrate motif	1	28.3074	27.1124	28.8001	27.859	28.1917	28.4512	26.6932	28.6948	28.9505	26.2927	28.3028	29.3542
123	Q69V57	Fructose-bisphosphate aldolase (EC 4.1.2.13)	S	42	LAADESTGTIGKRLASINVENVEPNRQALRE	14-3-3 domain binding motif;Calmodulin-dependent protein kinase II substrate motif;Phosphorylase kinase substrate motif;PKA kinase substrate motif;PKC kinase substrate motif	1	23.5958	23.1348	23.902	NaN	NaN	NaN	NaN	NaN	23.0279	22.9681	NaN	23.9132
124	Q69WH7	Os06g0332400 protein	S	288	VRVEKPKSVQARGDKSPSIKPEGAKQPDQRS	Casein kinase II substrate motif;ERK1,2 kinase substrate motif;Growth associated histone HI kinase substrate motif;GSK-3, ERK1, ERK2, CDK5 substrate motif;WW domain binding motif	0.993427	19.5434	NaN	NaN	NaN	24.895	22.0124	NaN	NaN	21.098	25.4914	21.2407	25.4759
125	Q69XK9	Os06g0601100 protein (cDNA clone:006-203-F06, full insert sequence) (cDNA clone:006-304-G09, full insert sequence)	S	118	QVFRTKDIAPDVDPPSPRVSGCILCSIFSGS	Casein kinase I substrate motif;DNA dependent Protein kinase substrate motif;ERK1,2 kinase substrate motif;G protein-coupled receptor kinase 1 substrate motif;Growth associated histone HI kinase substrate motif;GSK3 kinase substrate motif;GSK-3, ERK1, ERK2, CDK5 substrate motif;PKA kinase substrate motif;PKC kinase substrate motif;WW domain binding motif	1	24.8669	NaN	23.8452	NaN	24.1356	24.6107	23.4002	24.9674	NaN	NaN	23.3504	NaN
126	Q6EU15	Os02g0672100 protein	S	85	KKRTLPDPDAEVIALSPKTLLATNRFVCEVC	Casein kinase II substrate motif;ERK1,2 kinase substrate motif;Growth associated histone HI kinase substrate motif;GSK-3, ERK1, ERK2, CDK5 substrate motif;PKA kinase substrate motif;PKC kinase substrate motif;WW domain binding motif	1	25.3913	24.4535	24.7663	25.6332	NaN	NaN	NaN	NaN	23.7275	NaN	NaN	NaN
127	Q6EUD7	Phosphoenolpyruvate carboxylase (EC 4.1.1.31)	S	15	_MAAAAGKAAMERHQSIDAQLRLLAPGKVSE	14-3-3 domain binding motif;Calmodulin-dependent protein kinase II alpha substrate motif;Calmodulin-dependent protein kinase II substrate motif;Calmodulin-dependent protein kinase IV substrate motif;Chk1 kinase substrate motif;Phosphorylase kinase substrate motif;PKA kinase substrate motif;PKC kinase substrate motif	1	29.7079	27.5301	28.7155	27.7555	27.8768	27.6665	26.9352	NaN	29.6313	NaN	27.1371	26.9731
128	Q6H547	Ribonuclease	S	970	AKKERLQIWQYGDVESDEEEQAPAARRTGGR	b-Adrenergic Receptor kinase substrate motif;BARD1 BRCT domain binding motif;Casein kinase I substrate motif;Casein kinase II substrate motif	0.999118	NaN	25.4413	26.1831	27.0437	27.1473	27.169	25.8693	NaN	NaN	26.6641	NaN	26.6577
129	Q6K270	Os09g0123300 protein	S	217	PTPHRIPPSPSRFAQSPQIARVGSVNLTVQQ	ERK1,2 kinase substrate motif;G protein-coupled receptor kinase 1 substrate motif;GSK-3, ERK1, ERK2, CDK5 substrate motif;WW domain binding motif	1	25.3095	25.7424	25.3057	NaN	25.2785	NaN	25.2364	NaN	26.3384	NaN	25.5549	25.734
130	Q2R4J4	Zinc finger CCCH domain-containing protein 63 (OsC3H63)	S	215	TYPGAVTNWPLSRSASFIASPRWPGHSSYAQ;TYPGAVTNWTLSRSASFIASPRWPGHSGYAQ	14-3-3 domain binding motif;14-3-3 domain binding motif;Calmodulin-dependent protein kinase II alpha substrate motif;Calmodulin-dependent protein kinase II alpha substrate motif;Calmodulin-dependent protein kinase II substrate motif;Calmodulin-dependent protein kinase II substrate motif;Calmodulin-dependent protein kinase IV substrate motif;Calmodulin-dependent protein kinase IV substrate motif;C…	0.998536	26.7866	27.1842	26.5722	27.4152	26.0654	26.5613	26.8349	26.0429	26.5968	27.2821	26.6706	26.7726
131	Q6K272	Os09g0123100 protein (cDNA clone:J033135J15, full insert sequence)	S	722	PYSIENCEKALVEKDSDGEDSVAPVVTKLSS	b-Adrenergic Receptor kinase substrate motif;Casein kinase I substrate motif;Casein kinase II substrate motif;PKA kinase substrate motif;PKC kinase substrate motif	0.964437	25.9421	NaN	25.5306	26.5432	26.7266	26.893	25.7551	NaN	NaN	NaN	25.2263	NaN
132	Q6K3F7	eIF-2B GDP-GTP exchange factor subunit epsilon	S	557	KNRPTVLDQDDDSDVSAVEDDDYSKFEKEVE	Casein kinase II substrate motif	0.941836	NaN	NaN	NaN	NaN	NaN	NaN	NaN	25.4851	25.4226	NaN	NaN	NaN
133	Q6K3Y6	Os09g0253000 protein	S	7	_________MAAEKGSPLPKFGEWDVNDPAS	Casein kinase I substrate motif;ERK1,2 kinase substrate motif;GSK-3, ERK1, ERK2, CDK5 substrate motif;PKA kinase substrate motif;PKC kinase substrate motif;WW domain binding motif	1	26.3982	25.079	24.4633	23.6538	NaN	22.9583	23.9033	25.4927	NaN	24.403	23.7917	26.1017
134	Q6K624	Os02g0612800 protein	S	275	DADPSGKDVVDDGKLSERTISDELPQEPAKL	Casein kinase II substrate motif;G protein-coupled receptor kinase 1 substrate motif;PKA kinase substrate motif;PKC kinase substrate motif	1	24.2707	23.9362	23.6991	25.3395	NaN	24.2358	NaN	NaN	24.7406	23.5432	23.8017	24.108
135	Q6K712	Os02g0820600 protein (cDNA clone:J013070F02, full insert sequence)	S	28	PAAAAAPAAGGERAPSPSPPPPPRLPALKSA	14-3-3 domain binding motif;Calmodulin-dependent protein kinase II substrate motif;Casein kinase II substrate motif;DNA dependent Protein kinase substrate motif;ERK1,2 kinase substrate motif;G protein-coupled receptor kinase 1 substrate motif;GSK-3, ERK1, ERK2, CDK5 substrate motif;PKA kinase substrate motif;PKC kinase substrate motif;WW domain binding motif	0.985144	25.3694	23.6197	NaN	NaN	23.5825	24.9831	NaN	NaN	22.9766	23.9671	23.2131	23.9241
136	Q6L4W5	Os05g0509400 protein (cDNA clone:002-137-H05, full insert sequence)	S	247	EDEQDFIVERSPRLQSPISKESSFQQTPPHI	14-3-3 domain binding motif;Calmodulin-dependent protein kinase II substrate motif;Casein kinase II substrate motif;ERK1,2 kinase substrate motif;GSK-3, ERK1, ERK2, CDK5 substrate motif;PKA kinase substrate motif;PKC kinase substrate motif;WW domain binding motif	0.999689	NaN	24.5098	24.5843	NaN	24.8152	25.2563	NaN	25.2467	NaN	24.8617	NaN	NaN
137	Q6YST9	Os07g0298600 protein	S	143	REDQHWHLQKRPRRVSAVARLLTMQRRHSV_	14-3-3 domain binding motif;Akt kinase substrate motif;AMP-activated protein kinase 2 substrate motif;Calmodulin-dependent protein kinase II substrate motif;MAPKAPK1 kinase substrate motif;PAK2 kinase substrate motif;PKA kinase substrate motif;PKC epsilon kinase substrate motif;PKC kinase substrate motif	0.999888	NaN	24.5325	25.5058	NaN	NaN	NaN	NaN	NaN	25.7406	NaN	NaN	25.6318
138	Q2QW44	Zinc-finger homeodomain protein 3 (OsZHD3)	S	47	HGGGGGGGGMNGRHMSPPTPPAAAEESKAVV	14-3-3 domain binding motif;Calmodulin-dependent protein kinase II substrate motif;Casein kinase II substrate motif;ERK1,2 kinase substrate motif;G protein-coupled receptor kinase 1 substrate motif;GSK-3, ERK1, ERK2, CDK5 substrate motif;MAPKAPK2 kinase substrate motif;PKA kinase substrate motif;PKC kinase substrate motif;WW domain binding motif	0.999718	26.2841	26.0215	23.9368	NaN	NaN	NaN	NaN	25.0383	NaN	23.576	24.696	25.1945
139	Q6YUH7	Os02g0697300 protein (TOM1 protein) (cDNA clone:J013047D24, full insert sequence)	S	35	GSEVSKKMTAGMSSMSFKMKEIFQGQTPADK	PKA kinase substrate motif;PKC kinase substrate motif	0.98983	NaN	24.3428	24.6264	NaN	24.7195	NaN	NaN	NaN	25.2551	25.5381	24.8667	NaN
140	Q6YVF0	Os02g0223700 protein (cDNA, clone: J100061D19, full insert sequence)	S	64	GAGTNTTTKVMKRATSANAWSRPGGGGGVQR	14-3-3 domain binding motif;Calmodulin-dependent protein kinase II substrate motif;Calmodulin-dependent protein kinase IV substrate motif;Chk1 kinase substrate motif;PKA kinase substrate motif;PKC kinase substrate motif	0.979738	25.0203	25.7845	24.9681	26.6702	24.2883	25.9791	23.8167	NaN	26.2168	NaN	NaN	25.6871
141	Q6YVF0	Os02g0223700 protein (cDNA, clone: J100061D19, full insert sequence)	S	8	________MPMERSVSCAERPPAAFGGGAAA	14-3-3 domain binding motif;Calmodulin-dependent protein kinase II substrate motif;Calmodulin-dependent protein kinase IV substrate motif;Casein kinase II substrate motif;Chk1 kinase substrate motif;PKA kinase substrate motif;PKC kinase substrate motif	0.967889	26.172	25.8238	NaN	NaN	25.3604	26.6613	NaN	NaN	26.3777	NaN	NaN	25.5782
142	Q6YXI1	Glucose-6-phosphate isomerase (EC 5.3.1.9)	S	605	MAANDRALIAEGSCGSPRSIKVYLGECNVDE	Casein kinase II substrate motif;ERK1,2 kinase substrate motif;Growth associated histone HI kinase substrate motif;GSK-3, ERK1, ERK2, CDK5 substrate motif;PKA kinase substrate motif;PKC kinase substrate motif;WW domain binding motif	0.791614	24.1896	23.6233	23.4745	NaN	NaN	25.1774	NaN	24.5051	NaN	23.5706	NaN	23.7442
143	Q6Z0H6	Os08g0328300 protein (cDNA clone:001-123-A04, full insert sequence)	S	143	ADMVNNAQRSHDRVPSPTTSARKRQKTSQSI	14-3-3 domain binding motif;Calmodulin-dependent protein kinase II substrate motif;Casein kinase II substrate motif;DNA dependent Protein kinase substrate motif;ERK1,2 kinase substrate motif;G protein-coupled receptor kinase 1 substrate motif;GSK3 kinase substrate motif;GSK-3, ERK1, ERK2, CDK5 substrate motif;PKA kinase substrate motif;PKC kinase substrate motif;WW domain binding motif	0.997243	24.7366	26.079	26.6424	28.0697	26.4388	26.3319	NaN	NaN	26.6113	25.3023	25.6873	27.0101
144	Q6Z3R6	Os08g0506700 protein (cDNA clone:J023004M08, full insert sequence)	S	53	FCDDFLPPAAAPRAASPDADNVFSRFLADHQ	14-3-3 domain binding motif;Calmodulin-dependent protein kinase II substrate motif;ERK1,2 kinase substrate motif;GSK-3, ERK1, ERK2, CDK5 substrate motif;PKA kinase substrate motif;PKC kinase substrate motif;WW domain binding motif	1	27.2011	26.7255	26.0632	27.0631	25.9953	27.1312	26.2503	25.6719	26.9474	27.0124	25.8578	26.5846
145	A0A0P0Y5T3	Os12g0101800 protein	S	289	SVSELLLALKNPRSLSESSNNTLKRKSQESL	14-3-3 domain binding motif;Calmodulin-dependent protein kinase II substrate motif;Casein kinase II substrate motif;G protein-coupled receptor kinase 1 substrate motif;MAPKAPK2 kinase substrate motif;PKA kinase substrate motif;PKC kinase substrate motif	0.986247	NaN	23.631	NaN	NaN	NaN	NaN	24.3538	NaN	NaN	22.4964	22.3923	22.5258
146	Q6Z8N9	AT-hook motif nuclear-localized protein	S	21	EQGLMAGRDLFGMPKSPPAAAAAPPQSVRMA	ERK1, ERK2, SAPK, CDK5 and GSK3 kinase substrate motif;ERK1,2 kinase substrate motif;G protein-coupled receptor kinase 1 substrate motif;Growth associated histone HI kinase substrate motif;GSK-3, ERK1, ERK2, CDK5 substrate motif;WW domain binding motif	1	25.294	24.6359	24.6581	26.0565	24.7582	NaN	24.9594	24.8019	26.207	NaN	25.014	23.8912
147	Q6ZD98	Os08g0156700 protein (cDNA clone:J023062F08, full insert sequence)	S	3	_____________MASPGPATAGELLRIDPV	ERK1,2 kinase substrate motif;G protein-coupled receptor kinase 1 substrate motif;GSK-3, ERK1, ERK2, CDK5 substrate motif;WW domain binding motif	0.999988	24.7525	23.625	24.8552	24.4571	24.1415	24.2023	23.4884	23.1395	23.0025	24.0115	20.1387	NaN
148	Q6ZFM7	Os07g0582400 protein	S	492	TLEEMSKLFGDTAAASESDEPAKEKKKVEMA	Casein kinase II substrate motif;G protein-coupled receptor kinase 1 substrate motif;Pyruvate dehydrogenase kinase substrate motif	0.97318	NaN	NaN	NaN	25.5198	NaN	26.0742	NaN	NaN	NaN	NaN	25.9937	NaN
149	Q6ZHP6	Os02g0715400 protein	S	62	LTRNTDPARDPDEENSAAPADRAVEEPAAAA	Casein kinase I substrate motif;G protein-coupled receptor kinase 1 substrate motif	0.999688	NaN	NaN	NaN	26.9317	NaN	25.9164	NaN	NaN	NaN	NaN	NaN	NaN
150	Q6ZLP6	Os07g0150500 protein	S	302	QDWEENSTRSAKHTASADPDQIHSRLPEHKQ	PKA kinase substrate motif	0.879973	20.4173	25.2702	25.7352	NaN	24.6694	25.8421	NaN	24.9991	26.9504	24.5285	25.9892	26.3895
151	Q75H96	Os03g0666200 protein (Pleckstriny domain-containing protein, putative, expressed)	S	413	SGTDNSPPLTKHVDASDDDVDKACVSDSRSV	Casein kinase II substrate motif;Pyruvate dehydrogenase kinase substrate motif	1	25.5225	25.2063	24.4005	25.7034	24.517	26.2357	25.6719	26.6854	26.892	NaN	NaN	25.7473
152	Q75LI9	AIG1 family protein, expressed (Os03g0835100 protein)	S	811	TNSLSARVASPANLFSLRFRMPPLPHFLSSL	PKA kinase substrate motif;PKC kinase substrate motif	0.999997	23.6905	24.3892	23.4353	24.8073	NaN	NaN	NaN	21.9008	NaN	23.4149	23.6387	NaN
153	Q7G649	Expressed protein (Os10g0330000 protein) (cDNA clone:001-020-G07, full insert sequence) (cDNA clone:J023043A18, full insert sequence) (cDNA clone:J023092O07, full insert sequence)	S	9	_______MAEENKSGSGDLMASGKVVAEATM	PKA kinase substrate motif;PKC kinase substrate motif	0.972821	25.7278	25.1053	25.8307	NaN	24.2899	25.848	23.6472	NaN	NaN	23.8085	25.2461	26.6717
154	Q7X6J4	Os04g0543200 protein (cDNA clone:J033076A11, full insert sequence) (cDNA clone:J033085H02, full insert sequence)	S	55	AAEEAPKVEEQKRQPSPPLQQPAAEEKASSD	14-3-3 domain binding motif;Calmodulin-dependent protein kinase II substrate motif;DNA dependent Protein kinase substrate motif;ERK1,2 kinase substrate motif;GSK-3, ERK1, ERK2, CDK5 substrate motif;PKA kinase substrate motif;PKC kinase substrate motif;WW domain binding motif	1	26.1645	25.6056	25.3968	26.1513	NaN	26.0272	25.7541	26.1315	26.5264	25.0734	24.4263	25.9197
155	Q7X776	Os04g0655600 protein	S	12	____MASLFRARRRRSPEDDGEGEDGSASGR	14-3-3 domain binding motif;Calmodulin-dependent protein kinase II substrate motif;Casein kinase II substrate motif;ERK1,2 kinase substrate motif;Growth associated histone HI kinase substrate motif;GSK-3, ERK1, ERK2, CDK5 substrate motif;MAPKAPK1 kinase substrate motif;PAK2 kinase substrate motif;Pim1 kinase substrate sequence;PKA kinase substrate motif;PKC epsilon kinase substrate motif;PKC kina…	1	25.4726	24.2417	23.8024	NaN	NaN	24.5445	NaN	25.1754	24.9318	24.0565	24.6773	25.0861
156	Q7X8Y1	Os04g0530300 protein	S	27	EGEAAAAVAARSRSKSIEADEEERSKGRRDR	14-3-3 domain binding motif;Akt kinase substrate motif;Calmodulin-dependent protein kinase II substrate motif;Casein kinase II substrate motif;MAPKAPK1 kinase substrate motif;MAPKAPK2 kinase substrate motif;p70 Ribosomal S6 kinase substrate motif;Phosphorylase kinase substrate motif;PKA kinase substrate motif;PKC kinase substrate motif	0.9864	25.7478	24.72	24.5127	24.9906	21.6455	NaN	23.0658	NaN	25.8356	24.3468	25.5932	NaN
157	Q7XDE0	EF hand family protein, expressed (Os10g0476600 protein) (cDNA clone:J013116N14, full insert sequence) (cDNA clone:J033037A09, full insert sequence)	S	119	RVMRRGSGAGPSSLGSPLKVVSEPVREVIPQ	Cdc2 kinase substrate motif;CDK kinase substrate motif;CDK1,2,4,6 kinase substrate motif;ERK1,2 kinase substrate motif;GSK-3, ERK1, ERK2, CDK5 substrate motif;MAPKAPK2 kinase substrate motif;WW domain binding motif	0.999198	NaN	24.2516	NaN	24.9624	24.4737	NaN	NaN	24.8623	25.3847	23.8081	NaN	NaN
158	Q7XIE2	Os07g0164300 protein (cDNA clone:J033030B17, full insert sequence) (cDNA clone:J033030B18, full insert sequence)	S	8	________MNNLLTDSFELPRGGSSRDGDIE	b-Adrenergic Receptor kinase substrate motif;Casein kinase II substrate motif;G protein-coupled receptor kinase 1 substrate motif	0.955551	NaN	NaN	NaN	23.4129	NaN	23.541	NaN	21.5055	NaN	NaN	NaN	NaN
159	B9FXV5	Eukaryotic translation initiation factor 4G (eIF-4G) (eIF4G) (Eukaryotic initiation factor 4F subunit p220) (eIF-4F p220 subunit)	S	902	KDQSSSAPAASARPVSREKPSVEITRTKFTA	14-3-3 domain binding motif;Calmodulin-dependent protein kinase II substrate motif;Casein kinase II substrate motif;G protein-coupled receptor kinase 1 substrate motif;PKA kinase substrate motif;PKC kinase substrate motif	0.995171	26.6735	26.5881	26.7956	NaN	26.1923	27.0649	26.3668	NaN	26.3219	26.8364	26.4188	26.7247
160	Q336R9	Peptide methionine sulfoxide reductase A4, chloroplastic (OsMSRA4) (EC 1.8.4.11) (Peptide-methionine (S)-S-oxide reductase) (Peptide Met(O) reductase) (Protein-methionine-S-oxide reductase)	S	73	AMSWLGKLGLGGLGGSPRASAASAALAQGPD	ERK1,2 kinase substrate motif;G protein-coupled receptor kinase 1 substrate motif;Growth associated histone HI kinase substrate motif;GSK3 kinase substrate motif;GSK-3, ERK1, ERK2, CDK5 substrate motif;PKA kinase substrate motif;PKC kinase substrate motif;WW domain binding motif	1	25.5567	24.5698	25.4035	25.9615	24.4456	24.6712	NaN	NaN	21.6742	NaN	24.7264	NaN
161	Q7XJY1	Os04g0423400 protein	S	214	QAAKDAEEEAEEESGSGARGGEGKKKHHLFG	Casein kinase I substrate motif	0.860114	24.723	23.2303	NaN	23.4241	NaN	NaN	NaN	25.414	24.4748	23.0162	NaN	24.1774
162	Q7XQH8	Os04g0497600 protein (cDNA clone:001-027-D05, full insert sequence) (cDNA clone:J013149O10, full insert sequence)	S	299	EKSKEAAAQSVKKGESPSENADDPISREDFK	b-Adrenergic Receptor kinase substrate motif;Calmodulin-dependent protein kinase II substrate motif;Casein kinase II substrate motif;Chk1 kinase substrate motif;ERK1,2 kinase substrate motif;GSK-3, ERK1, ERK2, CDK5 substrate motif;PKA kinase substrate motif;PKC kinase substrate motif;WW domain binding motif	0.990369	NaN	NaN	NaN	25.3248	24.3901	NaN	NaN	NaN	25.5394	NaN	NaN	25.7515
163	Q7XTJ6	Os04g0118900 protein	S	202	SPYRRSVSPVYRSRPSPDYGRQRSPVYGSYD	Casein kinase II substrate motif;DNA dependent Protein kinase substrate motif;ERK1,2 kinase substrate motif;GSK-3, ERK1, ERK2, CDK5 substrate motif;PKA kinase substrate motif;PKC kinase substrate motif;WW domain binding motif	0.985667	24.1215	23.0835	23.2987	25.0482	NaN	NaN	NaN	26.3548	25.8527	NaN	NaN	24.6859
164	Q7XXR0	Os03g0744600 protein (Stem-specific protein TSJT1, putative, expressed) (cDNA clone:J013037C05, full insert sequence)	S	217	FEHPLNELKPVPRVDSQGQMCGSNYKVDSEA	14-3-3 domain binding motif;ATM kinase substrate motif;b-Adrenergic Receptor kinase substrate motif;Calmodulin-dependent protein kinase I substrate motif;Calmodulin-dependent protein kinase II substrate motif;Calmodulin-dependent protein kinase IV substrate motif;Chk1 kinase substrate motif;DNA dependent Protein kinase substrate motif;PKA kinase substrate motif;PKC kinase substrate motif	0.999986	21.9639	25.0702	28.4547	NaN	26.4212	28.4213	27.6188	NaN	27.5942	28.3859	27.3924	28.5881
165	Q7XXR0	Os03g0744600 protein (Stem-specific protein TSJT1, putative, expressed) (cDNA clone:J013037C05, full insert sequence)	S	243	VDSEAKKDSGIPRVGSAADWSNHF_______	14-3-3 domain binding motif;Calmodulin-dependent protein kinase II substrate motif;Calmodulin-dependent protein kinase IV substrate motif;Casein kinase II substrate motif;Chk1 kinase substrate motif;PKA kinase substrate motif;PKC kinase substrate motif;Pyruvate dehydrogenase kinase substrate motif	1	27.3929	27.089	27.976	25.9566	25.8984	27.0563	26.1809	25.2378	26.0564	27.0251	26.7765	26.9902
166	Q7Y163	Hepatocellular carcinoma-associated antigen 59 family protein, expressed (Os03g0374100 protein) (cDNA clone:001-042-H03, full insert sequence) (cDNA clone:J033011M11, full insert sequence)	S	19	NFRKRNLEADAAADHSDDDDARRVALEEIKY	Casein kinase II substrate motif;Pyruvate dehydrogenase kinase substrate motif	1	NaN	NaN	NaN	26.5983	NaN	NaN	NaN	26.2975	26.3061	NaN	NaN	26.5881
167	Q7Y1E3	Os03g0860600 protein	S	358	DGRSALHHFRIPPPSSPPH____________	ERK1,2 kinase substrate motif;GSK-3, ERK1, ERK2, CDK5 substrate motif;MDC1 BRCT domain binding motif;Plk1 PBD domain binding motif;WW domain binding motif	0.922883	26.2645	25.8005	24.8672	25.8491	25.2622	NaN	25.4446	NaN	21.89	25.8849	25.4752	26.0552
168	Q84M73	Expressed protein (Os03g0857400 protein) (cDNA clone:J013052N16, full insert sequence)	S	81	QDGDEVVDSNVLQYCSIDGKGKKAEKRSLGE		0.985554	NaN	NaN	NaN	NaN	25.3534	25.9677	27.3154	NaN	NaN	26.8644	25.7617	27.0187
169	Q84QV5	Os08g0525700 protein	S	1040	GSPKAAVSGQQQDWNSPARLPVEKKPKGKKQ	Casein kinase I substrate motif;Cdc2 kinase substrate motif;CDK kinase substrate motif;CDK1,2,4,6 kinase substrate motif;ERK1,2 kinase substrate motif;GSK-3, ERK1, ERK2, CDK5 substrate motif;WW domain binding motif	0.995965	24.8757	25.0236	NaN	NaN	23.784	NaN	NaN	NaN	24.7345	NaN	22.4831	NaN
170	Q40677	Fructose-bisphosphate aldolase, chloroplastic (EC 4.1.2.13) (Chloroplastic aldolase) (AldP)	S	370	LRAKANSLAQLGKYTSDGEAAEAKEGMFVKN	Calmodulin-dependent protein kinase II substrate motif;Casein kinase II substrate motif;Chk1 kinase substrate motif;G protein-coupled receptor kinase 1 substrate motif;PKA kinase substrate motif;PKC kinase substrate motif	0.999643	25.8564	26.0423	26.3237	26.2146	24.8505	24.7913	25.5539	26.9396	NaN	25.6534	25.4272	25.8847
171	Q84T85	Expressed protein (Os03g0853700 protein)	S	272	LDGGGVLSSREAAGGSSDEDDDETRGRIAMY	Casein kinase II substrate motif	0.89981	21.5158	23.8604	NaN	24.2243	NaN	NaN	25.1946	NaN	NaN	25.1584	NaN	24.9677
172	Q8GSE8	Os07g0162500 protein (cDNA clone:001-206-A09, full insert sequence) (cDNA clone:001-207-G10, full insert sequence) (cDNA clone:006-310-E02, full insert sequence)	S	9	_______MASLSDPNSPPPHVVEDCRGALQL	Casein kinase I substrate motif;ERK1,2 kinase substrate motif;GSK-3, ERK1, ERK2, CDK5 substrate motif;MAPKAPK2 kinase substrate motif;WW domain binding motif	0.976819	25.5556	24.6944	26.0069	26.3509	25.4375	26.6157	25.5963	NaN	26.748	NaN	NaN	25.6262
173	Q8H4V1	Phosphoenolpyruvate carboxylase (EC 4.1.1.31)	S	10	______MAGKVEKMASIDAQLRMLAPAKLSE	Calmodulin-dependent protein kinase II substrate motif;Chk1 kinase substrate motif;Phosphorylase kinase substrate motif;PKA kinase substrate motif;PKC kinase substrate motif	1	28.9228	24.6959	28.061	26.7058	NaN	27.6648	25.1361	27.74	28.5178	29.5198	28.3406	27.7505
174	Q8LIB1	Os07g0644300 protein (cDNA clone:J013074K22, full insert sequence) (cDNA clone:J033041F21, full insert sequence)	S	335	MLAAKLEAAEEEGAGSEGEEEAGRKNGMDKL	Casein kinase II substrate motif;G protein-coupled receptor kinase 1 substrate motif	1	24.598	25.0565	24.8096	NaN	24.3424	NaN	NaN	25.6587	24.0916	24.4191	24.513	NaN
175	Q8S1T0	Os01g0835500 protein	S	78	VGGMRPGGGRMTRMQSSAQVGLRGLRFLDKT	14-3-3 domain binding motif;Calmodulin-dependent protein kinase I substrate motif;Calmodulin-dependent protein kinase II substrate motif;Calmodulin-dependent protein kinase IV substrate motif;Chk1 kinase substrate motif;PKA kinase substrate motif;PKC kinase substrate motif	0.970943	26.9453	26.1574	26	27.8374	26.5326	28.0176	26.4539	25.3777	27.1088	26.3931	25.8764	25.6761
176	Q8W0E6	Chlorophyll a-b binding protein, chloroplastic	S	35	ANAKVFGEGRVTMRKSAAKPKPAAASGSPWY	G protein-coupled receptor kinase 1 substrate motif;PKA kinase substrate motif;PKC kinase substrate motif	0.999793	24.8151	28.0885	29.0025	29.3449	NaN	26.734	27.3393	NaN	26.3636	28.2884	26.2031	26.8704
177	Q53JI9	Probable sucrose-phosphate synthase 5 (EC 2.4.1.14) (Sucrose phosphate synthase 5F) (OsSPS5F) (UDP-glucose-fructose-phosphate glucosyltransferase)	S	105	QLSRFARINSDPRIVSDEEEEVTTDRNLYIV	14-3-3 domain binding motif;BARD1 BRCT domain binding motif;Calmodulin-dependent protein kinase II substrate motif;Casein kinase II substrate motif;MAPKAPK2 kinase substrate motif;PKA kinase substrate motif;PKC kinase substrate motif	1	25.8835	26.6834	26.8409	27.5561	26.5549	26.6888	26.3095	26.742	25.6597	27.241	26.1671	26.6103
178	Q94E74	Os01g0511100 protein (cDNA clone:J023069J05, full insert sequence)	S	3	_____________MASPSAPGPKLQKAMVAV	Casein kinase II substrate motif;ERK1,2 kinase substrate motif;G protein-coupled receptor kinase 1 substrate motif;GSK-3, ERK1, ERK2, CDK5 substrate motif;WW domain binding motif	0.99539	NaN	23.8852	23.7037	24.7356	24.3635	NaN	25.3178	25.6595	25.29	NaN	24.1811	NaN
179	Q9AUQ4	Phosphoglucomutase (alpha-D-glucose-1,6-bisphosphate-dependent) (EC 5.4.2.2)	S	124	GADGSKATGAFILTASHNPGGPTEDFGIKYN		0.99737	27.6798	NaN	27.6727	NaN	27.3619	NaN	26.9304	28.1526	29.0819	NaN	27.0869	26.5956
180	Q9AY66	Reticulon-like protein	S	29	SSIMDTIAENLPKQKSGKFDVGAASDKMKEK	Calmodulin-dependent protein kinase II substrate motif;Chk1 kinase substrate motif;PKA kinase substrate motif;PKC kinase substrate motif	0.999992	23.7618	23.81	NaN	24.957	23.4967	NaN	NaN	NaN	21.038	NaN	NaN	23.877
181	Q9FP98	Os01g0626300 protein	S	20	PSLKPKPKVKGARKGSPAADEEQSTAAAAVR	14-3-3 domain binding motif;Calmodulin-dependent protein kinase II substrate motif;ERK1,2 kinase substrate motif;GSK-3, ERK1, ERK2, CDK5 substrate motif;PKA kinase substrate motif;PKC epsilon kinase substrate motif;PKC kinase substrate motif;WW domain binding motif	0.998802	26.4837	NaN	25.7272	26.8437	26.1793	26.7816	26.9835	NaN	26.9032	26.1133	NaN	27.0957
182	P0C2Z3	ATP synthase epsilon chain, chloroplastic (ATP synthase F1 sector epsilon subunit) (F-ATPase epsilon subunit)	T	110	QALEIAEANVSRAEGTKELVEAKVALRRARI		1	24.0003	23.5677	24.6977	NaN	22.8169	NaN	NaN	25.3935	NaN	NaN	NaN	25.1833
183	P0C422	Photosystem II reaction center protein H (PSII-H) (Photosystem II 10 kDa phosphoprotein)	T	3	_____________MATQTVEDSSRPGPRQTR		1	26.787	24.5931	23.5705	25.1699	24.0419	25.4977	NaN	24.3523	29.7157	28.7278	24.998	22.273
184	P0C422	Photosystem II reaction center protein H (PSII-H) (Photosystem II 10 kDa phosphoprotein)	T	5	___________MATQTVEDSSRPGPRQTRVG	Casein kinase II substrate motif;G protein-coupled receptor kinase 1 substrate motif	0.999762	NaN	25.2226	24.5454	25.7473	NaN	25.4145	27.3861	NaN	27.5453	26.7255	24.094	NaN
185	P0C434	Photosystem II protein D1 (PSII D1 protein) (EC 1.10.3.9) (Photosystem II Q(B) protein)	T	2	______________MTAILERRESTSLWGRF		1	24.1174	26.2693	NaN	27.2385	28.1706	NaN	NaN	NaN	22.873	NaN	27.2619	NaN
186	P0C512	Ribulose bisphosphate carboxylase large chain (RuBisCO large subunit) (EC 4.1.1.39)	T	173	ERDKLNKYGRPLLGCTIKPKLGLSAKNYGRA	PKA kinase substrate motif;PKC kinase substrate motif	1	22.7895	30.122	29.944	28.0172	26.1335	29.8668	25.6188	NaN	NaN	NaN	28.5159	27.1777
187	P12330	Chlorophyll a-b binding protein 1, chloroplastic (LHCII type I CAB-1) (LHCP)	T	35	TSSALFGEARITMRKTAAKPKPAASSGSPWY	G protein-coupled receptor kinase 1 substrate motif;PKA kinase substrate motif;PKC kinase substrate motif	1	31.2632	31.2977	31.7263	31.7615	29.6962	31.4129	30.7659	31.2563	29.9664	30.8852	30.3343	30.7244
188	A0A0N7KMN9	Os06g0701100 protein (Fragment)	T	133	LGDYLGVKVHACVGGTSVREDQRILASGVHV		0.888538	25.7525	27.9815	28.2107	27.8046	27.7943	28.0626	27.6214	26.8798	27.5185	24.7166	28.0823	28.5295
189	Q6Z1V4	Photosystem II reaction center protein L (PSII-L)	T	2	______________MTQSNPNEQNVELNRTS	G protein-coupled receptor kinase 1 substrate motif	0.999803	27.14	27.5121	26.3355	25.9988	25.6911	26.8937	27.2472	26.4619	25.2475	27.656	26.3383	28.0419
190	Q6AVA8	Pyruvate, phosphate dikinase 1, chloroplastic (EC 2.7.9.1) (OsPPDKB) (Pyruvate, orthophosphate dikinase 1)	T	527	GMHAAVGILTARGGMTSHAAVVARGWGKCCV;GMNAAAGILTARGGMTSHAAVVARGWGKCCV	G protein-coupled receptor kinase 1 substrate motif;G protein-coupled receptor kinase 1 substrate motif	0.989822	28.3918	27.8297	29.651	29.4733	27.1873	30.0088	27.0482	27.7593	29.4495	26.2429	27.8769	27.3922
191	Q6AVI0	Zinc finger BED domain-containing protein RICESLEEPER 2 (Transposase-like protein RICESLEEPER 2)	T	137	IKNQEHKLALTPAVGTDNDGEGTVERPSKRR	Casein kinase II substrate motif	0.974816	NaN	27.2962	27.387	27.3184	26.9492	27.0157	24.3911	NaN	NaN	24.287	NaN	27.2002
192	Q7XPY2	Plasma membrane ATPase (EC 7.1.2.1) (Proton pump)	T	950	VKLKGLDIDTIQQNYTV______________	14-3-3 domain binding motif	0.999627	28.0032	26.115	26.935	27.7062	NaN	27.7269	28.2898	NaN	NaN	NaN	27.0673	26.8688
193	Q7XPY2	Plasma membrane ATPase (EC 7.1.2.1) (Proton pump)	T	881	YGREEREAQWATAQRTLHGLQPPEVASNTLF		1	27.9432	27.237	27.4385	28.0288	27.5012	28.1041	26.4195	26.2337	26.6966	26.4713	26.085	26.2729
194	Q943K1	Photosystem II 22 kDa protein 1, chloroplastic (22 kDa protein of photosystem II 1) (Photosystem II subunit 1) (OsPsbS1)	T	75	KAAPARKAEPKPKFKTEDGIFGTSGGIGFTK	G protein-coupled receptor kinase 1 substrate motif;PKA kinase substrate motif;PKC kinase substrate motif	0.998293	25.8685	23.9937	26.2363	NaN	NaN	26.0455	NaN	NaN	25.7705	NaN	NaN	25.6104
195	Q943K1	Photosystem II 22 kDa protein 1, chloroplastic (22 kDa protein of photosystem II 1) (Photosystem II subunit 1) (OsPsbS1)	T	165	GALGDRGSFVDDQPVTGLDKAVIAPGKGFRS	Casein kinase II substrate motif	0.999999	26.6094	26.3832	25.1165	NaN	25.0929	26.2804	26.6652	26.0402	24.815	26.7806	25.4877	26.2387
196	A0A0N7KG12	Os02g0729400 protein (Fragment)	T	310	VTPSRVIPAAADRLVTASSSASRTTTSRKLL	Calmodulin-dependent protein kinase II substrate motif;Casein kinase II substrate motif;G protein-coupled receptor kinase 1 substrate motif;PKC kinase substrate motif	0.99989	26.9712	30.2221	30.2683	29.0589	26.2537	29.9045	28.7213	29.1379	28.1029	29.6547	30.1261	29.5098
197	A0A0P0V7R2	Os01g0730300 protein (Fragment)	T	50	AGGRPPRARRMQRTMTTPGTLAELDEERAGS	Calmodulin-dependent protein kinase II substrate motif;Calmodulin-dependent protein kinase IV substrate motif;Chk1 kinase substrate motif;G protein-coupled receptor kinase 1 substrate motif;PKC kinase substrate motif	0.851859	24.1553	24.1595	24.6967	NaN	NaN	24.6326	NaN	NaN	NaN	NaN	NaN	24.4184
198	A0A0P0VRF7	Os02g0819300 protein	T	294	HNFASAVGSSISRSTTPDPQLIRRTPSPCLP	Calmodulin-dependent protein kinase II substrate motif;Calmodulin-dependent protein kinase IV substrate motif;Chk1 kinase substrate motif;GSK-3, ERK1, ERK2, CDK5 substrate motif;MAPKAPK2 kinase substrate motif;PKC kinase substrate motif;WW domain binding motif	0.863008	25.512	22.981	25.6707	25.8356	NaN	25.4922	NaN	NaN	24.0033	25.2501	NaN	25.7508
199	Q75G93	Mps one binder kinase activator-like 1A, putative, expressed (Os03g0577200 protein) (cDNA clone:001-038-D08, full insert sequence) (cDNA clone:006-305-C06, full insert sequence) (cDNA clone:J013034B14, full insert sequence) (cDNA clone:J013058M06, full insert sequence)	T	35	PSGSKGAQLRKHIDATLGSGNLREAVRLPPG	Casein kinase II substrate motif	0.998761	24.7509	NaN	24.5866	24.9777	23.8745	NaN	24.5033	24.8059	25.5187	NaN	25.2707	25.7217
200	A0A0P0WH17	Os04g0692900 protein (Fragment)	T	95	DHHPLTLCGASRDVDTETDEPRTKKPRATNS	b-Adrenergic Receptor kinase substrate motif;Casein kinase I substrate motif;Casein kinase II substrate motif;G protein-coupled receptor kinase 1 substrate motif	0.880592	23.0195	23.0815	NaN	NaN	NaN	22.6525	23.1745	NaN	NaN	21.6833	NaN	NaN
201	Q5SMK6	Probable protein phosphatase 2C 54 (OsPP2C54) (EC 3.1.3.16)	S	346	PQVRVSRPGRVARSISAEGLNSLRTLLRNQ_	14-3-3 domain binding motif;Calmodulin-dependent protein kinase I substrate motif;Calmodulin-dependent protein kinase II substrate motif;Calmodulin-dependent protein kinase IV substrate motif;Casein kinase II substrate motif;Chk1 kinase substrate motif;PKA kinase substrate motif;PKC kinase substrate motif	0.995394	23.9655	23.4091	NaN	NaN	NaN	23.6229	NaN	22.0265	NaN	23.1949	22.4273	22.3712
202	A0A0P0WKD6	Os05g0291700 protein	T	440	ATQDSDEVEPKAQIATVRGQAKAKKLAPQRA	PKA kinase substrate motif;PKC kinase substrate motif	1	28.1958	30.5614	30.5146	30.7726	27.4101	30.1149	30.5839	29.8039	28.7395	30.6395	30.2605	30.1372
203	A0A0P0WKD6	Os05g0291700 protein	T	426	DFSWEKLSTQLAGVATQDSDEVEPKAQIATV	Casein kinase II substrate motif	0.999629	25.7888	28.7767	28.9408	28.7038	26.9745	28.5508	29.1104	28.3516	28.0196	28.8873	28.8476	28.7389
204	A0A0P0WKD6	Os05g0291700 protein	T	375	ETRASQRTRQAEEDTTTVKAGGKKTPSDEAA	Casein kinase I substrate motif;G protein-coupled receptor kinase 1 substrate motif	0.755897	17.2309	NaN	20.4947	21.4046	NaN	NaN	23.6119	NaN	NaN	26.9066	20.5319	NaN
205	A0A0P0X3D0	Plasma membrane ATPase (EC 7.1.2.1) (Fragment)	T	743	FGTQENQLKWATAQRTIHGLQPAATAAVFRD		0.999999	25.6509	24.1713	25.0232	25.4917	26.0825	NaN	NaN	NaN	27.1061	22.5554	23.2153	NaN
206	A0A0P0X4N7	Os07g0243150 protein (Fragment)	T	28	PPSARVARPSATKSVTAAAATEEKGLFDAIF	G protein-coupled receptor kinase 1 substrate motif;PKA kinase substrate motif;PKC kinase substrate motif	0.999666	29.9781	29.1318	26.3684	28.4322	27.0233	28.5791	29.3361	27.8135	26.8913	28.1332	28.4302	30.4591
207	A0A0P0XQ33	NADH dehydrogenase [ubiquinone] 1 alpha subcomplex subunit 12	T	149	DQRKGHDEVSRSKDGTDTEDATIDTDRSSEP	Casein kinase II substrate motif;MAPKAPK2 kinase substrate motif;PKA kinase substrate motif;PKC kinase substrate motif	0.848904	26.9406	25.7442	25.4358	NaN	25.3827	NaN	NaN	26.3834	NaN	26.4045	NaN	24.4318
208	A0A0P0XQR1	Os09g0568000 protein (Fragment)	T	153	NRLGEGPEITLERSLTTASSSSRVNRNKTEK	Calmodulin-dependent protein kinase II substrate motif;Calmodulin-dependent protein kinase IV substrate motif;Casein kinase II substrate motif;Chk1 kinase substrate motif;G protein-coupled receptor kinase 1 substrate motif;PKC kinase substrate motif	0.98329	19.3664	25.3837	23.1228	NaN	22.9509	24.1103	25.0865	24.3629	NaN	24.6366	23.6995	NaN
209	B7F8F6	Os01g0180700 protein (cDNA, clone: J065037E24, full insert sequence)	T	479	RNMKNDEDVMRPGQLTPRSMTKKTMRQRPTS	Casein kinase II substrate motif;Growth associated histone HI kinase substrate motif;GSK-3, ERK1, ERK2, CDK5 substrate motif;PKA kinase substrate motif;PKC kinase substrate motif;RAF1 kinase substrate motif;WW domain binding motif	1	NaN	26.2	23.9469	25.613	NaN	NaN	NaN	26.235	NaN	NaN	NaN	25.8706
210	Q0D3C0	Os07g0694500 protein	T	260	LDDSDEDWDPRKKGATDSDSEVDFDRKRVSK	Casein kinase II substrate motif;G protein-coupled receptor kinase 1 substrate motif;PKA kinase substrate motif;PKC kinase substrate motif	0.982705	24.0874	24.1121	24.0414	NaN	NaN	23.967	NaN	24.2414	NaN	NaN	NaN	25.1267
211	Q5Z627	Elongation factor 1-gamma 3 (EF-1-gamma 3) (eEF-1B gamma 3)	S	246	KKEAPKEAPKPKVEASEEEEAPKPKPKNPLD	BARD1 BRCT domain binding motif;Casein kinase II substrate motif;G protein-coupled receptor kinase 1 substrate motif;PKA kinase substrate motif	1	25.797	25.5573	25.5182	NaN	NaN	25.3709	NaN	NaN	26.3252	26.0514	25.3127	25.0056
212	Q0DG76	Os05g0549100 protein	T	534	NLLASVLRVQRKVVRTINESMDELSSQSKSI	Casein kinase II substrate motif;G protein-coupled receptor kinase 1 substrate motif;PKA kinase substrate motif	1	27.9273	28.3855	27.0306	27.8224	26.8712	27.0555	29.2339	27.515	26.7572	27.664	NaN	26.8274
213	Q0IZR7	Os09g0553900 protein (cDNA clone:J013042N12, full insert sequence)	T	489	GKTEDTRDGDAAALDTDEEEVTREFLQLLEQ	b-Adrenergic Receptor kinase substrate motif;Casein kinase II substrate motif	0.977078	NaN	26.2433	NaN	26.4477	25.7275	26.4722	NaN	NaN	NaN	25.8516	NaN	25.8941
214	Q0IZR7	Os09g0553900 protein (cDNA clone:J013042N12, full insert sequence)	T	338	FSITSPKVSRSEPKLTPTKGSPSPDLRGIDD	Cdc2 kinase substrate motif;CDK1,2,4,6 kinase substrate motif;CDK5 kinase substrate motif;GSK-3, ERK1, ERK2, CDK5 substrate motif;PKA kinase substrate motif;PKC kinase substrate motif;RAF1 kinase substrate motif;WW domain binding motif	0.95825	27.0232	26.9915	27.2762	NaN	26.2401	26.8992	NaN	26.8485	26.9874	NaN	NaN	NaN
215	Q0JLN9	Os01g0585300 protein (cDNA clone:J023103B06, full insert sequence)	T	81	EVDVFKKLERRKVLSTVEKAGLLSRAEELGV	G protein-coupled receptor kinase 1 substrate motif;MDC1 BRCT domain binding motif;PKA kinase substrate motif;Plk1 PBD domain binding motif	0.820598	26.2359	25.1516	25.8454	26.3113	NaN	24.7612	NaN	24.2474	NaN	24.9155	NaN	25.387
216	Q10RZ6	Expressed protein (Os03g0140700 protein) (cDNA clone:J023039B07, full insert sequence)	T	51	SPTVSYHPPTISCRLTPGGSDAHDRSLGGLR	G protein-coupled receptor kinase 1 substrate motif;GSK-3, ERK1, ERK2, CDK5 substrate motif;MAPKAPK2 kinase substrate motif;PKA kinase substrate motif;PKC kinase substrate motif;RAF1 kinase substrate motif;WW domain binding motif	0.999672	21.9559	24.9795	NaN	NaN	NaN	22.8163	NaN	23.3381	NaN	25.2432	23.2989	NaN
217	Q2QM23	Methyl-CpG binding domain containing protein, expressed (Os12g0620400 protein) (cDNA clone:001-020-H05, full insert sequence) (cDNA clone:J023126H05, full insert sequence)	T	197	EMKTAEDASKTADADTPAPAPAGTEKEDAKP	b-Adrenergic Receptor kinase substrate motif;Casein kinase I substrate motif;G protein-coupled receptor kinase 1 substrate motif;GSK-3, ERK1, ERK2, CDK5 substrate motif;WW domain binding motif	0.992292	26.4336	25.6594	24.4308	NaN	NaN	25.1583	NaN	24.0866	NaN	NaN	NaN	NaN
218	Q2QN86	Expressed protein (Os12g0575000 protein) (cDNA clone:001-107-F10, full insert sequence) (cDNA clone:006-208-A11, full insert sequence)	T	47	AAMATQKPTSGTRRGTTVYFPVGEPGPRQTT	Calmodulin-dependent protein kinase II substrate motif;Casein kinase II substrate motif;PAK2 kinase substrate motif;PKA kinase substrate motif;PKC kinase substrate motif	0.951735	NaN	24.4633	NaN	NaN	NaN	NaN	NaN	27.0762	26.5882	NaN	24.9509	23.7733
219	Q53N83	Chlorophyll a-b binding protein, chloroplastic	T	52	LFSKKPAPKPKPAAVTSSSPDIGDELAKWYG	Casein kinase II substrate motif;G protein-coupled receptor kinase 1 substrate motif	0.991355	30.5573	30.6545	31.0546	30.8645	29.5805	30.7723	31.0393	30.4452	29.475	31.139	30.4381	30.5835
220	Q5Z6F0	Probable aquaporin TIP2-2 (Tonoplast intrinsic protein 2-2) (OsTIP2;2)	S	2	______________MSGNIAFGRFDDSFSAA	G protein-coupled receptor kinase 1 substrate motif	1	26.1492	27.1735	NaN	25.0226	NaN	26.3439	26.699	25.7682	26.2409	26.6816	25.4235	25.536
221	Q5KQD2	Os05g0548100 protein (cDNA clone:001-008-B08, full insert sequence) (cDNA clone:J023113L22, full insert sequence)	T	176	AAADAEDEDEAAAPATPSKEAEVGYHGLMAA	Cdc2 kinase substrate motif;CDK1,2,4,6 kinase substrate motif;CDK5 kinase substrate motif;ERK1,2 kinase substrate motif;GSK3, Erk1, Erk2 and CDK5 kinase motif;GSK-3, ERK1, ERK2, CDK5 substrate motif;WW domain binding motif	0.895063	27.8874	27.0059	25.9135	26.8886	26.3728	27.2082	25.3881	27.1583	NaN	26.9532	25.7364	26.8147
222	Q5TKJ2	Os05g0429400 protein	T	206	AKPAEPETEEKTVVVTEDEGTSKTVEAIEET	Casein kinase II substrate motif;G protein-coupled receptor kinase 1 substrate motif	0.782489	23.8526	23.2561	NaN	NaN	NaN	23.3343	NaN	NaN	NaN	NaN	NaN	NaN
223	Q5Z7T2	Os06g0714200 protein	T	51	TPPRQQAQAQAQQVGTPRRRGSKSGSTTPGH	Cdc2 kinase substrate motif;CDK1,2,4,6 kinase substrate motif;Growth associated histone HI kinase substrate motif;GSK-3, ERK1, ERK2, CDK5 substrate motif;PKA kinase substrate motif;PKC kinase substrate motif;WW domain binding motif	1	28.4033	27.2937	26.7705	28.1058	NaN	27.7967	NaN	NaN	26.6926	26.9144	26.5932	27.3065
224	Q5Z904	Os06g0562700 protein	T	392	RERDRKHPADSRREHTPPRTPGDRRRSSSVR	Calmodulin-dependent protein kinase II substrate motif;Cdc2 kinase substrate motif;CDK1,2,4,6 kinase substrate motif;CLK1 kinase substrate motif;G protein-coupled receptor kinase 1 substrate motif;GSK-3, ERK1, ERK2, CDK5 substrate motif;PKC kinase substrate motif;WW domain binding motif	0.998866	21.602	23.4486	21.1984	NaN	NaN	22.9796	NaN	24.3344	NaN	NaN	NaN	24.2594
225	Q5Z990	Os06g0724600 protein (cDNA clone:J033121H17, full insert sequence)	T	148	GRNITVEKSRRGRPRTPTPGSYLGHRYDRRE	Akt kinase substrate motif;Calmodulin-dependent protein kinase II substrate motif;ERK1,2 kinase substrate motif;Growth associated histone HI kinase substrate motif;GSK3, Erk1, Erk2 and CDK5 kinase motif;GSK-3, ERK1, ERK2, CDK5 substrate motif;PKC kinase substrate motif;WW domain binding motif	0.93812	25.5384	24.9935	24.6583	25.4985	23.6475	NaN	NaN	24.8532	26.5607	23.9895	23.3573	25.0168
226	Q6ES98	Os09g0346700 protein (cDNA clone:J023062D09, full insert sequence)	T	108	SSANASSSPSLQRSLTSAAASKMKKALGLRS	Calmodulin-dependent protein kinase II substrate motif;Calmodulin-dependent protein kinase IV substrate motif;Chk1 kinase substrate motif;G protein-coupled receptor kinase 1 substrate motif;PKC kinase substrate motif	0.955118	25.1784	24.5795	24.438	24.002	NaN	24.866	25.0652	NaN	NaN	NaN	NaN	NaN
227	Q5Z9S8	ABC transporter G family member 42 (OsABCG42) (Pleiotropic drug resistance protein 12) (OsPDR12)	S	873	ARLSNSSSNGVSRLMSIGSNEAGPRRGMVLP	14-3-3 domain binding motif;Calmodulin-dependent protein kinase II alpha substrate motif;Calmodulin-dependent protein kinase II substrate motif;Calmodulin-dependent protein kinase IV substrate motif;Casein kinase II substrate motif;Chk1 kinase substrate motif;MAPKAPK2 kinase substrate motif;Phosphorylase kinase substrate motif;PKA kinase substrate motif;PKC kinase substrate motif	0.999987	25.1595	25.6517	24.7702	25.7525	NaN	25.5364	23.697	25.3188	NaN	23.9921	NaN	24.1743
228	Q6K4P1	Eukaryotic translation initiation factor 3 subunit G (eIF3g) (Eukaryotic translation initiation factor 3 RNA-binding subunit) (eIF-3 RNA-binding subunit) (Eukaryotic translation initiation factor 3 subunit 4)	T	169	KDLAPQTEAFVDRPPTADGSGPPGGAVKGAY	Calmodulin-dependent protein kinase II substrate motif;Calmodulin-dependent protein kinase IV substrate motif;Chk1 kinase substrate motif;DNA dependent Protein kinase substrate motif;G protein-coupled receptor kinase 1 substrate motif;PKC kinase substrate motif	0.98893	27.386	25.5188	27.4627	27.515	27.1585	27.6386	26.958	25.8641	26.7843	NaN	27.129	27.3439
229	Q6Z3Y9	Phosphoinositide phospholipase C (EC 3.1.4.11)	T	273	KPPREYLQAKDGNAATIKEDAKAAATDDAAW	Casein kinase II substrate motif;PKA kinase substrate motif;PKC kinase substrate motif	1	24.3747	28.3401	27.4893	29.541	27.9556	27.8773	28.2813	27.344	27.4816	27.9642	28.0323	28.1332
230	Q6Z411	Chlorophyll a-b binding protein, chloroplastic	T	115	LAKNNAGEIIGTRFETGEVKSTPFQPYTEVF	b-Adrenergic Receptor kinase substrate motif;Calmodulin-dependent protein kinase II substrate motif;PKC kinase substrate motif	1	27.534	27.6223	27.5869	27.6667	26.7069	27.2329	27.9754	26.8043	25.0648	24.3167	27.3969	27.5929
231	Q6Z411	Chlorophyll a-b binding protein, chloroplastic	T	111	LDQNLAKNNAGEIIGTRFETGEVKSTPFQPY	Casein kinase II substrate motif;G protein-coupled receptor kinase 1 substrate motif	1	26.865	26.4584	26.4113	27.7225	27.3056	26.8936	26.5483	28.5268	28.2151	26.6963	26.8217	25.8107
232	Q7EZ28	Os07g0507300 protein	T	474	SISGTVVRNQIEEPETPRSSRSRLGIQEKSP	b-Adrenergic Receptor kinase substrate motif;Casein kinase I substrate motif;Casein kinase II substrate motif;ERK1,2 kinase substrate motif;G protein-coupled receptor kinase 1 substrate motif;Growth associated histone HI kinase substrate motif;GSK3, Erk1, Erk2 and CDK5 kinase motif;GSK-3, ERK1, ERK2, CDK5 substrate motif;PKA kinase substrate motif;PKC kinase substrate motif;WW domain binding motif	1	25.1263	25.6083	23.6594	25.4725	24.6199	25.4399	24.4238	NaN	24.5542	24.511	NaN	24.7767
233	Q9SNK3	Glyceraldehyde-3-phosphate dehydrogenase (EC 1.2.1.-)	T	289	LRRARAAALNIVPTSTGAAKAVALVLPNLKG;LRRARAAALNIVPTSTGAAKAVALVLPQLKG	MDC1 BRCT domain binding motif;MDC1 BRCT domain binding motif;Plk1 PBD domain binding motif;Plk1 PBD domain binding motif	0.802555	24.6473	25.8478	25.3706	27.2123	NaN	26.1098	NaN	NaN	24.596	NaN	NaN	24.6524
234	Q7XV11	Chlorophyll a-b binding protein, chloroplastic	T	175	NPDSQAVEWATPWSRTAENFSNATGEQGYPG		0.998589	25.8712	26.8998	26.3484	25.9807	24.0885	NaN	26.8748	NaN	NaN	26.9392	26.0165	26.5716
235	Q5ZCK5	Probable calcium-binding protein CML16 (Calmodulin-like protein 16)	S	44	ERVFTRFDADGDGRISPSELAAVTRAIAPPP	Casein kinase II substrate motif;ERK1,2 kinase substrate motif;GSK-3, ERK1, ERK2, CDK5 substrate motif;PKA kinase substrate motif;PKC kinase substrate motif;WW domain binding motif	0.964934	26.1916	23.9454	24.9578	NaN	NaN	23.9739	NaN	24.5102	NaN	NaN	NaN	24.6575
236	Q8L6I1	Plasma membrane ATPase (EC 7.1.2.1)	T	889	FGKEERELKWAHAQRTLHGLQPPDAKMFSEK		1	26.1144	25.9468	25.3005	NaN	24.2562	25.4464	24.9951	24.1494	26.3432	26.0474	25.697	26.0804
237	Q8S1T0	Os01g0835500 protein	T	627	EAQVTSKKATLSRLETTVVADAQTEDTRFPK	b-Adrenergic Receptor kinase substrate motif;Calmodulin-dependent protein kinase II substrate motif;Calmodulin-dependent protein kinase IV substrate motif;Chk1 kinase substrate motif;G protein-coupled receptor kinase 1 substrate motif;MAPKAPK2 kinase substrate motif;PKC kinase substrate motif	0.962336	24.2359	24.9241	24.3131	25.7542	24.8736	25.6031	NaN	NaN	NaN	NaN	24.7515	23.688
238	Q6EUS4	Non-specific serine/threonine protein kinase (EC 2.7.11.1)	Y	234	FGSAKMLVKGEANISYICSRYYRAPELIFGA	ALK kinase substrate motif;FRIP PTB domain binding motif	0.871826	22.2127	23.5045	23.2755	24.2185	22.8329	NaN	22.4177	NaN	NaN	22.4122	22.0563	22.3894
239	A0A0P0XD36	Os08g0224200 protein	Y	71	FVTEYKDAKFFVIKSYTEDHVHRSIKYNVWA	Src kinase substrate motif	0.91247	24.072	23.8667	24.9862	24.4265	NaN	24.614	23.6839	NaN	NaN	NaN	NaN	NaN
240	B9FXV5	Eukaryotic translation initiation factor 4G (eIF-4G) (eIF4G) (Eukaryotic initiation factor 4F subunit p220) (eIF-4F p220 subunit)	S	1065	LFPNLAGKSYVVDHPSPGRGADRPASRGDRR	Casein kinase I substrate motif;Cdc2 kinase substrate motif;CDK kinase substrate motif;CDK1,2,4,6 kinase substrate motif;DNA dependent Protein kinase substrate motif;ERK1,2 kinase substrate motif;GSK-3, ERK1, ERK2, CDK5 substrate motif;WW domain binding motif	0.999696	NaN	NaN	NaN	NaN	NaN	NaN	NaN	NaN	24.5728	22.9254	NaN	22.8968
241	Q67U26	Villin-3	S	808	NALAANFENPNARNLSTPPPAIRKPSPKSPS	14-3-3 domain binding motif;Calmodulin-dependent protein kinase II substrate motif;G protein-coupled receptor kinase 1 substrate motif;MAPKAPK2 kinase substrate motif;PKA kinase substrate motif;PKC kinase substrate motif	0.976277	NaN	NaN	NaN	24.4653	23.8995	23.7254	NaN	NaN	NaN	NaN	NaN	NaN
242	Q69QZ0	Probable protein phosphatase 2C 27 (OsPP2C27) (EC 3.1.3.16)	S	340	PQLRVNRTGRVERSISAEGLHSLRVLLEGQ_	14-3-3 domain binding motif;Calmodulin-dependent protein kinase I substrate motif;Calmodulin-dependent protein kinase II substrate motif;Calmodulin-dependent protein kinase IV substrate motif;Casein kinase II substrate motif;Chk1 kinase substrate motif;PKA kinase substrate motif;PKC kinase substrate motif	0.99836	23.2039	23.4798	25.1052	24.0932	NaN	24.6352	NaN	NaN	NaN	NaN	NaN	NaN
243	Q6EPQ3	SPX domain-containing membrane protein Os02g45520	S	456	NSVNTPSSDSGHRRNSNLEDGLAQPFLIDAK	14-3-3 domain binding motif;Calmodulin-dependent protein kinase II substrate motif;Casein kinase II substrate motif;PAK2 kinase substrate motif;PKA kinase substrate motif;PKA, PKG kinase substrate motif;PKC epsilon kinase substrate motif;PKC kinase substrate motif;PKG kinase substrate motif	1	23.5954	23.5556	24.3178	23.3537	24.7144	NaN	NaN	NaN	24.811	NaN	24.1417	NaN
244	Q6EU14	Protein argonaute 1A (OsAGO1a)	S	134	MPQHRSGSGGHGVPASPSRTVPELHQASQDQ	Casein kinase II substrate motif;Cdc2 kinase substrate motif;CDK kinase substrate motif;CDK1,2,4,6 kinase substrate motif;ERK1,2 kinase substrate motif;G protein-coupled receptor kinase 1 substrate motif;GSK-3, ERK1, ERK2, CDK5 substrate motif;WW domain binding motif	0.972957	NaN	23.6932	NaN	24.7034	22.4095	23.8471	NaN	24.5249	NaN	23.6564	23.2381	24.3603
245	Q6K271	Flowering time control protein FCA (OsFCA) (rFCA)	S	45	GPSRWSSGGGGGGSGSPPHRFSRGGGGGGGD	ERK1,2 kinase substrate motif;GSK-3, ERK1, ERK2, CDK5 substrate motif;WW domain binding motif	0.857087	27.2457	25.8303	26.3549	NaN	NaN	27.0469	NaN	NaN	26.8807	NaN	26.0711	27.8804
246	A0A0P0W8S4	Os04g0304200 protein (Fragment)	S	133	ARAPADAALLTPPKMSDADKMAAMSPVVAPG	Casein kinase II substrate motif;PKA kinase substrate motif;PKC kinase substrate motif;Pyruvate dehydrogenase kinase substrate motif	1	25.0928	25.2486	26.0093	NaN	NaN	26.0764	25.1799	NaN	26.6453	25.8039	25.0338	26.4436
247	A0A0P0VS07	Os02g0831100 protein (Fragment)	S	154	LQPEKERDRGPRARLSPPSQTDLRGKLHDRL	Casein kinase II substrate motif;ERK1,2 kinase substrate motif;GSK-3, ERK1, ERK2, CDK5 substrate motif;PKA kinase substrate motif;PKC kinase substrate motif;WW domain binding motif	0.971039	24.8217	24.0115	24.2165	NaN	NaN	24.4674	NaN	22.8929	NaN	NaN	NaN	NaN
248	A0A0P0VS07	Os02g0831100 protein (Fragment)	S	276	DSGNATDFGSKREEHSGGDEEGSQNDFRNIE	Casein kinase I substrate motif;Casein kinase II substrate motif;Pyruvate dehydrogenase kinase substrate motif	0.99976	25.0776	NaN	23.904	NaN	NaN	24.6131	NaN	25.0215	24.5119	NaN	NaN	24.2984
249	A0A0P0UYI5	Os01g0147200 protein	S	47	DDLEDDLGDDWNRGRSPTPVHGDDGAGSSSK	14-3-3 domain binding motif;Calmodulin-dependent protein kinase II substrate motif;Casein kinase II substrate motif;ERK1,2 kinase substrate motif;Growth associated histone HI kinase substrate motif;GSK-3, ERK1, ERK2, CDK5 substrate motif;PKA kinase substrate motif;PKC kinase substrate motif;WW domain binding motif	0.999986	NaN	22.6832	23.4783	NaN	NaN	24.8778	NaN	26.7949	NaN	23.7541	24.9545	26.9627
250	Q6Z5N4	Pyruvate dehydrogenase E1 component subunit alpha-1, mitochondrial (PDHE1-A) (EC 1.2.4.1)	S	293	GPIVLEMDTYRYHGHSMSDPGSTYRTRDEIS	Casein kinase II substrate motif;G protein-coupled receptor kinase 1 substrate motif;Pyruvate dehydrogenase kinase substrate motif	0.863083	26.9558	28.309	26.2022	27.6359	24.1624	NaN	28.1965	28.7646	29.4402	NaN	28.6145	NaN
251	P0DKK8	40S ribosomal protein S10-1	S	155	DFGGEKGGAPAEFQPSFRSSGGRPGFGRGGG	Casein kinase II substrate motif;DNA dependent Protein kinase substrate motif;G protein-coupled receptor kinase 1 substrate motif;GSK3 kinase substrate motif;PKA kinase substrate motif;PKC kinase substrate motif	1	23.9042	24.0899	24.1183	24.7871	23.9707	NaN	NaN	24.4483	25.8461	NaN	24.2979	NaN
252	Q6ZHZ1	Probable sucrose-phosphate synthase 4 (EC 2.4.1.14) (Sucrose phosphate synthase 4F) (OsSPS4F) (UDP-glucose-fructose-phosphate glucosyltransferase)	S	719	EADSPGDSLRDVHDISLNLKLSLDSEKSSTK		1	26.2572	24.8	25.3921	NaN	24.7629	24.6804	24.7705	NaN	NaN	24.8422	24.9614	24.5017
253	Q6ZHZ1	Probable sucrose-phosphate synthase 4 (EC 2.4.1.14) (Sucrose phosphate synthase 4F) (OsSPS4F) (UDP-glucose-fructose-phosphate glucosyltransferase)	S	170	STHDESTRGRMPRIGSTDAIEAWASQHKDKK	14-3-3 domain binding motif;Calmodulin-dependent protein kinase I substrate motif;Calmodulin-dependent protein kinase II substrate motif;Calmodulin-dependent protein kinase IV substrate motif;Chk1 kinase substrate motif;PKA kinase substrate motif;PKC kinase substrate motif	0.899201	26.5084	26.1355	27.4238	27.1736	27.165	26.6078	24.8608	27.3893	25.1757	25.3518	25.1904	NaN
254	A0A0P0X1C3	Os06g0728600 protein	S	805	EPDATPSDSKTVAAKSPPVSPVKNTKDGHSD	ERK1, ERK2, SAPK, CDK5 and GSK3 kinase substrate motif;ERK1,2 kinase substrate motif;G protein-coupled receptor kinase 1 substrate motif;Growth associated histone HI kinase substrate motif;GSK3 kinase substrate motif;GSK-3, ERK1, ERK2, CDK5 substrate motif;WW domain binding motif	0.999952	26.479	25.4963	23.6264	NaN	25.2447	25.6903	24.9349	26.3877	NaN	25.707	23.23	25.832
255	A0A0P0X1C3	Os06g0728600 protein	S	809	TPSDSKTVAAKSPPVSPVKNTKDGHSDERDK	Cdc2 kinase substrate motif;CDK kinase substrate motif;CDK1,2,4,6 kinase substrate motif;ERK1,2 kinase substrate motif;GSK-3, ERK1, ERK2, CDK5 substrate motif;MAPKAPK2 kinase substrate motif;WW domain binding motif	0.999994	26.479	25.4963	23.6264	NaN	25.2447	25.6903	24.9349	26.3877	NaN	25.707	23.23	25.832
256	Q6ZHZ1	Probable sucrose-phosphate synthase 4 (EC 2.4.1.14) (Sucrose phosphate synthase 4F) (OsSPS4F) (UDP-glucose-fructose-phosphate glucosyltransferase)	S	707	RWQKSDDATEVSEADSPGDSLRDVHDISLNL	b-Adrenergic Receptor kinase substrate motif;Casein kinase I substrate motif;Casein kinase II substrate motif;ERK1,2 kinase substrate motif;G protein-coupled receptor kinase 1 substrate motif;GSK3 kinase substrate motif;GSK-3, ERK1, ERK2, CDK5 substrate motif;MAPKAPK2 kinase substrate motif;Pyruvate dehydrogenase kinase substrate motif;WW domain binding motif	0.995279	27.1012	27.6339	27.8016	27.5301	27.1385	27.7525	27.702	27.7717	27.9662	27.3677	27.3312	27.713
257	Q6ZHZ1	Probable sucrose-phosphate synthase 4 (EC 2.4.1.14) (Sucrose phosphate synthase 4F) (OsSPS4F) (UDP-glucose-fructose-phosphate glucosyltransferase)	S	86	ETDLYKTWVRTAAMRSPQERNTRLENMSWRI	Casein kinase II substrate motif;ERK1,2 kinase substrate motif;Growth associated histone HI kinase substrate motif;GSK-3, ERK1, ERK2, CDK5 substrate motif;WW domain binding motif	0.999968	NaN	NaN	NaN	27.1026	25.6368	NaN	NaN	NaN	NaN	NaN	NaN	NaN
258	Q6ZKL8	Probable protein phosphatase 2C 66 (OsPP2C66) (EC 3.1.3.16)	S	519	GVTRVNSLLNLPRILSGEKRSTSWRKRR___	14-3-3 domain binding motif;Calmodulin-dependent protein kinase II substrate motif;Calmodulin-dependent protein kinase IV substrate motif;Casein kinase II substrate motif;Chk1 kinase substrate motif;PKA kinase substrate motif;PKC kinase substrate motif	1	24.6989	24.4469	24.4832	25.1354	NaN	NaN	23.9457	NaN	NaN	24.522	23.852	24.1341
259	A0A0P0YBU9	Os12g0595401 protein	S	72	VHLPVVDLFRLGYLFSPRWLDIWRAEPLYLH	ERK1,2 kinase substrate motif;Growth associated histone HI kinase substrate motif;GSK-3, ERK1, ERK2, CDK5 substrate motif;PKA kinase substrate motif;PKC kinase substrate motif;WW domain binding motif	1	NaN	NaN	NaN	NaN	24.7317	24.6794	NaN	NaN	26.0298	24.9187	24.6447	25.6302
260	Q7XHW4	Probable calcium-binding protein CML24 (Calmodulin-like protein 24)	S	27	SVAAVRPSLGKAPSPSFRLRNGSLNAVRLRR	DNA dependent Protein kinase substrate motif;PKA kinase substrate motif;PKC kinase substrate motif	0.9999	NaN	NaN	NaN	NaN	24.7293	25.0712	NaN	NaN	24.1511	25.229	NaN	NaN
261	Q0DG76	Os05g0549100 protein	S	538	SVLRVQRKVVRTINESMDELSSQSKSIWWSR	b-Adrenergic Receptor kinase substrate motif;Casein kinase II substrate motif	0.999976	25.1007	25.8893	24.4917	NaN	NaN	25.6908	27.5282	25.5776	NaN	26.9614	26.1037	25.1923
262	Q7XLR1	Probable aquaporin PIP2-6 (OsPIP2;6) (Plasma membrane intrinsic protein 2-6)	S	2	______________MSKEVSEEPEHVRPKDY	Casein kinase II substrate motif;G protein-coupled receptor kinase 1 substrate motif;GSK3 kinase substrate motif	0.988649	26.3592	26.0334	25.8946	NaN	24.6233	NaN	NaN	NaN	25.0541	NaN	NaN	24.5271
263	P12331	Chlorophyll a-b binding protein 2, chloroplastic (LHCII type I CAB-2) (LHCP)	S	32	AAAKVFGEGRITMRKSAAKPKPAASGSPWYG	G protein-coupled receptor kinase 1 substrate motif;PKA kinase substrate motif;PKC kinase substrate motif	0.99999	26.4353	28.2078	27.3636	30.5146	29.9256	30.0185	28.6513	29.8202	NaN	29.8326	28.7957	29.7549
264	Q84ZK1	Eukaryotic translation initiation factor 5A (eIF-5A)	S	2	______________MSDSEEHHFESKADAGA	Casein kinase II substrate motif	1	22.8556	NaN	23.7913	27.9227	28.1518	NaN	NaN	NaN	25.7465	NaN	NaN	25.6774
265	Q84ZK1	Eukaryotic translation initiation factor 5A (eIF-5A)	S	4	____________MSDSEEHHFESKADAGASK	b-Adrenergic Receptor kinase substrate motif;Casein kinase II substrate motif;G protein-coupled receptor kinase 1 substrate motif	1	22.8556	NaN	23.7913	27.9227	28.1518	NaN	NaN	NaN	25.7465	NaN	NaN	25.6774
266	Q84L14	Nuclear cap-binding protein subunit 2 (20 kDa nuclear cap-binding protein) (NCBP 20 kDa subunit) (CBP20)	S	230	AIDSEKNPRFREKGDSDEEDDDYDKRRRR__	b-Adrenergic Receptor kinase substrate motif;BARD1 BRCT domain binding motif;Casein kinase II substrate motif;PKA kinase substrate motif;PKC kinase substrate motif	0.99972	22.7235	22.9267	23.0197	NaN	NaN	24.9193	NaN	24.3713	NaN	24.5422	23.7505	24.4975
267	Q5JJM4	Os01g0367300 protein	S	284	DSPPESSARLEKGTPSPDRMVSLPVGRSPRT	Cdc2 kinase substrate motif;CDK kinase substrate motif;CDK1,2,4,6 kinase substrate motif;DNA dependent Protein kinase substrate motif;ERK1,2 kinase substrate motif;GSK-3, ERK1, ERK2, CDK5 substrate motif;PKA kinase substrate motif;WW domain binding motif	1	18.6736	22.9766	NaN	NaN	22.1971	NaN	24.8769	24.6531	NaN	25.5152	24.4411	25.7337
268	Q84NP7	Probable AMP deaminase (EC 3.5.4.6)	S	94	GLPPLHTGREGKPIISPASTKRVGPLVRPTT	Casein kinase II substrate motif;ERK1,2 kinase substrate motif;G protein-coupled receptor kinase 1 substrate motif;GSK-3, ERK1, ERK2, CDK5 substrate motif;PKA kinase substrate motif;WW domain binding motif	0.965658	24.8852	24.3252	24.2477	24.9415	NaN	NaN	23.6722	25.7248	NaN	23.9219	24.4756	NaN
269	Q8GVE1	Chitin-inducible gibberellin-responsive protein 2	S	85	YTLDSSEGAGCMRHDSPSSQSFTTRSGSPLS	14-3-3 domain binding motif;b-Adrenergic Receptor kinase substrate motif;Calmodulin-dependent protein kinase II substrate motif;Casein kinase II substrate motif;ERK1,2 kinase substrate motif;GSK-3, ERK1, ERK2, CDK5 substrate motif;PKA kinase substrate motif;PKC kinase substrate motif;WW domain binding motif	0.998971	24.0839	23.7909	24.5452	NaN	22.687	NaN	NaN	NaN	26.0392	NaN	NaN	25.1878
270	Q5W645	Os05g0349500 protein	S	466	HKAKKASGTLKTPENSPKASDD_________	ERK1,2 kinase substrate motif;G protein-coupled receptor kinase 1 substrate motif;Growth associated histone HI kinase substrate motif;GSK3 kinase substrate motif;GSK-3, ERK1, ERK2, CDK5 substrate motif;PKA kinase substrate motif;PKC kinase substrate motif;WW domain binding motif	1	27.0916	26.3574	25.5525	NaN	25.9572	26.3078	26.5962	NaN	26.993	26.696	26.4355	27.6209
271	Q8LH03	DDRGK domain-containing protein 1	S	84	ADASTSRDRDVDDADSDLEEEIQDVPRGSKK	b-Adrenergic Receptor kinase substrate motif;Casein kinase I substrate motif;Casein kinase II substrate motif	1	25.0958	23.4153	24.5063	NaN	25.8591	25.7157	NaN	23.8453	NaN	NaN	NaN	24.2204
272	Q8W3D0	Probable pyridoxal 5'-phosphate synthase subunit PDX1.2 (PLP synthase subunit PDX1.2) (EC 4.3.3.6)	S	24	VALYGGANGLSHKSGSFSVKVGLAQMLRGGV	Casein kinase II substrate motif;PKA kinase substrate motif;PKC kinase substrate motif	0.998665	27.2147	26.3484	25.7188	27.6882	NaN	NaN	25.7331	NaN	26.2602	26.2654	24.8031	25.9776
273	Q9AS33	NPL4-like protein	S	103	RSSQPPPPKALSAAGSFGKKMTMDDLIARQI	MAPKAPK2 kinase substrate motif	0.999908	26.1441	25.7681	NaN	NaN	NaN	25.5917	NaN	25.6103	26.2515	25.498	25.3133	NaN
274	Q9AY76	Actin-depolymerizing factor 2 (ADF-2) (OsADF2)	S	8	________MAFMRSHSNASSGMGVAPDIRDT	14-3-3 domain binding motif;Calmodulin-dependent protein kinase II substrate motif;Calmodulin-dependent protein kinase IV substrate motif;Casein kinase II substrate motif;G protein-coupled receptor kinase 1 substrate motif;GSK3 kinase substrate motif;PKA kinase substrate motif;PKC kinase substrate motif	0.993913	26.8365	26.0664	26.017	27.5346	23.8361	NaN	26.8823	26.7304	26.7913	NaN	26.7136	26.6577
275	A0A0P0W8S4	Os04g0304200 protein (Fragment)	S	367	QLDGSDHVEPLRNRLSENTEIQSAKLVKATA	Casein kinase II substrate motif;G protein-coupled receptor kinase 1 substrate motif;PKA kinase substrate motif;PKC kinase substrate motif	0.980669	28.8332	26.0231	28.0077	29.1116	28.2977	27.8278	28.5658	22.6531	28.5179	29.2867	28.3314	28.1888
276	A0A0N7KFH5	Chloride channel protein (Fragment)	S	207	LNGKMFMKDQLKTSGSFVLQRFGAFDFAKPG	PKA kinase substrate motif	0.994561	NaN	24.9841	24.9327	25.6312	24.689	NaN	24.0447	NaN	NaN	23.6919	24.1465	23.7753
277	A0A0N7KFQ9	Os02g0631500 protein	S	72	SERAASVEKPENEKLSDSESQKVQPHDTAFS	Casein kinase I substrate motif;Casein kinase II substrate motif;G protein-coupled receptor kinase 1 substrate motif;GSK3 kinase substrate motif;PKA kinase substrate motif;PKC kinase substrate motif	0.954892	NaN	NaN	NaN	27.7895	NaN	28.4707	28.2949	NaN	27.7679	NaN	NaN	NaN
278	Q84R70	Expressed protein (Os03g0672400 protein)	S	656	EAPADQAEPVVEKTLSGSGSSEGHLRVKGSQ	Calmodulin-dependent protein kinase II substrate motif;Casein kinase II substrate motif;Chk1 kinase substrate motif;G protein-coupled receptor kinase 1 substrate motif;GSK3 kinase substrate motif;PKA kinase substrate motif;PKC kinase substrate motif	0.947652	25.5984	24.8755	23.7778	NaN	24.1532	NaN	NaN	NaN	25.6755	24.325	24.291	25.6641
279	P0C422	Photosystem II reaction center protein H (PSII-H) (Photosystem II 10 kDa phosphoprotein)	T	3	_____________MATQTVEDSSRPGPRQTR		1	24.4269	23.3333	25.173	26.7085	26.0087	NaN	25.9516	27.3669	27.4261	27.0781	26.9922	26.1994
280	P0C422	Photosystem II reaction center protein H (PSII-H) (Photosystem II 10 kDa phosphoprotein)	T	5	___________MATQTVEDSSRPGPRQTRVG	Casein kinase II substrate motif;G protein-coupled receptor kinase 1 substrate motif	0.999762	24.4269	23.3333	25.173	26.7085	26.0087	NaN	25.9516	27.3669	27.4261	27.0781	26.9922	26.1994
281	A0A0N7KG12	Os02g0729400 protein (Fragment)	S	312	PSRVIPAAADRLVTASSSASRTTTSRKLLPG	Casein kinase II substrate motif;G protein-coupled receptor kinase 1 substrate motif;GSK3 kinase substrate motif	0.811613	NaN	NaN	NaN	NaN	NaN	NaN	NaN	30.8863	30.7495	NaN	NaN	NaN
282	A0A0P0W8S4	Os04g0304200 protein (Fragment)	T	128	KQPRGARAPADAALLTPPKMSDADKMAAMSP	Cdc2 kinase substrate motif;CDK1,2,4,6 kinase substrate motif;CDK5 kinase substrate motif;GSK-3, ERK1, ERK2, CDK5 substrate motif;RAF1 kinase substrate motif;WW domain binding motif	1	25.0928	25.2486	26.0093	NaN	NaN	26.0764	25.1799	NaN	26.6453	25.8039	25.0338	26.4436
283	A0A0N7KG12	Os02g0729400 protein (Fragment)	T	310	VTPSRVIPAAADRLVTASSSASRTTTSRKLL	Calmodulin-dependent protein kinase II substrate motif;Casein kinase II substrate motif;G protein-coupled receptor kinase 1 substrate motif;PKC kinase substrate motif	0.99989	27.0007	30.3398	27.9197	30.1288	31.8134	NaN	27.52	NaN	NaN	32.1247	29.1228	NaN
284	A0A0P0UYI5	Os01g0147200 protein	T	49	LEDDLGDDWNRGRSPTPVHGDDGAGSSSKPR	Akt kinase substrate motif;Calmodulin-dependent protein kinase II substrate motif;DNA dependent Protein kinase substrate motif;GSK-3, ERK1, ERK2, CDK5 substrate motif;PKC kinase substrate motif;WW domain binding motif	0.999974	NaN	22.6832	23.4783	NaN	NaN	24.8778	NaN	26.7949	NaN	23.7541	24.9545	26.9627
285	A0A0N7KH04	Os03g0270200 protein	S	253	LSSDSEHRKLTKSLNSPNKPERNSTRDSSLK	Cdc2 kinase substrate motif;CDK kinase substrate motif;CDK1,2,4,6 kinase substrate motif;ERK1,2 kinase substrate motif;G protein-coupled receptor kinase 1 substrate motif;GSK-3, ERK1, ERK2, CDK5 substrate motif;PKA kinase substrate motif;WW domain binding motif	0.9998	25.3321	25.8643	25.8765	26.8212	NaN	24.9427	26.612	26.4769	NaN	25.6553	25.1062	25.3368
286	A0A0N7KI38	Os03g0764450 protein (Fragment)	S	363	KHIWPLNSDGPVTSASPERSTPKEKPQKRER	Casein kinase II substrate motif;Cdc2 kinase substrate motif;CDK kinase substrate motif;CDK1,2,4,6 kinase substrate motif;ERK1,2 kinase substrate motif;G protein-coupled receptor kinase 1 substrate motif;GSK3 kinase substrate motif;GSK-3, ERK1, ERK2, CDK5 substrate motif;WW domain binding motif	0.967077	NaN	NaN	24.5267	24.9192	25.2467	24.3611	NaN	24.5388	23.9431	23.207	23.6311	23.6412
287	Q0DG76	Os05g0549100 protein	T	534	NLLASVLRVQRKVVRTINESMDELSSQSKSI	Casein kinase II substrate motif;G protein-coupled receptor kinase 1 substrate motif;PKA kinase substrate motif	1	25.1007	25.8893	24.4917	NaN	NaN	25.6908	27.5282	25.5776	NaN	26.9614	26.1037	25.1923
288	Q5JJM4	Os01g0367300 protein	T	282	QWDSPPESSARLEKGTPSPDRMVSLPVGRSP	Casein kinase I substrate motif;GSK-3, ERK1, ERK2, CDK5 substrate motif;PKA kinase substrate motif;PKC kinase substrate motif;WW domain binding motif	1	18.6736	22.9766	NaN	NaN	22.1971	NaN	24.8769	24.6531	NaN	25.5152	24.4411	25.7337
289	Q5W645	Os05g0349500 protein	T	462	AVEMHKAKKASGTLKTPENSPKASDD_____	G protein-coupled receptor kinase 1 substrate motif;Growth associated histone HI kinase substrate motif;GSK-3, ERK1, ERK2, CDK5 substrate motif;WW domain binding motif	0.999924	27.0916	26.3574	25.5525	NaN	25.9572	26.3078	25.7679	NaN	26.993	26.696	26.4355	27.6209
290	Q5ZBN0	Os01g0607900 protein (cDNA, clone: J100082A19, full insert sequence)	T	683	TSEEERSRGTPPAAPTP______________	DNA dependent Protein kinase substrate motif;GSK-3, ERK1, ERK2, CDK5 substrate motif;WW domain binding motif	1	25.0442	24.8191	23.622	25.2045	24.3694	25.0922	24.4059	NaN	NaN	24.7075	23.3793	24.2966
291	Q5VMT5	Os06g0286351 protein (cDNA clone:J023074F05, full insert sequence)	S	1306	GKKGAKKPHAEILSSSPKKSDEAGSSKRTVD	Cdc2 kinase substrate motif;CDK kinase substrate motif;CDK1,2,4,6 kinase substrate motif;ERK1,2 kinase substrate motif;G protein-coupled receptor kinase 1 substrate motif;Growth associated histone HI kinase substrate motif;GSK3 kinase substrate motif;GSK-3, ERK1, ERK2, CDK5 substrate motif;MDC1 BRCT domain binding motif;PKA kinase substrate motif;PKC kinase substrate motif;Plk1 PBD domain binding…	0.769635	23.8087	23.8569	24.5028	NaN	NaN	NaN	NaN	25.4721	NaN	24.0486	NaN	NaN
292	A0A0P0YBU9	Os12g0595401 protein	Y	69	RVLVHLPVVDLFRLGYLFSPRWLDIWRAEPL		1	NaN	NaN	NaN	NaN	24.7317	24.6794	NaN	NaN	26.0298	24.9187	24.6447	25.6302
293	P41095	60S acidic ribosomal protein P0 (Os60SP0p)	S	309	SAAKEEEKKEEPEEESDGDLGMSLFD_____	b-Adrenergic Receptor kinase substrate motif;Casein kinase I substrate motif;Casein kinase II substrate motif;Pyruvate dehydrogenase kinase substrate motif	0.9985	27.2581	27.3241	NaN	27.1142	27.2379	27.3898	27.2753	NaN	NaN	27.8317	26.1066	26.9861
294	A0A0N7KNC0	Os07g0421866 protein	S	162	SKAGSAAATGGRRTGSPPPSPAPVAKDAATK	14-3-3 domain binding motif;Calmodulin-dependent protein kinase II substrate motif;ERK1,2 kinase substrate motif;G protein-coupled receptor kinase 1 substrate motif;GSK3 kinase substrate motif;GSK-3, ERK1, ERK2, CDK5 substrate motif;PKA kinase substrate motif;PKC kinase substrate motif;WW domain binding motif;ZIP kinase substrate motif	0.970951	28.2057	27.5356	27.5611	28.4738	22.5791	27.6639	28.3603	28.1756	27.3188	27.4537	27.8678	27.5111
295	A0A0P0UYI5	Os01g0147200 protein	S	47	DDLEDDLGDDWNRGRSPTPVHGDDGAGSSSK	14-3-3 domain binding motif;Calmodulin-dependent protein kinase II substrate motif;Casein kinase II substrate motif;ERK1,2 kinase substrate motif;Growth associated histone HI kinase substrate motif;GSK-3, ERK1, ERK2, CDK5 substrate motif;PKA kinase substrate motif;PKC kinase substrate motif;WW domain binding motif	0.999986	NaN	NaN	NaN	NaN	NaN	NaN	22.6371	26.2052	NaN	NaN	NaN	25.6553
296	A0A0P0V7L5	Os01g0723800 protein (Fragment)	S	16	KGGPYSRLVKLQKMVSYIDQEGGDQFRASSV	Calmodulin-dependent protein kinase II substrate motif;Casein kinase II substrate motif;Chk1 kinase substrate motif;PKA kinase substrate motif;PKC kinase substrate motif;Pyruvate dehydrogenase kinase substrate motif	0.919737	NaN	22.6914	23.3991	23.9946	24.2052	24.1497	NaN	23.7801	NaN	22.4373	NaN	NaN
297	A0A0P0V8R9	Diacylglycerol O-acyltransferase (EC 2.3.1.20)	S	48	GGGKGAAAATPPEPVSPSARLLEDFFIVVVI	Casein kinase I substrate motif;Casein kinase II substrate motif;ERK1,2 kinase substrate motif;GSK-3, ERK1, ERK2, CDK5 substrate motif;WW domain binding motif	0.918137	26.4807	26.8562	25.3924	27.4171	26.3086	27.3538	NaN	26.5943	26.5108	26.6746	25.7984	26.6783
298	A0A0P0VAZ1	Os01g0873900 protein	S	251	SPVRSPTQRGHTITLSPNKASSNSSPLLTQE	Cdc2 kinase substrate motif;CDK kinase substrate motif;CDK1,2,4,6 kinase substrate motif;ERK1,2 kinase substrate motif;G protein-coupled receptor kinase 1 substrate motif;GSK-3, ERK1, ERK2, CDK5 substrate motif;WW domain binding motif	0.977698	NaN	NaN	NaN	25.1233	NaN	NaN	24.4945	NaN	24.9541	NaN	NaN	25.328
299	A0A0P0VBK4	Os01g0897800 protein (Fragment)	S	320	MEETVPSRVHESPVLSPQRKASPSSNDETAK	Cdc2 kinase substrate motif;CDK kinase substrate motif;CDK1,2,4,6 kinase substrate motif;ERK1,2 kinase substrate motif;GSK-3, ERK1, ERK2, CDK5 substrate motif;MAPKAPK2 kinase substrate motif;WW domain binding motif	0.997764	25.8152	24.88	25.1189	26.5134	25.263	25.1287	23.8262	25.7185	24.9877	24.4033	24.778	25.2298
300	A0A0P0VCJ7	Os01g0936800 protein (Fragment)	S	75	PVKEAPILREVPVHISPVRETSFLREVPAPV	Cdc2 kinase substrate motif;CDK kinase substrate motif;CDK1,2,4,6 kinase substrate motif;ERK1,2 kinase substrate motif;GSK-3, ERK1, ERK2, CDK5 substrate motif;WW domain binding motif	1	22.8456	26.4991	NaN	NaN	NaN	23.9933	26.2954	NaN	NaN	NaN	NaN	NaN
301	P48599	Eukaryotic translation initiation factor 4E-1 (eIF-4E-1) (eIF4E-1) (eIF-4F 25 kDa subunit) (eIF-4F p26 subunit) (mRNA cap-binding protein)	S	11	_____MAEEHETRPPSAGRPPSSGRGRADDA	14-3-3 domain binding motif;Calmodulin-dependent protein kinase II substrate motif;CLK1 kinase substrate motif;DNA dependent Protein kinase substrate motif;G protein-coupled receptor kinase 1 substrate motif;PKA kinase substrate motif;PKC kinase substrate motif	0.990463	27.9231	26.1648	NaN	NaN	NaN	27.519	NaN	27.1908	28.133	26.5934	26.8597	NaN
302	A0A0P0VFR4	Calcium-transporting ATPase (EC 7.2.2.10)	S	11	_____MPVGVQAPEASPGRYHRRRDDDDGNG	Cdc2 kinase substrate motif;CDK kinase substrate motif;CDK1,2,4,6 kinase substrate motif;ERK1,2 kinase substrate motif;GSK-3, ERK1, ERK2, CDK5 substrate motif;WW domain binding motif	1	24.1551	24.2597	24.2617	24.5475	24.3003	25.1982	24.433	25.2749	25.3686	24.1238	24.2161	NaN
303	A0A0P0VG16	Os02g0198600 protein (Fragment)	S	34	IPSHIRDEEKLSKLASLSQGAAGESSTAREK	Calmodulin-dependent protein kinase II substrate motif;Casein kinase II substrate motif;Chk1 kinase substrate motif;MAPKAPK2 kinase substrate motif;Phosphorylase kinase substrate motif;PKA kinase substrate motif;PKC kinase substrate motif	0.999516	23.908	24.5915	NaN	25.3412	NaN	24.9605	NaN	NaN	23.6659	24.0926	23.7964	24.9367
304	Q6H8D7	Os02g0208900 protein	S	247	PDNGSPNYQKETDGSSPVVRPVRDILGDNAP	Casein kinase I substrate motif;ERK1,2 kinase substrate motif;GSK-3, ERK1, ERK2, CDK5 substrate motif;MDC1 BRCT domain binding motif;Plk1 PBD domain binding motif;WW domain binding motif	0.877529	26.019	25.7809	25.4046	26.2031	24.9081	25.8566	25.0545	NaN	NaN	24.215	NaN	24.4759
305	A0A0P0VGR3	Os02g0229400 protein (Fragment)	S	387	GGFKRIYLHQEEVPGSRRGSVISLPGGGDAP	G protein-coupled receptor kinase 1 substrate motif;GSK3 kinase substrate motif;PKA kinase substrate motif;PKC kinase substrate motif	1	23.7826	25.8368	24.5701	25.7531	NaN	NaN	NaN	25.8503	23.9478	25.9486	25.7726	25.2944
306	A0A0P0VKR4	Os02g0580900 protein (Fragment)	S	31	RCLDRAAIMEADLAASPAKTNQTSAAPAATV	Cdc2 kinase substrate motif;CDK kinase substrate motif;CDK1,2,4,6 kinase substrate motif;ERK1,2 kinase substrate motif;G protein-coupled receptor kinase 1 substrate motif;GSK-3, ERK1, ERK2, CDK5 substrate motif;WW domain binding motif	1	24.2953	25.5404	25.0235	26.6631	NaN	NaN	21.2891	NaN	NaN	NaN	NaN	NaN
307	A0A0P0VM23	Os02g0615800 protein (Fragment)	S	284	LLEKMKPREKYISSQSFGENFLKVSYNDLAQ	Casein kinase II substrate motif	0.993902	25.8799	25.8646	25.4503	26.6229	26.4062	NaN	26.3023	26.0668	26.2475	25.5358	26.9748	25.9829
308	A0A0P0VNU0	Nuclear matrix constituent protein 1a (OsNMCP1a)	S	118	QNRKGRAKGGVKRTRSVLAVVEDAKEILGEN	14-3-3 domain binding motif;AMP-activated protein kinase substrate motif;Calmodulin-dependent protein kinase I substrate motif;Calmodulin-dependent protein kinase II alpha substrate motif;Calmodulin-dependent protein kinase II substrate motif;Calmodulin-dependent protein kinase IV substrate motif;Chk1 kinase substrate motif;Phosphorylase kinase substrate motif;PKA kinase substrate motif;PKC kinas…	1	25.5471	25.5122	24.9787	26.3045	25.2919	25.6928	25.5636	24.9745	25.7788	25.9279	26.0631	26.315
309	A0A0P0VR12	Os02g0805900 protein (Fragment)	S	38	TGAAPVENPVITRTGSDPQTLDSRPGKSFRN	14-3-3 domain binding motif;Calmodulin-dependent protein kinase II substrate motif;Calmodulin-dependent protein kinase IV substrate motif;Chk1 kinase substrate motif;G protein-coupled receptor kinase 1 substrate motif;PKA kinase substrate motif;PKC kinase substrate motif	0.927975	26.6956	26.1731	26.7513	26.9251	26.4686	NaN	26.7167	NaN	27.9342	26.448	25.561	26.5652
