# Supplementary material for: The phosphoproteome of rice leaves responds to water and nitrogen supply
Source: Royal Society of Chemistry journal article supplement (doi:10.1039/d1mo00137j), 2021-07-16
Supplement: d1mo00137j2.xlsx [file d1mo00137j2.xlsx]

## Sheet: Legends
Column header	Explanation
Row Number
UniProt ID	Single UniProt (http://www.uniprot.org) identifier of the protein to which the peptide maps
Protein Name	Name of protein to which the peptide maps
Phosphorylated amino acid	Phosphorylated amino acid residue (S, T, Y)
Position	The position where amino acid residue is phosphorylated
Sequence window	Sequence window of ±15 amino acids with S,T,Y in the center
Motifs	Binding motifs, where phosphorylation has occurred
Localization probability	Probabilities of site/peptide spectrum match where phosphorylation has been identified
Log2-LFQ intensity	Log-transformed label-free quantification intensity
The two proteins significantly changed in phosphorylation in all four comparisons, myosin-17 and plasma membrane H+-ATPase, are highlighted in green.

## Sheet: WD N750 vs. WW N750
			Phosphosites significantly changed in phosphorylation in WD/N750 vs WW/N750
Row	UniProt ID	Protein name	Phosphorylated amino acid	Position	Sequence window	Motifs	Localization probability	Log2 LFQ Intensity_WW/N750-1	Log2 LFQ Intensity_WW/N750-2	Log2 LFQ Intensity_WW/N750-3	Log2 LFQ Intensity_WW/N250-1	Log2 LFQ Intensity_WW/N250-2	Log2 LFQ Intensity_WW/N250-3	Log2 LFQ Intensity_WD/N750-1	Log2 LFQ Intensity_WD/N750-2	Log2 LFQ Intensity_WD/N750-3	Log2 LFQ Intensity_WD/N250-1	Log2 LFQ Intensity_WD/N250-2	Log2 LFQ Intensity_WD/N250-3	P-value	Fold change
1	P0C422	Photosystem II reaction center protein H (PSII-H) (Photosystem II 10 kDa phosphoprotein)	T	5	___________MATQTVEDSSRPGPRQTRVG	Casein kinase II substrate motif;G protein-coupled receptor kinase 1 substrate motif	0.999762	24.4269	23.3333	25.173	26.7085	26.0087	24.3637	25.9516	27.3669	27.4261	27.0781	26.9922	26.1994	0.0223756	2.60378
2	Q7Y163	Hepatocellular carcinoma-associated antigen 59 family protein, expressed (Os03g0374100 protein) (cDNA clone:001-042-H03, full insert sequence) (cDNA clone:J033011M11, full insert sequence)	S	19	NFRKRNLEADAAADHSDDDDARRVALEEIKY	Casein kinase II substrate motif;Pyruvate dehydrogenase kinase substrate motif	1	22.648	24.3766	23.1612	26.5983	23.2615	23.1408	24.7019	26.2975	26.3061	22.6861	23.324	26.5881	0.0326363	2.37322
3	Q94E74	Os01g0511100 protein (cDNA clone:J023069J05, full insert sequence)	S	3	_____________MASPSAPGPKLQKAMVAV	Casein kinase II substrate motif;ERK1,2 kinase substrate motif;G protein-coupled receptor kinase 1 substrate motif;GSK-3, ERK1, ERK2, CDK5 substrate motif;WW domain binding motif	0.99539	23.1263	23.8852	23.7037	24.7356	24.3635	23.8282	25.3178	25.6595	25.29	23.8426	24.1811	23.6994	0.00199369	1.8507
4	A0A0P0XLN5	Os09g0279000 protein (Fragment)- protein EMSY-LIKE 3 [Oryza sativa Japonica Group]	S	477	LIDAIARLAEASDGESDEHNRVRRNAPYAGS	b-Adrenergic Receptor kinase substrate motif;Casein kinase I substrate motif;Casein kinase II substrate motif;MAPKAPK2 kinase substrate motif	0.911699	22.9827	23.2013	23.4992	23.9861	23.348	23.5966	24.6628	25.3047	24.0378	23.3184	23.013	23.7021	0.021857	1.44071
5	A0A0P0VAZ1	Os01g0873900 protein	S	251	SPVRSPTQRGHTITLSPNKASSNSSPLLTQE	Cdc2 kinase substrate motif;CDK kinase substrate motif;CDK1,2,4,6 kinase substrate motif;ERK1,2 kinase substrate motif;G protein-coupled receptor kinase 1 substrate motif;GSK-3, ERK1, ERK2, CDK5 substrate motif;WW domain binding motif	0.977698	23.5185	23.2295	23.5205	25.1233	23.3849	23.8704	24.4945	24.6519	24.9541	22.8084	23.593	25.328	0.00153182	1.27733
6	Q7XQH8	Os04g0497600 protein (cDNA clone:001-027-D05, full insert sequence) (cDNA clone:J013149O10, full insert sequence)-la protein 1 [Oryza sativa Japonica Group]	S	299	EKSKEAAAQSVKKGESPSENADDPISREDFK	b-Adrenergic Receptor kinase substrate motif;Calmodulin-dependent protein kinase II substrate motif;Casein kinase II substrate motif;Chk1 kinase substrate motif;ERK1,2 kinase substrate motif;GSK-3, ERK1, ERK2, CDK5 substrate motif;PKA kinase substrate motif;PKC kinase substrate motif;WW domain binding motif	0.990369	23.6499	23.5647	23.624	25.3248	24.3901	25.0009	24.2309	24.7493	25.5394	22.902	23.3101	25.7515	0.0323362	1.22702
7	Q84L14	Nuclear cap-binding protein subunit 2 (20 kDa nuclear cap-binding protein) (NCBP 20 kDa subunit) (CBP20)	S	230	AIDSEKNPRFREKGDSDEEDDDYDKRRRR__	b-Adrenergic Receptor kinase substrate motif;BARD1 BRCT domain binding motif;Casein kinase II substrate motif;PKA kinase substrate motif;PKC kinase substrate motif	0.99972	22.7235	22.9267	23.0197	24.6871	23.8045	24.9193	23.768	24.3713	23.561	24.5422	23.7505	24.4975	0.017389	1.01015
8	Q6YXI1	Glucose-6-phosphate isomerase (EC 5.3.1.9)	S	605	MAANDRALIAEGSCGSPRSIKVYLGECNVDE	Casein kinase II substrate motif;ERK1,2 kinase substrate motif;Growth associated histone HI kinase substrate motif;GSK-3, ERK1, ERK2, CDK5 substrate motif;PKA kinase substrate motif;PKC kinase substrate motif;WW domain binding motif	0.791614	24.1896	23.6233	23.4745	24.0322	23.6691	25.1774	24.428	24.5051	24.6827	23.5706	23.9547	23.7442	0.0281284	0.776168
9	A0A0P0VM23	Os02g0615800 protein (Fragment)-receptor kinase-like protein Xa21 [Oryza sativa Japonica Group]	S	284	LLEKMKPREKYISSQSFGENFLKVSYNDLAQ	Casein kinase II substrate motif	0.993902	25.8799	25.8646	25.4503	26.6229	26.4062	23.7799	26.3023	26.0668	26.2475	25.5358	26.9748	25.9829	0.0397341	0.473949
10	A0A0P0V7R2	Os01g0730300 protein (Fragment)	T	50	AGGRPPRARRMQRTMTTPGTLAELDEERAGS	Calmodulin-dependent protein kinase II substrate motif;Calmodulin-dependent protein kinase IV substrate motif;Chk1 kinase substrate motif;G protein-coupled receptor kinase 1 substrate motif;PKC kinase substrate motif	0.851859	24.1553	24.1595	24.6967	24.8766	23.4394	24.6326	23.7411	23.4869	23.6647	22.8076	23.3517	24.4184	0.0222864	-0.706284
11	Q6ZKL8	Probable protein phosphatase 2C 66 (OsPP2C66) (EC 3.1.3.16)	S	519	GVTRVNSLLNLPRILSGEKRSTSWRKRR___	14-3-3 domain binding motif;Calmodulin-dependent protein kinase II substrate motif;Calmodulin-dependent protein kinase IV substrate motif;Casein kinase II substrate motif;Chk1 kinase substrate motif;PKA kinase substrate motif;PKC kinase substrate motif	1	24.6989	24.4469	24.4832	25.1354	23.5671	23.5919	23.9457	23.518	23.8927	24.522	23.852	24.1341	0.00828631	-0.75747
12	A0A0P0W9D5	Os04g0382300 protein (Fragment)	S	55	SAVGSPVANLVSRLGSFTFRRTSSGRVETTT	14-3-3 domain binding motif;Calmodulin-dependent protein kinase II alpha substrate motif;Calmodulin-dependent protein kinase II substrate motif;Calmodulin-dependent protein kinase IV substrate motif;Casein kinase II substrate motif;Chk1 kinase substrate motif;MAPKAPK2 kinase substrate motif;PKA kinase substrate motif;PKC kinase substrate motif	0.998966	23.9561	23.9098	24.0323	24.4977	24.0245	23.4553	23.2843	23.1015	23.2252	22.9082	23.1967	23.2509	0.000295535	-0.762386
13	Q7XPY2	Plasma membrane ATPase (EC 7.1.2.1) (Proton pump)	T	881	YGREEREAQWATAQRTLHGLQPPEVASNTLF		1	27.9432	27.237	27.4385	28.0288	27.5012	28.1041	26.4195	26.2337	26.6966	26.4713	26.085	26.2729	0.0119778	-1.08966
14	Q6ZD98	Os08g0156700 protein (cDNA clone:J023062F08, full insert sequence)-vesicle-associated protein 1-2 [Oryza sativa Japonica Group]	S	3	_____________MASPGPATAGELLRIDPV	ERK1,2 kinase substrate motif;G protein-coupled receptor kinase 1 substrate motif;GSK-3, ERK1, ERK2, CDK5 substrate motif;WW domain binding motif	0.999988	24.7525	23.625	24.8552	24.4571	24.1415	24.2023	23.4884	23.1395	23.0025	24.0115	20.1387	24.509	0.0459036	-1.20078
15	A0A0P0W1J8	Os03g0686300 protein myosin-17 [Oryza sativa Japonica]	S	1077	MESENKVLRQQAVAISPTAKSLAAYPKSPFQ	Casein kinase II substrate motif;ERK1,2 kinase substrate motif;GSK-3, ERK1, ERK2, CDK5 substrate motif;WW domain binding motif	0.827868	24.7063	24.9242	24.203	24.5623	25.5837	24.9073	23.8439	23.2454	22.9587	22.0383	23.1978	23.2208	0.0200522	-1.26184
16	A0A0P0Y502	Sodium/hydrogen exchanger (Fragment)	S	452	ARHLNRESSALSDPPSPKSFLDPLILNGSDV	Casein kinase I substrate motif;Casein kinase II substrate motif;DNA dependent Protein kinase substrate motif;ERK1,2 kinase substrate motif;Growth associated histone HI kinase substrate motif;GSK-3, ERK1, ERK2, CDK5 substrate motif;MAPKAPK2 kinase substrate motif;PKA kinase substrate motif;PKC kinase substrate motif;WW domain binding motif	0.999963	24.943	25.3583	24.5073	24.8161	22.0853	25.5593	23.5633	23.2442	24.1977	24.235	24.2169	24.6794	0.0272248	-1.26781
17	Q6EU15	Os02g0672100 protein	S	85	KKRTLPDPDAEVIALSPKTLLATNRFVCEVC	Casein kinase II substrate motif;ERK1,2 kinase substrate motif;Growth associated histone HI kinase substrate motif;GSK-3, ERK1, ERK2, CDK5 substrate motif;PKA kinase substrate motif;PKC kinase substrate motif;WW domain binding motif	1	25.3913	24.4535	24.7663	25.6332	23.5007	23.6574	23.4108	23.3801	23.7275	23.0018	22.6555	23.9798	0.0101073	-1.36421
18	Q7G649	Expressed protein (Os10g0330000 protein) (cDNA clone:001-020-G07, full insert sequence) (cDNA clone:J023043A18, full insert sequence) (cDNA clone:J023092O07, full insert sequence)-nodulin-related protein 1 [Oryza sativa Japonica Group]	S	9	_______MAEENKSGSGDLMASGKVVAEATM	PKA kinase substrate motif;PKC kinase substrate motif	0.972821	25.7278	25.1053	25.8307	24.7274	24.2899	25.848	23.6472	24.9675	23.877	23.8085	25.2461	26.6717	0.0405752	-1.39069
19	Q6H8D7	Os02g0208900 protein	S	247	PDNGSPNYQKETDGSSPVVRPVRDILGDNAP	Casein kinase I substrate motif;ERK1,2 kinase substrate motif;GSK-3, ERK1, ERK2, CDK5 substrate motif;MDC1 BRCT domain binding motif;Plk1 PBD domain binding motif;WW domain binding motif	0.877529	26.019	25.7809	25.4046	26.2031	24.9081	25.8566	25.0545	23.9895	23.6463	24.215	22.9501	24.4759	0.0307806	-1.50477
20	Q7XXR0	Os03g0744600 protein (Stem-specific protein TSJT1, putative, expressed) (cDNA clone:J013037C05, full insert sequence)	S	243	VDSEAKKDSGIPRVGSAADWSNHF_______	14-3-3 domain binding motif;Calmodulin-dependent protein kinase II substrate motif;Calmodulin-dependent protein kinase IV substrate motif;Casein kinase II substrate motif;Chk1 kinase substrate motif;PKA kinase substrate motif;PKC kinase substrate motif;Pyruvate dehydrogenase kinase substrate motif	1	27.3929	27.089	27.976	25.9566	25.8984	27.0563	26.1809	25.2378	26.0564	27.0251	26.7765	26.9902	0.013524	-1.66094
21	Q0JLN9	Os01g0585300 protein (cDNA clone:J023103B06, full insert sequence)	T	81	EVDVFKKLERRKVLSTVEKAGLLSRAEELGV	G protein-coupled receptor kinase 1 substrate motif;MDC1 BRCT domain binding motif;PKA kinase substrate motif;Plk1 PBD domain binding motif	0.820598	26.2359	25.1516	25.8454	26.3113	23.437	24.7612	23.6581	24.2474	24.3212	24.9155	23.2789	25.387	0.0117919	-1.66874
22	Q0D4F7	Os07g0628700 protein-cysteine-rich receptor-like protein kinase 6 [Oryza sativa Japonica Group]	S	583	MKTITEMVDPYLRSDSSSLDEILRCIHVGLV	14-3-3 domain binding motif;b-Adrenergic Receptor kinase substrate motif;Calmodulin-dependent protein kinase II substrate motif;Calmodulin-dependent protein kinase IV substrate motif;Casein kinase II substrate motif;PKA kinase substrate motif;PKC kinase substrate motif	0.982301	25.5341	25.1845	25.3642	25.896	25.82	25.3924	24.1206	24.3564	22.5916	23.7103	25.2285	25.3241	0.0410519	-1.67138
23	Q0DI98	Os05g0406000 protein (Fragment)	S	65	RVTPPDSPPRSFASISPPRRHSISITSRNLF	Cdc2 kinase substrate motif;CDK kinase substrate motif;CDK1,2,4,6 kinase substrate motif;ERK1,2 kinase substrate motif;GSK-3, ERK1, ERK2, CDK5 substrate motif;WW domain binding motif	0.99715	27.1343	26.723	27.8785	27.3296	25.4244	26.5967	25.741	25.7717	24.3508	25.834	25.5833	26.3255	0.0275992	-1.95743
24	Q7XLR1	Probable aquaporin PIP2-6 (OsPIP2;6) (Plasma membrane intrinsic protein 2-6)	S	2	______________MSKEVSEEPEHVRPKDY	Casein kinase II substrate motif;G protein-coupled receptor kinase 1 substrate motif;GSK3 kinase substrate motif	0.988649	26.3592	26.0334	25.8946	23.9524	24.6233	23.303	23.4741	23.5382	25.0541	23.2311	23.8947	24.5271	0.0178319	-2.07358
25	Q10KI0	Os03g0383800 protein (SAP domain containing protein, expressed)	S	380	GSPEKLNLDRSSGDESMEEDVMEIKQVESNI	b-Adrenergic Receptor kinase substrate motif;Casein kinase II substrate motif;MAPKAPK2 kinase substrate motif;Plk1 kinase substrate motif	0.952935	24.6272	24.0423	25.3625	23.9743	23.9965	24.9982	21.5735	23.396	22.8399	23.3948	24.5745	25.2481	0.034886	-2.07419
26	A0A0P0Y290	Os11g0481400 protein	S	124	RKGGGCGDGRRDGGGSEGARQRWAVAAAA__	G protein-coupled receptor kinase 1 substrate motif	1	27.9932	27.2404	28.0631	25.3134	23.0028	23.0717	26.1274	24.1249	24.1293	27.3823	22.7677	27.1909	0.014316	-2.97169
27	B7FAA5	Os04g0480100 protein (cDNA, clone: J100060F14, full insert sequence)	S	463	TIELDDKVRFGQRPGSGAGRVSAVPPAIAEE	14-3-3 domain binding motif;Calmodulin-dependent protein kinase II substrate motif;PKA kinase substrate motif;PKC kinase substrate motif	1	28.4354	27.4402	28.221	28.4241	23.8509	23.5182	25.8366	23.8286	23.5303	27.8008	26.4956	28.2088	0.00980598	-3.63368

## Sheet: WD N250 vs. WW N250
			Phosphosites significantly changed in phosphorylation in WD/N250 vs. WW/N250
Row	UniProt ID	Protein name	Phosphorylated amino acid	Position	Sequence window	Motifs	Localization probability	Log2 LFQ Intensity_WW/N750-1	Log2 LFQ Intensity_WW/N750-2	Log2 LFQ Intensity_WW/N750-3	Log2 LFQ Intensity_WW/N250-1	Log2 LFQ Intensity_WW/N250-2	Log2 LFQ Intensity_WW/N250-3	Log2 LFQ Intensity_WD/N750-1	Log2 LFQ Intensity_WD/N750-2	Log2 LFQ Intensity_WD/N750-3	Log2 LFQ Intensity_WD/N250-1	Log2 LFQ Intensity_WD/N250-2	Log2 LFQ Intensity_WD/N250-3	P-value	Fold change
1	Q0E0T0	Os02g0525600 protein	S	41	TGAAASSPRTMRRSFSNASSGSHGGGGGAKC	14-3-3 domain binding motif;Calmodulin-dependent protein kinase II substrate motif;Calmodulin-dependent protein kinase IV substrate motif;Casein kinase II substrate motif;Chk1 kinase substrate motif;G protein-coupled receptor kinase 1 substrate motif;GSK3 kinase substrate motif;PKA kinase substrate motif;PKC kinase substrate motif;ZIP kinase substrate motif	0.978069	22.7966	26.5753	23.2499	24.4167	23.2471	23.8917	26.1735	25.2453	24.4974	26.1581	26.5832	26.8787	0.00249712	2.68814
2	A0A0P0WJI6	Os05g0232200 protein (Fragment)	S	183	FSAIIVDPQMKDTKESPEQSGSNSAVQKMIS	b-Adrenergic Receptor kinase substrate motif;Casein kinase II substrate motif;ERK1,2 kinase substrate motif;G protein-coupled receptor kinase 1 substrate motif;GSK3 kinase substrate motif;GSK-3, ERK1, ERK2, CDK5 substrate motif;PKA kinase substrate motif;PKC kinase substrate motif;WW domain binding motif	0.909809	26.125	25.1731	25.3642	24.4959	23.6076	23.8719	23.3508	25.5018	23.6468	25.2351	24.8346	24.9978	0.0231598	1.03066
3	A0A0P0WAI0	Os04g0440000 protein (Fragment)	S	147	QDAKTSKVGAEVSDRSPKHKRDSGEGAETAN	ERK1,2 kinase substrate motif;Growth associated histone HI kinase substrate motif;GSK-3, ERK1, ERK2, CDK5 substrate motif;PKA kinase substrate motif;PKC kinase substrate motif;WW domain binding motif	0.986881	26.7633	25.3506	24.7323	24.7014	24.4059	24.7523	24.235	24.4393	25.3052	25.4378	25.0292	25.1303	0.0239923	0.579199
4	Q0JGK4	Probable sucrose-phosphate synthase 1 (EC 2.4.1.14) (Sucrose phosphate synthase 1F) (OsSPS1F) (UDP-glucose-fructose-phosphate glucosyltransferase)	S	179	AQQDTPMKKKFQRNFSELTVSWSDENKEKKL	14-3-3 domain binding motif;Calmodulin-dependent protein kinase I substrate motif;Calmodulin-dependent protein kinase II substrate motif;Calmodulin-dependent protein kinase IV substrate motif;Casein kinase II substrate motif;G protein-coupled receptor kinase 1 substrate motif;PKA kinase substrate motif;PKC kinase substrate motif	1	25.8337	25.6242	25.7979	26.1345	26.1133	26.03	25.4329	25.4781	24.6713	25.8889	25.9355	25.7314	0.0257121	-0.240705
5	Q7FAH2	Glyceraldehyde-3-phosphate dehydrogenase 2, cytosolic (EC 1.2.1.12)	S	205	VDGPSMKDWRGGRAASFNIIPSSTGAAKAVG;VDGPSSKDWRGGRAASFNIIPSSTGAAKAVG	14-3-3 domain binding motif;14-3-3 domain binding motif;Calmodulin-dependent protein kinase II substrate motif;Calmodulin-dependent protein kinase II substrate motif;PKA kinase substrate motif;PKA kinase substrate motif;PKC kinase substrate motif;PKC kinase substrate motif	0.998875	22.3363	22.6874	23.9607	24.158	23.9905	23.695	24.0795	23.5603	25.4124	23.065	22.6009	23.0053	0.00602383	-1.05743
6	A0A0P0XB22	Os08g0110800 protein	S	230	ERLIKNVIAEADAGGSPALIARGFGSGQSGS	ERK1,2 kinase substrate motif;GSK-3, ERK1, ERK2, CDK5 substrate motif;WW domain binding motif	1	23.457	23.835	24.2797	24.2417	24.2458	25.1043	24.2764	24.3145	22.4117	23.6667	23.2255	23.4927	0.0272295	-1.06895
7	Q0DPW6	Os03g0656100 protein (Fragment)	S	29	RRAPAPAPAPLTPALSQRFLAERRPAPVPEP	ATM kinase substrate motif;DNA dependent Protein kinase substrate motif;PKA kinase substrate motif;PKC kinase substrate motif	0.986873	24.6294	23.9887	23.6862	24.5063	23.6731	24.4681	23.9465	24.6271	22.5917	22.6784	23.3809	22.9438	0.0233468	-1.21483
8	P93431	Ribulose bisphosphate carboxylase/oxygenase activase, chloroplastic (RA) (RuBisCO activase)	S	163	VPLILGIWGGKGQGKSFQCELVFAKMGINPI		1	23.8849	22.9498	22.9567	24.1784	23.624	24.0256	22.9022	24.3696	24.341	21.8211	23.2143	22.809	0.0407289	-1.32789
9	A0A0N7KI38	Os03g0764450 protein (Fragment)	S	363	KHIWPLNSDGPVTSASPERSTPKEKPQKRER	Casein kinase II substrate motif;Cdc2 kinase substrate motif;CDK kinase substrate motif;CDK1,2,4,6 kinase substrate motif;ERK1,2 kinase substrate motif;G protein-coupled receptor kinase 1 substrate motif;GSK3 kinase substrate motif;GSK-3, ERK1, ERK2, CDK5 substrate motif;WW domain binding motif	0.967077	22.4357	23.8476	24.5267	24.9192	25.2467	24.3611	25.0115	24.5388	23.9431	23.207	23.6311	23.6412	0.0102881	-1.34925
10	Q69XK9	Os06g0601100 protein (cDNA clone:006-203-F06, full insert sequence) (cDNA clone:006-304-G09, full insert sequence)	S	118	QVFRTKDIAPDVDPPSPRVSGCILCSIFSGS	Casein kinase I substrate motif;DNA dependent Protein kinase substrate motif;ERK1,2 kinase substrate motif;G protein-coupled receptor kinase 1 substrate motif;Growth associated histone HI kinase substrate motif;GSK3 kinase substrate motif;GSK-3, ERK1, ERK2, CDK5 substrate motif;PKA kinase substrate motif;PKC kinase substrate motif;WW domain binding motif	1	24.8669	24.2266	23.8452	24.8866	24.1356	24.6107	23.4002	24.9674	23.1049	22.5631	23.3504	23.6415	0.0251621	-1.35929
11	Q6EUS4	Non-specific serine/threonine protein kinase (EC 2.7.11.1)	Y	234	FGSAKMLVKGEANISYICSRYYRAPELIFGA	ALK kinase substrate motif;FRIP PTB domain binding motif	0.871826	22.2127	23.5045	23.2755	24.2185	22.8329	24.0868	22.4177	23.1856	23.9748	22.4122	22.0563	22.3894	0.0352925	-1.42676
12	Q8S1T0	Os01g0835500 protein	S	78	VGGMRPGGGRMTRMQSSAQVGLRGLRFLDKT	14-3-3 domain binding motif;Calmodulin-dependent protein kinase I substrate motif;Calmodulin-dependent protein kinase II substrate motif;Calmodulin-dependent protein kinase IV substrate motif;Chk1 kinase substrate motif;PKA kinase substrate motif;PKC kinase substrate motif	0.970943	26.9453	26.1574	26	27.8374	26.5326	28.0176	26.4539	25.3777	27.1088	26.3931	25.8764	25.6761	0.0450629	-1.48069
13	Q8S1T0	Os01g0835500 protein	T	627	EAQVTSKKATLSRLETTVVADAQTEDTRFPK	b-Adrenergic Receptor kinase substrate motif;Calmodulin-dependent protein kinase II substrate motif;Calmodulin-dependent protein kinase IV substrate motif;Chk1 kinase substrate motif;G protein-coupled receptor kinase 1 substrate motif;MAPKAPK2 kinase substrate motif;PKC kinase substrate motif	0.962336	24.2359	24.9241	24.3131	25.7542	24.8736	25.6031	23.961	24.4249	24.5224	23.2285	24.7515	23.688	0.0446501	-1.52096
14	Q7XPY2	Plasma membrane ATPase (EC 7.1.2.1) (Proton pump)	T	881	YGREEREAQWATAQRTLHGLQPPEVASNTLF		1	27.9432	27.237	27.4385	28.0288	27.5012	28.1041	26.4195	26.2337	26.6966	26.4713	26.085	26.2729	0.00189233	-1.60157
15	Q6H8D7	Os02g0208900 protein	S	247	PDNGSPNYQKETDGSSPVVRPVRDILGDNAP	Casein kinase I substrate motif;ERK1,2 kinase substrate motif;GSK-3, ERK1, ERK2, CDK5 substrate motif;MDC1 BRCT domain binding motif;Plk1 PBD domain binding motif;WW domain binding motif	0.877529	26.019	25.7809	25.4046	26.2031	24.9081	25.8566	25.0545	23.9895	23.6463	24.215	22.9501	24.4759	0.0435951	-1.77561
16	A0A0P0Y5T3	Os12g0101800 protein	S	289	SVSELLLALKNPRSLSESSNNTLKRKSQESL	14-3-3 domain binding motif;Calmodulin-dependent protein kinase II substrate motif;Casein kinase II substrate motif;G protein-coupled receptor kinase 1 substrate motif;MAPKAPK2 kinase substrate motif;PKA kinase substrate motif;PKC kinase substrate motif	0.986247	22.2913	23.631	23.4093	24.7308	23.4355	24.7073	24.3538	23.5324	24.6092	22.4964	22.3923	22.5258	0.0133323	-1.8197
17	Q10QG5	Mannitol transporter, putative, expressed (Os03g0197100 protein) (cDNA clone:J023048F11, full insert sequence)	S	250	RLLDIKKAVGIPEDASDGEDVVAIVRANKAS	Casein kinase I substrate motif;Casein kinase II substrate motif	1	24.0031	24.1424	23.5434	26.1144	25.634	25.778	23.4257	23.9111	22.4156	22.4082	24.4607	24.3279	0.0358452	-2.10987
18	Q5JN45	Os01g0959000 protein (cDNA clone:J023048A15, full insert sequence), serine/arginine-rich splicing factor SR45 isoform X1 [Oryza sativa Japonica Group]	S	101	PSPPPPKKASPPRKASPAPESVVLHIDHLSR	14-3-3 domain binding motif;Calmodulin-dependent protein kinase II substrate motif;ERK1,2 kinase substrate motif;GSK-3, ERK1, ERK2, CDK5 substrate motif;PKA kinase substrate motif;PKC epsilon kinase substrate motif;PKC kinase substrate motif;WW domain binding motif	0.99916	27.5083	24.526	27.0298	26.2639	24.8805	24.0679	26.2309	26.6425	27.1452	22.9012	22.3196	23.5571	0.0431451	-2.1448
19	A0A0P0W1J8	Os03g0686300 protein myosin-17 [Oryza sativa Japonica]	S	1077	MESENKVLRQQAVAISPTAKSLAAYPKSPFQ	Casein kinase II substrate motif;ERK1,2 kinase substrate motif;GSK-3, ERK1, ERK2, CDK5 substrate motif;WW domain binding motif	0.827868	24.7063	24.9242	24.203	24.5623	25.5837	24.9073	23.8439	23.2454	22.9587	22.0383	23.1978	23.2208	0.0111087	-2.19877
20	Q6ZHZ1	Probable sucrose-phosphate synthase 4 (EC 2.4.1.14) (Sucrose phosphate synthase 4F) (OsSPS4F) (UDP-glucose-fructose-phosphate glucosyltransferase)	S	170	STHDESTRGRMPRIGSTDAIEAWASQHKDKK	14-3-3 domain binding motif;Calmodulin-dependent protein kinase I substrate motif;Calmodulin-dependent protein kinase II substrate motif;Calmodulin-dependent protein kinase IV substrate motif;Chk1 kinase substrate motif;PKA kinase substrate motif;PKC kinase substrate motif	0.899201	26.5084	26.1355	27.4238	27.1736	27.165	26.6078	24.8608	27.3893	25.1757	25.3518	25.1904	23.6722	0.0166903	-2.24398
21	Q6ZHP6	Os02g0715400 protein	S	62	LTRNTDPARDPDEENSAAPADRAVEEPAAAA	Casein kinase I substrate motif;G protein-coupled receptor kinase 1 substrate motif	0.999688	23.9483	23.682	23.1914	26.9317	24.5763	25.9164	23.8247	24.0783	23.0681	23.9851	22.5712	23.9335	0.048613	-2.3115
22	Q6K272	Os09g0123100 protein (cDNA clone:J033135J15, full insert sequence)-CCR4-NOT transcription complex subunit 10 [Oryza sativa Japonica Group]	S	722	PYSIENCEKALVEKDSDGEDSVAPVVTKLSS	b-Adrenergic Receptor kinase substrate motif;Casein kinase I substrate motif;Casein kinase II substrate motif;PKA kinase substrate motif;PKC kinase substrate motif	0.964437	25.9421	23.5323	25.5306	26.5432	26.7266	26.893	25.7551	24.4523	24.0195	23.207	25.2263	24.1271	0.0128668	-2.53415
23	Q0IZR7	Os09g0553900 protein (cDNA clone:J013042N12, full insert sequence)	T	338	FSITSPKVSRSEPKLTPTKGSPSPDLRGIDD	Cdc2 kinase substrate motif;CDK1,2,4,6 kinase substrate motif;CDK5 kinase substrate motif;GSK-3, ERK1, ERK2, CDK5 substrate motif;PKA kinase substrate motif;PKC kinase substrate motif;RAF1 kinase substrate motif;WW domain binding motif	0.95825	27.0232	26.9915	27.2762	24.6162	26.2401	26.8992	23.5607	26.8485	26.9874	23.1167	23.4401	23.2767	0.0182049	-2.64067
24	Q9SNK3	Glyceraldehyde-3-phosphate dehydrogenase (EC 1.2.1.-)	T	289	LRRARAAALNIVPTSTGAAKAVALVLPNLKG;LRRARAAALNIVPTSTGAAKAVALVLPQLKG	MDC1 BRCT domain binding motif;MDC1 BRCT domain binding motif;Plk1 PBD domain binding motif;Plk1 PBD domain binding motif	0.802555	24.6473	25.8478	25.3706	27.2123	25.0285	26.1098	24.1732	23.7956	24.596	22.3718	23.3866	24.6524	0.0441006	-2.64656

## Sheet: WD N250 vs. WW N750
			Phosphosites significantly changed in phosphorylation in WD/N250 vs. WW/N750
Row	UniProt ID	Protein name	Phosphorylated amino acid	Position	Sequence window	Motifs	Localization probability	Log2 LFQ Intensity_WW/N750-1	Log2 LFQ Intensity_WW/N750-2	Log2 LFQ Intensity_WW/N750-3	Log2 LFQ Intensity_WW/N250-1	Log2 LFQ Intensity_WW/N250-2	Log2 LFQ Intensity_WW/N250-3	Log2 LFQ Intensity_WD/N750-1	Log2 LFQ Intensity_WD/N750-2	Log2 LFQ Intensity_WD/N750-3	Log2 LFQ Intensity_WD/N250-1	Log2 LFQ Intensity_WD/N250-2	Log2 LFQ Intensity_WD/N250-3	P-value	Fold change
1	Q84M73	Expressed protein (Os03g0857400 protein) (cDNA clone:J013052N16, full insert sequence)	S	81	QDGDEVVDSNVLQYCSIDGKGKKAEKRSLGE		0.985554	23.1959	24.1083	23.7057	24.0111	25.3534	25.9677	27.3154	23.954	21.9874	26.8644	25.7617	27.0187	0.00376584	2.87832
2	P0C422	Photosystem II reaction center protein H (PSII-H) (Photosystem II 10 kDa phosphoprotein)	T	5	___________MATQTVEDSSRPGPRQTRVG	Casein kinase II substrate motif;G protein-coupled receptor kinase 1 substrate motif	0.999762	24.4269	23.3333	25.173	26.7085	26.0087	24.3637	25.9516	27.3669	27.4261	27.0781	26.9922	26.1994	0.0154038	2.44551
3	P12331	Chlorophyll a-b binding protein 2, chloroplastic (LHCII type I CAB-2) (LHCP)	S	32	AAAKVFGEGRITMRKSAAKPKPAASGSPWYG	G protein-coupled receptor kinase 1 substrate motif;PKA kinase substrate motif;PKC kinase substrate motif	0.99999	26.4353	28.2078	27.3636	30.5146	29.9256	30.0185	28.6513	29.8202	23.2376	29.8326	28.7957	29.7549	0.0253644	2.12555
4	A0A0P0YBU9	Os12g0595401 protein	Y	69	RVLVHLPVVDLFRLGYLFSPRWLDIWRAEPL		1	22.2305	23.7523	23.1793	25.477	24.7317	24.6794	24.1325	24.8924	26.0298	24.9187	24.6447	25.6302	0.0194639	2.01049
5	A0A0P0YBU9	Os12g0595401 protein-F-box domain containing protein [Oryza sativa Japonica Group]	S	72	VHLPVVDLFRLGYLFSPRWLDIWRAEPLYLH	ERK1,2 kinase substrate motif;Growth associated histone HI kinase substrate motif;GSK-3, ERK1, ERK2, CDK5 substrate motif;PKA kinase substrate motif;PKC kinase substrate motif;WW domain binding motif	1	23.9585	23.0332	23.8825	23.8653	24.7317	24.6794	24.5413	22.7142	26.0298	24.9187	24.6447	25.6302	0.0260627	1.43978
6	Q84L14	Nuclear cap-binding protein subunit 2 (20 kDa nuclear cap-binding protein) (NCBP 20 kDa subunit) (CBP20)	S	230	AIDSEKNPRFREKGDSDEEDDDYDKRRRR__	b-Adrenergic Receptor kinase substrate motif;BARD1 BRCT domain binding motif;Casein kinase II substrate motif;PKA kinase substrate motif;PKC kinase substrate motif	0.99972	22.7235	22.9267	23.0197	24.6871	23.8045	24.9193	23.768	24.3713	23.561	24.5422	23.7505	24.4975	0.00716425	1.37346
7	A0A0P0VNU0	Os02g0709900 protein (Fragment)	S	118	QNRKGRAKGGVKRTRSVLAVVEDAKEILGEN	14-3-3 domain binding motif;AMP-activated protein kinase substrate motif;Calmodulin-dependent protein kinase I substrate motif;Calmodulin-dependent protein kinase II alpha substrate motif;Calmodulin-dependent protein kinase II substrate motif;Calmodulin-dependent protein kinase IV substrate motif;Chk1 kinase substrate motif;Phosphorylase kinase substrate motif;PKA kinase substrate motif;PKC kinas…	1	25.5471	25.5122	24.9787	26.3045	25.2919	25.6928	25.5636	24.9745	25.7788	25.9279	26.0631	26.315	0.0249292	0.756025
8	P12330	Chlorophyll a-b binding protein 1, chloroplastic (LHCII type I CAB-1) (LHCP)	T	35	TSSALFGEARITMRKTAAKPKPAASSGSPWY	G protein-coupled receptor kinase 1 substrate motif;PKA kinase substrate motif;PKC kinase substrate motif	1	31.2632	31.2977	31.7263	31.7615	29.6962	31.4129	30.7659	31.2563	29.9664	30.8852	30.3343	30.7244	0.0242114	-0.781076
9	A0A0P0W9D5	Os04g0382300 protein (Fragment)	S	55	SAVGSPVANLVSRLGSFTFRRTSSGRVETTT	14-3-3 domain binding motif;Calmodulin-dependent protein kinase II alpha substrate motif;Calmodulin-dependent protein kinase II substrate motif;Calmodulin-dependent protein kinase IV substrate motif;Casein kinase II substrate motif;Chk1 kinase substrate motif;MAPKAPK2 kinase substrate motif;PKA kinase substrate motif;PKC kinase substrate motif	0.998966	23.9561	23.9098	24.0323	24.4977	24.0245	23.4553	23.2843	23.1015	23.2252	22.9082	23.1967	23.2509	0.00164507	-0.847467
10	Q0DEU8	Transketolase (EC 2.2.1.1) (Fragment)	S	366	LPAGWADALPKYTPESPADATRNLSQQCLNA	b-Adrenergic Receptor kinase substrate motif;Casein kinase II substrate motif;ERK1,2 kinase substrate motif;G protein-coupled receptor kinase 1 substrate motif;GSK-3, ERK1, ERK2, CDK5 substrate motif;Pyruvate dehydrogenase kinase substrate motif;WW domain binding motif	0.993971	24.7323	24.3655	24.0273	24.2288	22.8588	23.0446	23.9705	24.3776	23.8573	23.6751	23.5464	23.0892	0.0255578	-0.938158
11	Q5SMK6	Probable protein phosphatase 2C 54 (OsPP2C54) (EC 3.1.3.16)	S	346	PQVRVSRPGRVARSISAEGLNSLRTLLRNQ_	14-3-3 domain binding motif;Calmodulin-dependent protein kinase I substrate motif;Calmodulin-dependent protein kinase II substrate motif;Calmodulin-dependent protein kinase IV substrate motif;Casein kinase II substrate motif;Chk1 kinase substrate motif;PKA kinase substrate motif;PKC kinase substrate motif	0.995394	23.9655	23.4091	23.6866	24.5996	23.132	23.6229	23.464	22.0265	23.4814	23.1949	22.4273	22.3712	0.0301145	-1.02261
12	Q0DPW6	Os03g0656100 protein (Fragment)	S	29	RRAPAPAPAPLTPALSQRFLAERRPAPVPEP	ATM kinase substrate motif;DNA dependent Protein kinase substrate motif;PKA kinase substrate motif;PKC kinase substrate motif	0.986873	24.6294	23.9887	23.6862	24.5063	23.6731	24.4681	23.9465	24.6271	22.5917	22.6784	23.3809	22.9438	0.033324	-1.10044
13	Q5Z9S8	ABC transporter G family member 42 (OsABCG42) (Pleiotropic drug resistance protein 12) (OsPDR12)	S	873	ARLSNSSSNGVSRLMSIGSNEAGPRRGMVLP	14-3-3 domain binding motif;Calmodulin-dependent protein kinase II alpha substrate motif;Calmodulin-dependent protein kinase II substrate motif;Calmodulin-dependent protein kinase IV substrate motif;Casein kinase II substrate motif;Chk1 kinase substrate motif;MAPKAPK2 kinase substrate motif;Phosphorylase kinase substrate motif;PKA kinase substrate motif;PKC kinase substrate motif	0.999987	25.1595	25.6517	24.7702	25.7525	23.3766	25.5364	23.697	25.3188	22.7313	23.9921	23.8298	24.1743	0.0120122	-1.1951
14	A0A0P0VS07	Os02g0831100 protein (Fragment)	S	154	LQPEKERDRGPRARLSPPSQTDLRGKLHDRL	Casein kinase II substrate motif;ERK1,2 kinase substrate motif;GSK-3, ERK1, ERK2, CDK5 substrate motif;PKA kinase substrate motif;PKC kinase substrate motif;WW domain binding motif	0.971039	24.8217	24.0115	24.2165	24.1379	23.4114	24.4674	23.9402	22.8929	24.0071	22.7727	23.2535	23.3653	0.0159198	-1.21942
15	Q7XPY2	Plasma membrane ATPase (EC 7.1.2.1) (Proton pump)	T	881	YGREEREAQWATAQRTLHGLQPPEVASNTLF		1	27.9432	27.237	27.4385	28.0288	27.5012	28.1041	26.4195	26.2337	26.6966	26.4713	26.085	26.2729	0.00603982	-1.26315
16	Q0DI98	Os05g0406000 protein (Fragment)	S	65	RVTPPDSPPRSFASISPPRRHSISITSRNLF	Cdc2 kinase substrate motif;CDK kinase substrate motif;CDK1,2,4,6 kinase substrate motif;ERK1,2 kinase substrate motif;GSK-3, ERK1, ERK2, CDK5 substrate motif;WW domain binding motif	0.99715	27.1343	26.723	27.8785	27.3296	25.4244	26.5967	25.741	25.7717	24.3508	25.834	25.5833	26.3255	0.0296989	-1.33101
17	A0A0P0XAR8	Os07g0685400 protein (Fragment)	S	148	QGKTVQLGKITETVQSPVKAKPEVAFQPPAF	Cdc2 kinase substrate motif;CDK kinase substrate motif;CDK1,2,4,6 kinase substrate motif;ERK1,2 kinase substrate motif;G protein-coupled receptor kinase 1 substrate motif;GSK-3, ERK1, ERK2, CDK5 substrate motif;WW domain binding motif	0.996454	23.495	23.7057	23.4633	25.0518	22.5153	23.9289	22.3823	23.2519	23.465	22.6316	22.2494	21.674	0.00899146	-1.36965
18	A0A0P0Y9G9	Os12g0407500 protein (Fragment)	S	251	VSNKESARNDKDDVFSDSEAEDGSSKGRREK	Casein kinase I substrate motif;Casein kinase II substrate motif;G protein-coupled receptor kinase 1 substrate motif	0.818999	25.0539	25.0985	24.6292	24.5424	23.9712	23.8286	23.1675	24.8341	24.8194	23.7137	23.3466	23.5098	0.0015653	-1.40386
19	A0A0P0VKR4	Os02g0580900 protein (Fragment)-protein NRT1/ PTR FAMILY 6.4 [Oryza sativa Japonica Group	S	31	RCLDRAAIMEADLAASPAKTNQTSAAPAATV	Cdc2 kinase substrate motif;CDK kinase substrate motif;CDK1,2,4,6 kinase substrate motif;ERK1,2 kinase substrate motif;G protein-coupled receptor kinase 1 substrate motif;GSK-3, ERK1, ERK2, CDK5 substrate motif;WW domain binding motif	1	24.2953	25.5404	25.0235	26.6631	23.6684	23.6112	21.2891	22.6553	23.9796	24.1555	23.2859	22.8632	0.0443689	-1.51821
20	Q6EU15	Os02g0672100 protein	S	85	KKRTLPDPDAEVIALSPKTLLATNRFVCEVC	Casein kinase II substrate motif;ERK1,2 kinase substrate motif;Growth associated histone HI kinase substrate motif;GSK-3, ERK1, ERK2, CDK5 substrate motif;PKA kinase substrate motif;PKC kinase substrate motif;WW domain binding motif	1	25.3913	24.4535	24.7663	25.6332	23.5007	23.6574	23.4108	23.3801	23.7275	23.0018	22.6555	23.9798	0.026462	-1.65801
21	A0A0P0X3D0	Plasma membrane ATPase (EC 7.1.2.1) (Fragment)	T	743	FGTQENQLKWATAQRTIHGLQPAATAAVFRD		0.999999	25.6509	24.1713	25.0232	25.4917	26.0825	23.5303	23.5063	24.1418	27.1061	22.5554	23.2153	23.8114	0.035392	-1.75448
22	A0A0P0W1J8	Os03g0686300 protein myosin-17 [Oryza sativa Japonica]	S	1077	MESENKVLRQQAVAISPTAKSLAAYPKSPFQ	Casein kinase II substrate motif;ERK1,2 kinase substrate motif;GSK-3, ERK1, ERK2, CDK5 substrate motif;WW domain binding motif	0.827868	24.7063	24.9242	24.203	24.5623	25.5837	24.9073	23.8439	23.2454	22.9587	22.0383	23.1978	23.2208	0.0157641	-1.79222
23	Q6H8D7	Os02g0208900 protein	S	247	PDNGSPNYQKETDGSSPVVRPVRDILGDNAP	Casein kinase I substrate motif;ERK1,2 kinase substrate motif;GSK-3, ERK1, ERK2, CDK5 substrate motif;MDC1 BRCT domain binding motif;Plk1 PBD domain binding motif;WW domain binding motif	0.877529	26.019	25.7809	25.4046	26.2031	24.9081	25.8566	25.0545	23.9895	23.6463	24.215	22.9501	24.4759	0.0212058	-1.85452
24	Q6ZHZ1	Probable sucrose-phosphate synthase 4 (EC 2.4.1.14) (Sucrose phosphate synthase 4F) (OsSPS4F) (UDP-glucose-fructose-phosphate glucosyltransferase)	S	170	STHDESTRGRMPRIGSTDAIEAWASQHKDKK	14-3-3 domain binding motif;Calmodulin-dependent protein kinase I substrate motif;Calmodulin-dependent protein kinase II substrate motif;Calmodulin-dependent protein kinase IV substrate motif;Chk1 kinase substrate motif;PKA kinase substrate motif;PKC kinase substrate motif	0.899201	26.5084	26.1355	27.4238	27.1736	27.165	26.6078	24.8608	27.3893	25.1757	25.3518	25.1904	23.6722	0.041307	-1.95107
25	Q2QM23	Methyl-CpG binding domain containing protein, expressed (Os12g0620400 protein) (cDNA clone:001-020-H05, full insert sequence) (cDNA clone:J023126H05, full insert sequence)	T	197	EMKTAEDASKTADADTPAPAPAGTEKEDAKP	b-Adrenergic Receptor kinase substrate motif;Casein kinase I substrate motif;G protein-coupled receptor kinase 1 substrate motif;GSK-3, ERK1, ERK2, CDK5 substrate motif;WW domain binding motif	0.992292	26.4336	25.6594	24.4308	25.0101	23.5157	25.1583	23.9071	24.0866	23.8326	22.7484	23.8692	23.9462	0.0469348	-1.98667
26	29	Probable aquaporin PIP2-6 (OsPIP2;6) (Plasma membrane intrinsic protein 2-6)	S	2	______________MSKEVSEEPEHVRPKDY	Casein kinase II substrate motif;G protein-coupled receptor kinase 1 substrate motif;GSK3 kinase substrate motif	0.988649	26.3592	26.0334	25.8946	23.9524	24.6233	23.303	23.4741	23.5382	25.0541	23.2311	23.8947	24.5271	0.00516733	-2.21144
27	Q5JN45	Os01g0959000 protein (cDNA clone:J023048A15, full insert sequence)	S	101	PSPPPPKKASPPRKASPAPESVVLHIDHLSR	14-3-3 domain binding motif;Calmodulin-dependent protein kinase II substrate motif;ERK1,2 kinase substrate motif;GSK-3, ERK1, ERK2, CDK5 substrate motif;PKA kinase substrate motif;PKC epsilon kinase substrate motif;PKC kinase substrate motif;WW domain binding motif	0.99916	27.5083	24.526	27.0298	26.2639	24.8805	24.0679	26.2309	26.6425	27.1452	22.9012	22.3196	23.5571	0.0258529	-3.42877
28	Q5NB69	Os01g0231700 protein (cDNA clone:002-128-C07, full insert sequence)- 60S acidic ribosomal protein P3-like [Oryza sativa Japonica Group]	S	109	EAPKAEEKKEEEKEESEDDLGFSLFD_____	b-Adrenergic Receptor kinase substrate motif;Casein kinase II substrate motif;G protein-coupled receptor kinase 1 substrate motif;PKA kinase substrate motif;PKC kinase substrate motif;Pyruvate dehydrogenase kinase substrate motif	0.914864	29.2323	27.8393	26.3909	28.9262	23.0055	24.1165	23.7986	25.8242	29.3796	22.7469	25.6034	23.8711	0.0326083	-3.74703
29	Q0IZR7	Os09g0553900 protein (cDNA clone:J013042N12, full insert sequence)	T	338	FSITSPKVSRSEPKLTPTKGSPSPDLRGIDD	Cdc2 kinase substrate motif;CDK1,2,4,6 kinase substrate motif;CDK5 kinase substrate motif;GSK-3, ERK1, ERK2, CDK5 substrate motif;PKA kinase substrate motif;PKC kinase substrate motif;RAF1 kinase substrate motif;WW domain binding motif	0.95825	27.0232	26.9915	27.2762	24.6162	26.2401	26.8992	23.5607	26.8485	26.9874	23.1167	23.4401	23.2767	7.92394e-06	-3.8191

## Sheet: WD N750 vs. WW N250
			Phosphosites significantly changed in phosphorylation in WD/N750 vs. WW/N250
Row	UniProt ID	Protein name	Phosphorylated amino acid	Position	Sequence window	Motifs	Localization probability	Log2 LFQ Intensity_WW/N750-1	Log2 LFQ Intensity_WW/N750-2	Log2 LFQ Intensity_WW/N750-3	Log2 LFQ Intensity_WW/N250-1	Log2 LFQ Intensity_WW/N250-2	Log2 LFQ Intensity_WW/N250-3	Log2 LFQ Intensity_WD/N750-1	Log2 LFQ Intensity_WD/N750-2	Log2 LFQ Intensity_WD/N750-3	Log2 LFQ Intensity_WD/N250-1	Log2 LFQ Intensity_WD/N250-2	Log2 LFQ Intensity_WD/N250-3	P-value	Fold change
1	Q6Z5N4	Pyruvate dehydrogenase E1 component subunit alpha-1, mitochondrial (PDHE1-A) (EC 1.2.4.1)	S	293	GPIVLEMDTYRYHGHSMSDPGSTYRTRDEIS	Casein kinase II substrate motif;G protein-coupled receptor kinase 1 substrate motif;Pyruvate dehydrogenase kinase substrate motif	0.863083	26.9558	28.309	26.2022	27.6359	24.1624	24.586	28.1965	28.7646	29.4402	22.3519	28.6145	22.8499	0.044144	3.33902
2	A0A0P0WKD6	Os05g0291700 protein	T	375	ETRASQRTRQAEEDTTTVKAGGKKTPSDEAA	Casein kinase I substrate motif;G protein-coupled receptor kinase 1 substrate motif	0.755897	17.2309	23.12	20.4947	21.4046	22.6245	23.3039	23.6119	24.4797	24.4945	26.9066	20.5319	23.8887	0.0493085	1.75102
3	Q94E74	Os01g0511100 protein (cDNA clone:J023069J05, full insert sequence)	S	3	_____________MASPSAPGPKLQKAMVAV	Casein kinase II substrate motif;ERK1,2 kinase substrate motif;G protein-coupled receptor kinase 1 substrate motif;GSK-3, ERK1, ERK2, CDK5 substrate motif;WW domain binding motif	0.99539	23.1263	23.8852	23.7037	24.7356	24.3635	23.8282	25.3178	25.6595	25.29	23.8426	24.1811	23.6994	0.0182489	1.11331
4	Q67U26	Villin-3	S	808	NALAANFENPNARNLSTPPPAIRKPSPKSPS	14-3-3 domain binding motif;Calmodulin-dependent protein kinase II substrate motif;G protein-coupled receptor kinase 1 substrate motif;MAPKAPK2 kinase substrate motif;PKA kinase substrate motif;PKC kinase substrate motif	0.976277	22.2347	23.2345	23.5644	24.4653	23.8995	23.7254	23.1033	23.5765	23.048	23.7724	21.8476	24.6253	0.0478647	-0.787453
5	Q0JGK4	Probable sucrose-phosphate synthase 1 (EC 2.4.1.14) (Sucrose phosphate synthase 1F) (OsSPS1F) (UDP-glucose-fructose-phosphate glucosyltransferase)	S	179	AQQDTPMKKKFQRNFSELTVSWSDENKEKKL	14-3-3 domain binding motif;Calmodulin-dependent protein kinase I substrate motif;Calmodulin-dependent protein kinase II substrate motif;Calmodulin-dependent protein kinase IV substrate motif;Casein kinase II substrate motif;G protein-coupled receptor kinase 1 substrate motif;PKA kinase substrate motif;PKC kinase substrate motif	1	25.8337	25.6242	25.7979	26.1345	26.1133	26.03	25.4329	25.4781	24.6713	25.8889	25.9355	25.7314	0.0270841	-0.898527
6	Q6ZD98	Os08g0156700 protein (cDNA clone:J023062F08, full insert sequence)	S	3	_____________MASPGPATAGELLRIDPV	ERK1,2 kinase substrate motif;G protein-coupled receptor kinase 1 substrate motif;GSK-3, ERK1, ERK2, CDK5 substrate motif;WW domain binding motif	0.999988	24.7525	23.625	24.8552	24.4571	24.1415	24.2023	23.4884	23.1395	23.0025	24.0115	20.1387	24.509	0.0037091	-1.05684
7	Q8S1T0	Os01g0835500 protein	T	627	EAQVTSKKATLSRLETTVVADAQTEDTRFPK	b-Adrenergic Receptor kinase substrate motif;Calmodulin-dependent protein kinase II substrate motif;Calmodulin-dependent protein kinase IV substrate motif;Chk1 kinase substrate motif;G protein-coupled receptor kinase 1 substrate motif;MAPKAPK2 kinase substrate motif;PKC kinase substrate motif	0.962336	24.2359	24.9241	24.3131	25.7542	24.8736	25.6031	23.961	24.4249	24.5224	23.2285	24.7515	23.688	0.0263946	-1.10751
8	Q7XHW4	Probable calcium-binding protein CML24 (Calmodulin-like protein 24)	S	27	SVAAVRPSLGKAPSPSFRLRNGSLNAVRLRR	DNA dependent Protein kinase substrate motif;PKA kinase substrate motif;PKC kinase substrate motif	0.9999	24.376	24.2519	23.995	25.0798	24.7293	25.0712	23.571	23.1113	24.1511	25.229	24.9022	23.0724	0.0138436	-1.34897
9	Q7XPY2	Plasma membrane ATPase (EC 7.1.2.1) (Proton pump)	T	881	YGREEREAQWATAQRTLHGLQPPEVASNTLF		1	27.9432	27.237	27.4385	28.0288	27.5012	28.1041	26.4195	26.2337	26.6966	26.4713	26.085	26.2729	0.00356232	-1.42807
10	A0A0P0W1J8	Os03g0686300 protein myosin-17 [Oryza sativa Japonica]	S	1077	MESENKVLRQQAVAISPTAKSLAAYPKSPFQ	Casein kinase II substrate motif;ERK1,2 kinase substrate motif;GSK-3, ERK1, ERK2, CDK5 substrate motif;WW domain binding motif	0.827868	24.7063	24.9242	24.203	24.5623	25.5837	24.9073	23.8439	23.2454	22.9587	22.0383	23.1978	23.2208	0.0137227	-1.6684
11	Q9SNK3	Glyceraldehyde-3-phosphate dehydrogenase (EC 1.2.1.-)	T	289	LRRARAAALNIVPTSTGAAKAVALVLPNLKG;LRRARAAALNIVPTSTGAAKAVALVLPQLKG	MDC1 BRCT domain binding motif;MDC1 BRCT domain binding motif;Plk1 PBD domain binding motif;Plk1 PBD domain binding motif	0.802555	24.6473	25.8478	25.3706	27.2123	25.0285	26.1098	24.1732	23.7956	24.596	22.3718	23.3866	24.6524	0.0453711	-1.9286
12	Q6K272	Os09g0123100 protein (cDNA clone:J033135J15, full insert sequence)- CCR4-NOT transcription complex subunit 10 [Oryza sativa Japonica Group]	S	722	PYSIENCEKALVEKDSDGEDSVAPVVTKLSS	b-Adrenergic Receptor kinase substrate motif;Casein kinase I substrate motif;Casein kinase II substrate motif;PKA kinase substrate motif;PKC kinase substrate motif	0.964437	25.9421	23.5323	25.5306	26.5432	26.7266	26.893	25.7551	24.4523	24.0195	23.207	25.2263	24.1271	0.0203992	-1.97861
13	Q0D4F7	Os07g0628700 protein	S	583	MKTITEMVDPYLRSDSSSLDEILRCIHVGLV	14-3-3 domain binding motif;b-Adrenergic Receptor kinase substrate motif;Calmodulin-dependent protein kinase II substrate motif;Calmodulin-dependent protein kinase IV substrate motif;Casein kinase II substrate motif;PKA kinase substrate motif;PKC kinase substrate motif	0.982301	25.5341	25.1845	25.3642	25.896	25.82	25.3924	24.1206	24.3564	22.5916	23.7103	25.2285	25.3241	0.0248619	-2.01325
14	Q6ZHP6	Os02g0715400 protein	S	62	LTRNTDPARDPDEENSAAPADRAVEEPAAAA	Casein kinase I substrate motif;G protein-coupled receptor kinase 1 substrate motif	0.999688	23.9483	23.682	23.1914	26.9317	24.5763	25.9164	23.8247	24.0783	23.0681	23.9851	22.5712	23.9335	0.0449486	-2.15109
15	Q6H547	Ribonuclease	S	970	AKKERLQIWQYGDVESDEEEQAPAARRTGGR	b-Adrenergic Receptor kinase substrate motif;BARD1 BRCT domain binding motif;Casein kinase I substrate motif;Casein kinase II substrate motif	0.999118	23.039	25.4413	26.1831	27.0437	27.1473	27.169	25.8693	24.6781	23.9121	26.6641	22.8399	26.6577	0.0157293	-2.30019
16	Q0IZR7	Os09g0553900 protein (cDNA clone:J013042N12, full insert sequence)- protein Plastid Movement Impaired 1 [Oryza sativa Japonica Group]	T	489	GKTEDTRDGDAAALDTDEEEVTREFLQLLEQ	b-Adrenergic Receptor kinase substrate motif;Casein kinase II substrate motif	0.977078	23.0343	26.2433	23.9153	26.4477	25.7275	26.4722	24.1529	23.6834	23.1459	25.8516	23.2716	25.8941	0.0025438	-2.55508
17	Q10QG5	Mannitol transporter, putative, expressed (Os03g0197100 protein) (cDNA clone:J023048F11, full insert sequence)	S	250	RLLDIKKAVGIPEDASDGEDVVAIVRANKAS	Casein kinase I substrate motif;Casein kinase II substrate motif	1	24.0031	24.1424	23.5434	26.1144	25.634	25.778	23.4257	23.9111	22.4156	22.4082	24.4607	24.3279	0.00499921	-2.59131
18	Q6AVI0	Zinc finger BED domain-containing protein Ricesleeper2 (Transposase-like protein Ricesleeper2)	T	137	IKNQEHKLALTPAVGTDNDGEGTVERPSKRR	Casein kinase II substrate motif	0.974816	23.6047	27.2962	27.387	27.3184	26.9492	27.0157	24.3911	23.9133	24.1834	24.287	22.9788	27.2002	8.13645e-05	-2.9318
